# Supplementary material for: Aluminium-mediated aromatic C–F bond activation: regioswitchable construction of benzene-fused triphenylene frameworks
Source: Royal Society of Chemistry journal article supplement (doi:10.1039/c6cc07199f), 2016-01-01

# Aluminium-mediated Aromatic C–F Bond Activation: Regioswitchable Construction of Benzene-fused Triphenylene Frameworks

Naoto Suzuki,<sup>a</sup> Takeshi Fujita,<sup>a</sup> Konstantin Yu. Amsharov<sup>b</sup> and Junji Ichikawa<sup>a,\*</sup>

*<sup>a</sup>Division of Chemistry, Faculty of Pure and Applied Sciences, University of Tsukuba  
Tsukuba, Ibaraki 305-8571, Japan  
junji@chem.tsukuba.ac.jp*

*<sup>b</sup>Institute of Organic Chemistry II, University of Erlangen-Nürnberg  
Henkestr. 42, 91054 Erlangen, Germany*

## Supporting Information

### Table of Contents

|                                                                                                          |     |
|----------------------------------------------------------------------------------------------------------|-----|
| 1. General Statement.....                                                                                | S2  |
| 2. Preparation of Cyclisation Precursors <b>1</b>                                                        |     |
| 2.1 Preparation of 1-Fluoronaphthalenes <b>1a–1f</b> .....                                               | S2  |
| 2.2 Preparation of 1-Fluoroanthracene <b>1g</b> .....                                                    | S7  |
| 2.3 Preparation of 1-Halonaphthalenes <b>1h–1j</b> .....                                                 | S9  |
| 2.4 Preparation of 1-Aminonaphthalene <b>1k</b> .....                                                    | S11 |
| 3. AlCl <sub>3</sub> -Mediated Cyclisation of 1-Fluoronaphthalenes <b>1</b> .....                        | S12 |
| 4. $\gamma$ -Al <sub>2</sub> O <sub>3</sub> -Mediated Cyclisation of 1-Fluoronaphthalenes <b>1</b> ..... | S15 |
| 5. Mechanistic Study 1: AlCl <sub>3</sub> -Mediated Cyclisation of Halonaphthalenes <b>1h–1j</b> .....   | S17 |
| 6. Mechanistic Study 2: Cyclisation of Diazonium Salt .....                                              | S18 |
| 7. References.....                                                                                       | S18 |
| 8. <sup>1</sup> H, <sup>13</sup> C and <sup>19</sup> F NMR charts.....                                   | S19 |

## 1. General Statement

$^1\text{H}$  NMR,  $^{13}\text{C}$  NMR, and  $^{19}\text{F}$  NMR spectra were recorded on a Bruker Avance 500 or a JEOL ECS-400 spectrometer. Chemical shift values are given in ppm relative to internal  $\text{Me}_4\text{Si}$  (for  $^1\text{H}$  NMR:  $\delta = 0.00$  ppm),  $\text{CDCl}_3$  (for  $^{13}\text{C}$  NMR:  $\delta = 77.0$  ppm) and  $\text{C}_6\text{F}_6$  (for  $^{19}\text{F}$  NMR:  $\delta = 0.00$  ppm). IR spectra were recorded on a Horiba FT-300S spectrometer by the attenuated total reflectance (ATR) method. Mass spectra were measured on a JEOL JMS-T100GCV or a JMS-T100CS spectrometer. Elemental analyses were carried out at the Elemental Analysis Laboratory, Division of Chemistry, Faculty of Pure and Applied Sciences, University of Tsukuba.

Column chromatography and preparative thin-layer chromatography (PTLC) were conducted on silica gel (Silica Gel 60 N, Kanto Chemical Co., Inc. for column chromatography and Wakogel B-5F, Wako Pure Chemical Industries for PTLC). All the reactions were conducted under nitrogen. Diethyl ether, tetrahydrofuran (THF) and dichloromethane were purified by a solvent-purification system (GlassContour) equipped with columns of activated alumina and supported-copper catalyst (Q-5) before use. 1,1,1,3,3,3-Hexafluoropropan-2-ol (HFIP) and chlorobenzene were distilled from  $\text{CaH}_2$  and stored over activated molecular sieves 4A. 1-Fluoro-2-iodonaphthalene (**4a**)<sup>1</sup>, 1-chloronaphthalen-2-yl trifluoromethanesulfonate<sup>2</sup> and 1-(trimethylsilyl)naphthalen-2-yl trifluoromethanesulfonate<sup>3</sup> were prepared according to the literature procedures. Unless otherwise noted, materials were obtained from commercial sources and used directly without further purifications.

## 2. Preparation of Cyclisation Precursors 1

### 2.1 Preparation of 1-Fluoronaphthalenes 1a–1f

#### 2-(Biphenyl-2-yl)-1-fluoronaphthalene (**1a**)

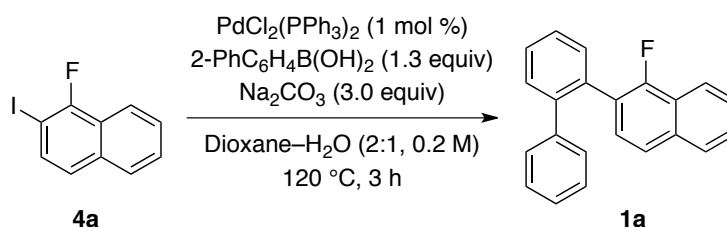

In a flask were placed 1-fluoro-2-iodonaphthalene (**4a**, 2.72 g, 10.0 mmol), (biphenyl-2-yl)boronic acid (2.57 g, 13.0 mmol),  $\text{Na}_2\text{CO}_3$  (3.18 g, 30.0 mmol), and  $\text{PdCl}_2(\text{PPh}_3)_2$  (70 mg, 0.10 mmol). After the flask was purged with nitrogen, a degassed mixture of 1,4-dioxane (33.3 mL) and water (16.7 mL) was added. The mixture was heated at  $120^\circ\text{C}$  for 3 h, and then cooled to room temperature. After aqueous  $\text{HCl}$  (2 M, 30 mL) was added to the reaction mixture, the organic materials were extracted with dichloromethane thrice. The combined extracts were washed with brine and dried over  $\text{Na}_2\text{SO}_4$ . After removing the solvent under reduced pressure, the residue was purified by silica gel column chromatography (hexane/EtOAc = 50:1) to give **1a** (2.97 g, quant.) as a white solid.

$^1\text{H}$  NMR (500 MHz,  $\text{CDCl}_3$ ):  $\delta$  7.11 (dd,  $J = 8.4, 7.3$  Hz, 1H), 7.14–7.16 (m, 3H), 7.17–7.19 (m,

2H), 7.44–7.53 (m, 7H), 7.77–7.79 (m, 1H), 8.02–8.03 (m, 1H).  $^{13}\text{C}$  NMR (126 MHz,  $\text{CDCl}_3$ ):  $\delta$  120.8 (d,  $J = 6$  Hz), 122.8 (d,  $J = 3$  Hz), 123.3 (d,  $J = 15$  Hz), 123.7 (d,  $J = 17$  Hz), 126.2, 126.60, 126.60, 127.2, 127.4, 127.9, 128.2, 129.0 (d,  $J = 3$  Hz), 129.3, 130.4, 131.4, 133.9 (d,  $J = 3$  Hz), 134.4, 141.2, 141.7, 154.9 (d,  $J = 253$  Hz).  $^{19}\text{F}$  NMR (470 MHz,  $\text{CDCl}_3$ ):  $\delta$  35.6 (d,  $J_{\text{FH}} = 7$  Hz, 1F). IR (neat):  $\nu$  3059, 3020, 1483, 1464, 1377, 814, 760, 741, 700  $\text{cm}^{-1}$ . HRMS (EI+):  $m/z$  Calcd. for  $\text{C}_{22}\text{H}_{15}\text{F}$   $[\text{M}]^+$ : 298.1158; Found: 298.1165.

## 2-(1-Fluoronaphthalen-2-yl)phenol

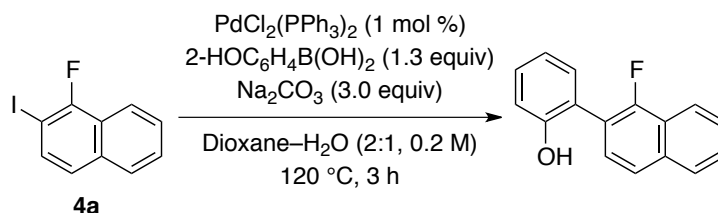

In a flask were placed 1-fluoro-2-iodonaphthalene (**4a**, 5.44 g, 20.0 mmol), (2-hydroxyphenyl)boronic acid (3.59 g, 26.0 mmol),  $\text{Na}_2\text{CO}_3$  (6.36 g, 60.0 mmol), and  $\text{PdCl}_2(\text{PPh}_3)_2$  (140 mg, 0.20 mmol). After the flask was purged with nitrogen, a degassed mixture of 1,4-dioxane (66.7 mL) and water (33.3 mL) was added. The mixture was heated at 120 °C for 3 h, and then cooled to room temperature. After aqueous HCl (2 M, 30 mL) was added to the reaction mixture, the organic materials were extracted with dichloromethane thrice. The combined extracts were washed with brine and dried over  $\text{Na}_2\text{SO}_4$ . After removing the solvent under reduced pressure, the residue was purified by silica gel column chromatography (hexane/EtOAc = 15:1) to give 2-(1-fluoronaphthalen-2-yl)phenol (4.76 g, quant.) as a white solid.

$^1\text{H}$  NMR (500 MHz,  $\text{CDCl}_3$ ):  $\delta$  4.99 (brs, 1H), 7.04–7.08 (m, 2H), 7.33–7.36 (m, 2H), 7.46 (dd,  $J = 8.4$  Hz,  $J_{\text{HF}} = 7.2$  Hz, 1H), 7.57–7.63 (m, 2H), 7.75 (d,  $J = 8.5$  Hz, 1H), 7.90–7.92 (m, 1H), 8.17–8.19 (m, 1H).  $^{13}\text{C}$  NMR (126 MHz,  $\text{CDCl}_3$ ):  $\delta$  116.1, 118.3 (d,  $J_{\text{CF}} = 15$  Hz), 120.79, 120.84, 122.4, 123.8 (d,  $J_{\text{CF}} = 17$  Hz), 124.2, 126.7, 127.2, 127.4 (d,  $J_{\text{CF}} = 3$  Hz), 128.1 (d,  $J_{\text{CF}} = 4$  Hz), 129.7, 131.2, 134.5 (d,  $J_{\text{CF}} = 5$  Hz), 152.9, 155.2 (d,  $J = 253$  Hz).  $^{19}\text{F}$  NMR (470 MHz,  $\text{CDCl}_3$ ):  $\delta$  37.8 (d,  $J_{\text{FH}} = 7$  Hz, 1F). IR (neat):  $\nu$  3537, 3423, 3059, 1448, 1379, 1282, 1176, 1049, 889, 808, 783, 748, 715, 667, 602, 565  $\text{cm}^{-1}$ . HRMS (EI+):  $m/z$  Calcd. for  $\text{C}_{16}\text{H}_{11}\text{FO}$   $[\text{M}]^+$ : 238.0794; Found: 238.0802.

## 2-(1-Fluoronaphthalen-2-yl)phenyl trifluoromethanesulfonate (5)

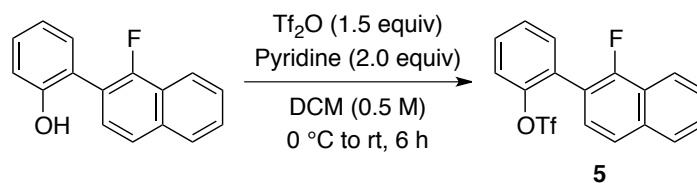

To a dichloromethane (40 mL) solution of 2-(1-fluoronaphthalen-2-yl)phenol (4.77 g, 20.0 mmol) and pyridine (3.22 mL, 39.8 mmol) was added  $\text{Tf}_2\text{O}$  (5.05 mL, 30.0 mmol) dropwise at 0 °C. After stirring at 0 °C for 5 min, the mixture was warmed to room temperature and stirred for

another 6 h. After water (40 mL) was added to the reaction mixture, the organic materials were extracted with dichloromethane thrice. The combined extracts were washed with brine and dried over Na<sub>2</sub>SO<sub>4</sub>. After removing the solvent under reduced pressure, the residue was purified by silica gel column chromatography (hexane/EtOAc = 25:1) to give **5** (7.33 g, 99%) as a white solid.

<sup>1</sup>H NMR (500 MHz, CDCl<sub>3</sub>): δ 7.42 (dd, *J* = 8.5 Hz, *J*<sub>HF</sub> = 7.2 Hz, 1H), 7.45–7.48 (m, 1H), 7.49–7.54 (m, 2H), 7.56–7.58 (m, 1H), 7.59–7.61 (m, 2H), 7.73 (d, *J* = 8.5 Hz, 1H), 7.90–7.92 (m, 1H), 8.17–8.19 (m, 1H). <sup>13</sup>C NMR (126 MHz, CDCl<sub>3</sub>): δ 117.2 (d, *J*<sub>CF</sub> = 14 Hz), 118.3 (q, *J*<sub>CF</sub> = 322 Hz), 121.0 (d, *J*<sub>CF</sub> = 6 Hz), 121.9, 123.5 (d, *J*<sub>CF</sub> = 17 Hz), 123.7 (d, *J*<sub>CF</sub> = 4 Hz), 126.8, 127.49, 127.51, 127.6 (d, *J*<sub>CF</sub> = 2 Hz), 128.4, 129.76, 129.80 (d, *J*<sub>CF</sub> = 12 Hz), 132.7, 134.8 (d, *J*<sub>CF</sub> = 5 Hz), 147.3, 155.3 (d, *J*<sub>CF</sub> = 256 Hz). <sup>19</sup>F NMR (470 MHz, CDCl<sub>3</sub>): δ 37.8 (d, *J*<sub>FH</sub> = 7 Hz, 1F), 87.6 (s, 3F). IR (neat): ν 3068, 1495, 1421, 1383, 1248, 1209, 1138, 1080, 1049, 903, 877, 852, 816, 768, 598 cm<sup>-1</sup>. HRMS (EI+): *m/z* Calcd. for C<sub>17</sub>H<sub>10</sub>F<sub>4</sub>O<sub>3</sub>S [M]<sup>+</sup>: 370.0287; Found: 370.0282.

### 1-Fluoro-2-(4'-methylbiphenyl-2-yl)naphthalene (**1b**)

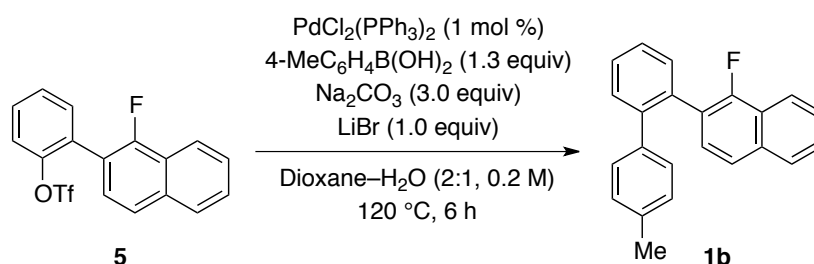

In a Schlenk tube were placed 2-(1-fluoronaphthalen-2-yl)phenyl trifluoromethanesulfonate (**5**, 222 mg, 0.600 mmol), (4-methylphenyl)boronic acid (106 mg, 0.78 mmol), Na<sub>2</sub>CO<sub>3</sub> (191 mg, 1.8 mmol), LiBr (52 mg, 0.60 mmol), and PdCl<sub>2</sub>(PPh<sub>3</sub>)<sub>2</sub> (4.2 mg, 6 μmol). After the tube was purged with nitrogen, a degassed mixture of 1,4-dioxane (2.0 mL) and water (1.0 mL) was added. The mixture was heated at 120 °C for 6 h, and then cooled to room temperature. After aqueous HCl (2 M, 3 mL) was added to the reaction mixture, the organic materials were extracted with dichloromethane thrice. The combined extracts were washed with brine and dried over Na<sub>2</sub>SO<sub>4</sub>. After removing the solvent under reduced pressure, the residue was purified by silica gel column chromatography (hexane/EtOAc = 50:1) to give **1b** (173 mg, 92%) as a white solid.

<sup>1</sup>H NMR (500 MHz, CDCl<sub>3</sub>): δ 2.24 (s, 3H), 6.96 (d, *J* = 8.0 Hz, 2H), 7.07 (d, *J* = 8.0 Hz, 2H), 7.11 (dd, *J* = 8.3 Hz, *J*<sub>HF</sub> = 7.2 Hz, 1H), 7.42–7.53 (m, 7H), 7.78–7.80 (m, 1H), 8.03–8.05 (m, 1H). <sup>13</sup>C NMR (126 MHz, CDCl<sub>3</sub>): δ 21.0, 120.8 (d, *J* = 6 Hz), 122.8, 123.4 (d, *J* = 14 Hz), 123.7 (d, *J* = 17 Hz), 126.2, 126.5, 126.9, 127.3, 128.1, 128.6, 129.1, 130.4, 131.4, 133.87, 133.89, 134.3, 136.2, 138.3, 141.7, 154.9 (d, *J* = 252 Hz). <sup>19</sup>F NMR (470 MHz, CDCl<sub>3</sub>): δ 35.5 (d, *J*<sub>FH</sub> = 7 Hz, 1F). IR (neat): ν 3055, 3022, 2918, 1487, 1464, 1377, 814, 758, 729, 710 cm<sup>-1</sup>. HRMS (EI+): *m/z* Calcd. for C<sub>23</sub>H<sub>17</sub>F [M]<sup>+</sup>: 312.1314; Found: 312.1320.

### 2-(4'-Butylbiphenyl-2-yl)-1-fluoronaphthalene (**1c**)

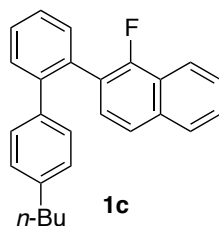

1-Fluoronaphthalene **1c** was prepared by the method described for **1b** using 2-(1-fluoronaphthalen-2-yl)phenyl trifluoromethanesulfonate (**5**, 222 mg, 0.600 mmol), (4-butylphenyl)boronic acid (139 mg, 0.78 mmol), Na<sub>2</sub>CO<sub>3</sub> (191 mg, 1.8 mmol), LiBr (52 mg, 0.60 mmol), and PdCl<sub>2</sub>(PPh<sub>3</sub>)<sub>2</sub> (4.2 mg, 6 μmol). Purification by silica gel column chromatography (hexane/EtOAc = 50:1) gave **1c** (167 mg, 78%) as a colorless oil.

<sup>1</sup>H NMR (500 MHz, CDCl<sub>3</sub>): δ 0.86 (t, *J* = 7.4 Hz, 3H), 1.23–1.30 (m, 2H), 1.48–1.54 (m, 2H), 2.50 (t, *J* = 7.7 Hz, 2H), 6.95 (d, *J* = 8.2 Hz, 2H), 7.07 (d, *J* = 8.2 Hz, 2H), 7.11 (dd, *J* = 8.3, *J*<sub>HF</sub> = 7.4 Hz, 1H), 7.41–7.51 (m, 7H), 7.77–7.80 (m, 1H), 8.02–8.04 (m, 1H). <sup>13</sup>C NMR (126 MHz, CDCl<sub>3</sub>): δ 13.9, 22.3, 33.3, 35.2, 120.8 (d, *J*<sub>CF</sub> = 6 Hz), 122.7 (d, *J*<sub>CF</sub> = 5 Hz), 123.4 (d, *J*<sub>CF</sub> = 15 Hz), 123.7 (d, *J*<sub>CF</sub> = 17 Hz), 126.1 (d, *J*<sub>CF</sub> = 2 Hz), 126.5, 126.9, 127.3 (d, *J*<sub>CF</sub> = 3 Hz), 127.9, 128.1, 129.1, 129.2 (d, *J*<sub>CF</sub> = 4 Hz), 130.4, 131.4, 133.9 (d, *J*<sub>CF</sub> = 5 Hz), 134.4, 138.4, 141.2, 141.8, 154.9 (d, *J*<sub>CF</sub> = 253 Hz). <sup>19</sup>F NMR (470 MHz, CDCl<sub>3</sub>): δ 35.6 (d, *J*<sub>FH</sub> = 7 Hz, 1F). IR (neat): ν 3055, 2954, 2927, 2856, 1604, 1487, 1464, 1377, 1259, 1192, 1059, 814, 760, 744, 602, 565 cm<sup>-1</sup>. HRMS (EI<sup>+</sup>): *m/z* Calcd. for C<sub>26</sub>H<sub>23</sub>F [M]<sup>+</sup>: 354.1784; Found: 354.1768.

### 1-Fluoro-2-(4'-fluorobiphenyl-2-yl)naphthalene (**1d**)

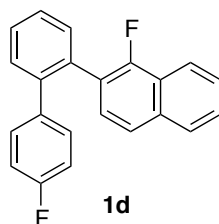

1-Fluoronaphthalene **1d** was prepared by the method described for **1b** using 2-(1-fluoronaphthalen-2-yl)phenyl trifluoromethanesulfonate (**5**, 222 mg, 0.600 mmol), (4-fluorophenyl)boronic acid (109 mg, 0.78 mmol), Na<sub>2</sub>CO<sub>3</sub> (191 mg, 1.8 mmol), LiBr (52 mg, 0.60 mmol), and PdCl<sub>2</sub>(PPh<sub>3</sub>)<sub>2</sub> (4.2 mg, 6 μmol). Purification by silica gel column chromatography (hexane/EtOAc = 50:1) gave **1d** (174 mg, 92%) as a white solid.

<sup>1</sup>H NMR (500 MHz, CDCl<sub>3</sub>): δ 6.84 (dd, *J* = 8.7 Hz, *J*<sub>HF</sub> = 7.9 Hz, 2H), 7.10–7.15 (m, 3H), 7.44–7.53 (m, 7H), 7.79–7.81 (m, 1H), 8.01–8.03 (m, 1H). <sup>13</sup>C NMR (126 MHz, CDCl<sub>3</sub>): δ 114.8 (d, *J*<sub>CF</sub> = 21 Hz), 120.8 (d, *J*<sub>CF</sub> = 6 Hz), 122.99 (d, *J*<sub>CF</sub> = 14 Hz), 123.01 (d, *J*<sub>CF</sub> = 4 Hz), 123.6 (d, *J*<sub>CF</sub> = 17 Hz), 126.3 (d, *J*<sub>CF</sub> = 1 Hz), 126.7, 127.3, 127.4 (d, *J*<sub>CF</sub> = 3 Hz), 128.2, 128.8 (d, *J*<sub>CF</sub> = 4 Hz), 130.2, 130.8 (d, *J*<sub>CF</sub> = 8 Hz), 131.4, 134.0 (d, *J*<sub>CF</sub> = 5 Hz), 134.5, 137.2 (d, *J*<sub>CF</sub> = 3 Hz), 140.7, 154.8 (d, *J*<sub>CF</sub> = 252 Hz), 161.7 (d, *J*<sub>CF</sub> = 247 Hz). <sup>19</sup>F NMR (470 MHz, CDCl<sub>3</sub>): δ 35.9 (d, *J*<sub>FH</sub> = 8 Hz, 1F), 45.58–45.64 (m, 1F). IR (neat): ν 3060, 3020, 1604, 1514, 1487, 1466, 1377, 1223, 1159, 1057, 837, 814,

760, 744  $\text{cm}^{-1}$ . HRMS (EI<sup>+</sup>):  $m/z$  Calcd. for  $\text{C}_{22}\text{H}_{14}\text{F}_2$   $[\text{M}]^+$ : 316.1064; Found: 316.1068.

### 2-(4'-Chlorobiphenyl-2-yl)-1-fluoronaphthalene (**1e**)

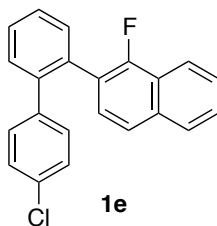

1-Fluoronaphthalene **1e** was prepared by the method described for **1b** using 2-(1-fluoronaphthalen-2-yl)phenyl trifluoromethanesulfonate (**5**, 222 mg, 0.600 mmol), (4-chlorophenyl)boronic acid (122 mg, 0.78 mmol),  $\text{Na}_2\text{CO}_3$  (191 mg, 1.8 mmol), LiBr (52 mg, 0.60 mmol), and  $\text{PdCl}_2(\text{PPh}_3)_2$  (4.2 mg, 6  $\mu\text{mol}$ ). Purification by silica gel column chromatography (hexane/EtOAc = 50:1) gave **1e** (180 mg, 90%) as a white solid.

$^1\text{H}$  NMR (500 MHz,  $\text{CDCl}_3$ ):  $\delta$  7.09–7.13 (m, 5H), 7.45–7.53 (m, 7H), 7.79–7.81 (m, 1H), 8.01–8.03 (m, 1H).  $^{13}\text{C}$  NMR (126 MHz,  $\text{CDCl}_3$ ):  $\delta$  120.8 (d,  $J_{\text{CF}}$  = 6 Hz), 122.8 (d,  $J_{\text{CF}}$  = 15 Hz), 123.1 (d,  $J_{\text{CF}}$  = 4 Hz), 123.6 (d,  $J_{\text{CF}}$  = 17 Hz), 126.4, 126.8, 127.4 (d,  $J_{\text{CF}}$  = 3 Hz), 127.5, 128.1, 128.3, 128.8 (d,  $J_{\text{CF}}$  = 4 Hz), 130.2, 130.5, 131.5, 132.7, 134.0 (d,  $J_{\text{CF}}$  = 5 Hz), 134.4, 139.7, 140.5, 154.8 (d,  $J_{\text{CF}}$  = 252 Hz).  $^{19}\text{F}$  NMR (470 MHz,  $\text{CDCl}_3$ ):  $\delta$  35.9 (d,  $J_{\text{FH}}$  = 7 Hz, 1F). IR (neat):  $\nu$  3060, 3020, 1604, 1514, 1487, 1466, 1377, 1223, 1159, 1157, 837, 814, 760, 744  $\text{cm}^{-1}$ . HRMS (EI<sup>+</sup>):  $m/z$  Calcd. for  $\text{C}_{22}\text{H}_{14}\text{ClF}$   $[\text{M}]^+$ : 332.0768; Found: 332.0770.

### 1-Fluoro-2-(1,1':4',1''-terphenyl-2-yl)naphthalene (**1f**)

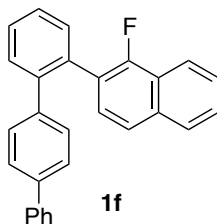

1-Fluoronaphthalene **1f** was prepared by the method described for **1b** using 2-(1-fluoronaphthalen-2-yl)phenyl trifluoromethanesulfonate (**5**, 222 mg, 0.600 mmol), (biphenyl-4-yl)boronic acid (155 mg, 0.78 mmol),  $\text{Na}_2\text{CO}_3$  (191 mg, 1.8 mmol), LiBr (52 mg, 0.60 mmol), and  $\text{PdCl}_2(\text{PPh}_3)_2$  (4.2 mg, 6  $\mu\text{mol}$ ). Purification by silica gel column chromatography (hexane/EtOAc = 50:1) gave **1f** (207 mg, 92%) as a yellow solid.

$^1\text{H}$  NMR (500 MHz,  $\text{CDCl}_3$ ):  $\delta$  7.15 (dd,  $J$  = 8.4 Hz,  $J_{\text{HF}}$  = 7.3 Hz, 1H), 7.24–7.30 (m, 2H), 7.36–7.41 (m, 4H), 7.45–7.57 (m, 10H), 7.78–7.80 (m, 1H), 8.03–8.05 (m, 1H).  $^{13}\text{C}$  NMR (126 MHz,  $\text{CDCl}_3$ ):  $\delta$  120.8 (d,  $J_{\text{CF}}$  = 6 Hz), 123.0 (d,  $J_{\text{CF}}$  = 4 Hz), 123.2 (d,  $J_{\text{CF}}$  = 15 Hz), 123.7 (d,  $J_{\text{CF}}$  = 17 Hz), 126.3, 126.55, 126.64, 126.9, 127.17, 127.23, 127.4 (d,  $J_{\text{CF}}$  = 3 Hz), 128.2, 128.7, 129.1 (d,  $J_{\text{CF}}$  = 4 Hz), 129.7, 130.4, 131.5, 134.0 (d,  $J_{\text{CF}}$  = 5 Hz), 134.4, 139.2, 140.2, 140.6, 141.3, 154.9 (d,  $J_{\text{CF}}$  = 252 Hz).  $^{19}\text{F}$  NMR (470 MHz,  $\text{CDCl}_3$ ):  $\delta$  35.6 (d,  $J_{\text{FH}}$  = 7 Hz, 1F). IR (neat):  $\nu$  3057, 3028, 1603, 1483, 1464, 1377, 1257, 1061, 1007, 908, 841, 816, 752, 729, 698, 565  $\text{cm}^{-1}$ . HRMS (EI<sup>+</sup>):  $m/z$

Calcd. for C<sub>28</sub>H<sub>19</sub>F [M]<sup>+</sup>: 374.1471; Found: 374.1478.

## 2.2 Preparation of 1-Fluoroanthracene 1g

### 2-Benzyl-6-fluorobenzaldehyde

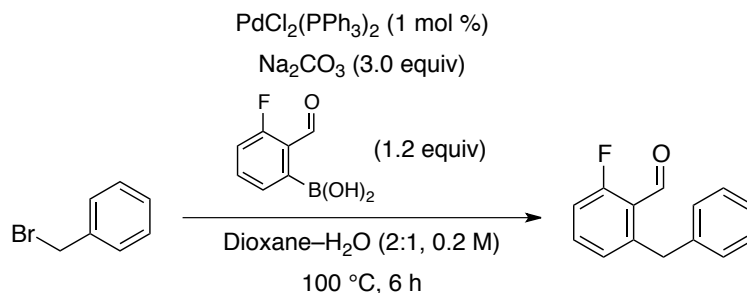

In a flask were placed benzyl bromide (0.299 mL, 2.51 mmol), (3-fluoro-2-formylphenyl)boronic acid (504 mg, 3.00 mmol), Na<sub>2</sub>CO<sub>3</sub> (795 mg, 7.50 mmol), and PdCl<sub>2</sub>(PPh<sub>3</sub>)<sub>2</sub> (18 mg, 25 μmol). After the flask was purged with nitrogen, a degassed mixture of 1,4-dioxane (8.3 mL) and water (4.2 mL) was added. The mixture was heated at 100 °C for 6 h, and then cooled to room temperature. After saturated aqueous NH<sub>4</sub>Cl (15 mL) was added to the reaction mixture, the organic materials were extracted with dichloromethane thrice. The combined extracts were washed with brine and dried over Na<sub>2</sub>SO<sub>4</sub>. After removing the solvent under reduced pressure, the residue was purified by silica gel column chromatography (hexane/EtOAc = 20:1) to give 2-benzyl-6-fluorobenzaldehyde (398 mg, 74%) as a white solid.

<sup>1</sup>H NMR (500 MHz, CDCl<sub>3</sub>): δ 4.43 (s, 2H), 7.00 (d, *J* = 7.9 Hz, 1H), 7.06 (dd, *J*<sub>HF</sub> = 10.7 Hz, *J* = 8.3 Hz, 1H), 7.16 (d, *J* = 8.1 Hz, 2H), 7.20 (t, *J* = 7.4 Hz, 1H), 7.28 (dd, *J* = 8.1, 7.4 Hz, 2H), 7.47 (ddd, *J* = 8.3, 7.9 Hz, *J*<sub>HF</sub> = 5.9 Hz, 1H), 10.52 (s, 1H). <sup>13</sup>C NMR (126 MHz, CDCl<sub>3</sub>): δ 38.6, 114.4 (d, *J*<sub>CF</sub> = 21 Hz), 126.3, 127.3 (d, *J*<sub>CF</sub> = 4 Hz), 128.4, 128.6 (d, *J*<sub>CF</sub> = 15 Hz), 129.0, 135.1 (d, *J*<sub>CF</sub> = 12 Hz), 139.7, 144.8, 166.4 (d, *J*<sub>CF</sub> = 248 Hz), 188.9 (d, *J*<sub>CF</sub> = 11 Hz). <sup>19</sup>F NMR (470 MHz, CDCl<sub>3</sub>): δ 41.0 (dd, *J*<sub>FH</sub> = 11, 6 Hz, 1F). IR (neat): ν 3030, 2791, 1697, 1612, 1572, 1471, 1456, 1417, 1254, 1186, 822, 785, 725, 700 cm<sup>-1</sup>. HRMS (EI<sup>+</sup>): *m/z* Calcd. for C<sub>14</sub>H<sub>11</sub>FO [M]<sup>+</sup>: 214.0794; Found: 214.0803.

### 1-Fluoroanthracene<sup>4</sup>

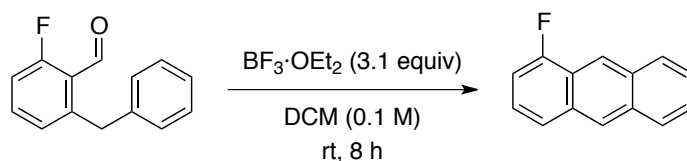

To a dichloromethane (15.0 mL) solution of 2-benzyl-6-fluorobenzaldehyde (321 mg, 1.50 mmol) was added BF<sub>3</sub>·OEt<sub>2</sub> (0.565 mL, 4.58 mmol) at room temperature. After stirring at room temperature for 8 h, the reaction was quenched with saturated aqueous NaHCO<sub>3</sub>. The organic materials were extracted with CH<sub>2</sub>Cl<sub>2</sub> thrice, and the combined extracts were washed with brine and dried over Na<sub>2</sub>SO<sub>4</sub>. After removing the solvent under reduced pressure, the residue was purified by

silica gel column chromatography (hexane) to give 1-fluoroanthracene (244 mg, 83%) as a white solid.

$^1\text{H}$  NMR (500 MHz,  $\text{CDCl}_3$ ):  $\delta$  7.11 (dd,  $J_{\text{HF}} = 10.9$  Hz,  $J = 7.4$  Hz, 1H), 7.37 (ddd,  $J = 8.6$ , 7.4 Hz,  $J_{\text{HF}} = 5.3$  Hz, 1H), 7.49–7.52 (m, 2H), 7.79 (d,  $J = 8.6$  Hz, 1H), 7.99–8.02 (m, 1H), 8.04–8.07 (m, 1H), 8.45 (s, 1H), 8.68 (s, 1H).  $^{13}\text{C}$  NMR (126 MHz,  $\text{CDCl}_3$ ):  $\delta$  107.6 (d,  $J_{\text{CF}} = 20$  Hz), 119.6 (d,  $J_{\text{CF}} = 4$  Hz), 122.9 (d,  $J_{\text{CF}} = 17$  Hz), 124.0 (d,  $J_{\text{CF}} = 4$  Hz), 124.6 (d,  $J_{\text{CF}} = 8$  Hz), 125.9, 126.07, 126.10 (d,  $J_{\text{CF}} = 4$  Hz), 128.1, 128.6, 131.6, 131.1, 132.7 (d,  $J_{\text{CF}} = 4$  Hz), 158.9 (d,  $J_{\text{CF}} = 253$  Hz).  $^{19}\text{F}$  NMR (470 MHz,  $\text{CDCl}_3$ ):  $\delta$  39.2 (dd,  $J_{\text{FH}} = 11$ , 5 Hz, 1F). IR (neat):  $\nu$  3060, 3043, 1639, 1556, 1537, 1460, 1313, 1250, 1200, 1134, 889, 789, 744, 729  $\text{cm}^{-1}$ . HRMS (EI+):  $m/z$  Calcd. for  $\text{C}_{14}\text{H}_9\text{F}$   $[\text{M}]^+$ : 196.0688; Found: 196.0695.

### 1-Fluoro-2-iodonaphthalene (4g)

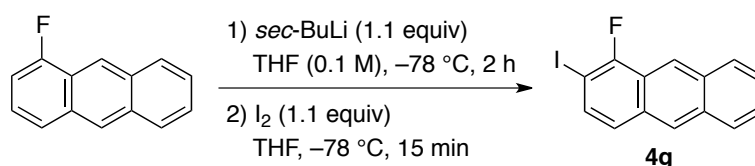

To a THF (12 mL) solution of 1-fluoroanthracene (236 mg, 1.20 mmol) was added *sec*-BuLi (1.03 M in hexane, 1.28 mL, 1.32 mmol) at  $-78$  °C. After stirring at  $-78$  °C for 2 h, a THF (1.3 mL) solution of  $\text{I}_2$  (335 mg, 1.32 mmol) was added to the reaction mixture. The mixture was stirred at  $-78$  °C for another 15 min, and then warmed to room temperature. The reaction was quenched with saturated aqueous  $\text{NaHCO}_3$ , and the organic materials were extracted with ether thrice. The combined extracts were washed with brine and dried over  $\text{Na}_2\text{SO}_4$ . After removing the solvent under reduced pressure, the residue was purified by silica gel column chromatography (hexane) to give **4g** (377 mg, 97%) as a white solid.

$^1\text{H}$  NMR (500 MHz,  $\text{CDCl}_3$ ):  $\delta$  7.51–7.56 (m, 3H), 7.62 (dd,  $J = 9.0$ ,  $J_{\text{HF}} = 5.9$  Hz, 1H), 7.98–8.00 (m, 1H), 8.04–8.06 (m, 1H), 8.41 (s, 1H), 8.62 (s, 1H).  $^{13}\text{C}$  NMR (126 MHz,  $\text{CDCl}_3$ ):  $\delta$  74.1 (d,  $J_{\text{CF}} = 25$  Hz), 119.3 (d,  $J_{\text{CF}} = 3$  Hz), 122.6 (d,  $J_{\text{CF}} = 19$  Hz), 125.3 (d,  $J_{\text{CF}} = 5$  Hz), 126.35 (d,  $J_{\text{CF}} = 3$  Hz), 126.42, 126.5, 128.1, 128.7, 131.8, 132.0 (d,  $J_{\text{CF}} = 4$  Hz), 132.3, 133.1, 158.5 (d,  $J_{\text{CF}} = 252$  Hz).  $^{19}\text{F}$  NMR (470 MHz,  $\text{CDCl}_3$ ):  $\delta$  61.0 (d,  $J_{\text{FH}} = 6$  Hz, 1F). IR (neat):  $\nu$  3049, 1620, 1574, 1533, 1454, 1360, 1309, 1192, 1136, 881, 742, 731  $\text{cm}^{-1}$ . HRMS (EI+):  $m/z$  Calcd. for  $\text{C}_{14}\text{H}_8\text{FI}$   $[\text{M}]^+$ : 321.9655; Found: 321.9660.

### 2-(Biphenyl-2-yl)-1-fluoroanthracene (1g)

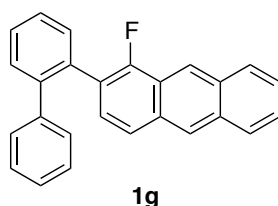

**1g**



1-Fluoroanthracene **1g** was prepared by the method described for **1a** using 1-fluoro-2-iodonaphthalene (**4g**, 193 mg, 0.60 mmol), (biphenyl-2-yl)boronic acid (154 mg, 0.78 mmol), Na<sub>2</sub>CO<sub>3</sub> (191 mg, 1.8 mmol), and PdCl<sub>2</sub>(PPh<sub>3</sub>)<sub>2</sub> (4.2 mg, 6 μmol). Purification by silica gel column chromatography (hexane/EtOAc = 40:1) gave **1g** (149 mg, 71%) as a white solid.

<sup>1</sup>H NMR (500 MHz, CDCl<sub>3</sub>): δ 7.08 (dd, *J* = 8.8 Hz, *J*<sub>HF</sub> = 7.3 Hz, 1H), 7.13–7.15 (m, 3H), 7.21–7.23 (m, 2H), 7.46–7.54 (m, 5H), 7.58–7.61 (m, 2H), 7.97–7.99 (m, 1H), 8.00–8.02 (m, 1H), 8.36 (s, 1H), 8.60 (s, 1H). <sup>13</sup>C NMR (126 MHz, CDCl<sub>3</sub>): δ 119.8 (d, *J*<sub>CF</sub> = 5 Hz), 121.4 (d, *J*<sub>CF</sub> = 15 Hz), 122.9 (d, *J*<sub>CF</sub> = 18 Hz), 123.1 (d, *J*<sub>CF</sub> = 5 Hz), 125.85, 125.89 (d, *J*<sub>CF</sub> = 3 Hz), 126.0, 126.7, 127.2, 127.9, 128.1, 128.2, 128.49, 128.52, 129.3, 130.4, 131.4, 131.7, 131.9 (d, *J*<sub>CF</sub> = 2 Hz), 131.1, 134.4, 141.2, 141.8, 154.7 (d, *J*<sub>CF</sub> = 254 Hz). <sup>19</sup>F NMR (470 MHz, CDCl<sub>3</sub>): δ 36.3 (d, *J*<sub>HF</sub> = 7 Hz). IR (neat): ν 3053, 2924, 2852, 1460, 1430, 1362, 1323, 881, 742, 700 cm<sup>-1</sup>. HRMS (EI<sup>+</sup>): *m/z* Calcd. for C<sub>26</sub>H<sub>17</sub>F [M]<sup>+</sup>: 348.1314; Found: 348.1331.

## 2.3 Preparation of 1-Halonaphthalenes **1h–1j**

### 2-(Biphenyl-2-yl)-1-chloronaphthalene (**1h**)

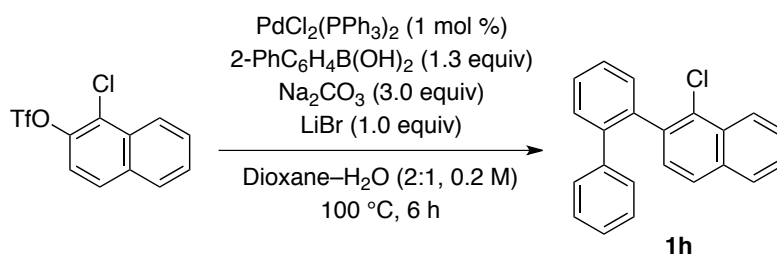

In a flask were placed 1-chloronaphthalen-2-yl trifluoromethanesulfonate (311 mg, 1.00 mmol), (biphenyl-2-yl)boronic acid (257 mg, 1.30 mmol), Na<sub>2</sub>CO<sub>3</sub> (318 mg, 3.00 mmol), LiBr (87 mg, 1.0 mmol), and PdCl<sub>2</sub>(PPh<sub>3</sub>)<sub>2</sub> (7.0 mg, 0.01 mmol). After the flask was purged with nitrogen, a degassed mixture of 1,4-dioxane (3.33 mL) and water (1.67 mL) was added to the flask. The mixture was heated at 100 °C for 6 h, and then cooled to room temperature. After saturated aqueous NH<sub>4</sub>Cl (10 mL) was added to the reaction mixture, the organic materials were extracted with dichloromethane thrice. The combined extracts were washed with brine and dried over Na<sub>2</sub>SO<sub>4</sub>. After removing the solvent under reduced pressure, the residue was purified by silica gel column chromatography (hexane/EtOAc = 50:1) to give **1h** (274 mg, 87%) as a white solid.

<sup>1</sup>H NMR (500 MHz, CDCl<sub>3</sub>): δ 7.10–7.18 (m, 6H), 7.42–7.47 (m, 2H), 7.49–7.53 (m, 3H), 7.57–7.60 (m, 2H), 7.79 (d, *J* = 8.1 Hz, 1H), 8.30 (d, *J* = 8.5 Hz, 1H). <sup>13</sup>C NMR (126 MHz, CDCl<sub>3</sub>): δ 124.8, 126.1, 126.4, 126.6, 126.9, 127.1, 127.8, 128.0, 128.1, 129.1, 129.2, 130.1, 130.4, 131.0, 131.1, 133.4, 137.9, 138.6, 141.0, 141.3. IR (neat): ν 3055, 3022, 1481, 1458, 1331, 1252, 974, 818, 741, 700, 538 cm<sup>-1</sup>. HRMS (EI<sup>+</sup>): *m/z* Calcd. for C<sub>22</sub>H<sub>15</sub>Cl [M]<sup>+</sup>: 314.0862; Found: 314.0863.

## [2-(Biphenyl-2-yl)naphthalen-1-yl]trimethylsilane

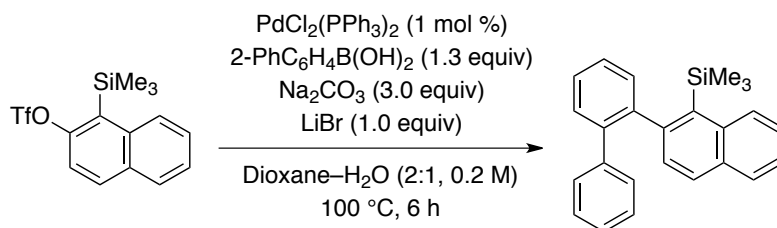

In a flask were placed 1-(trimethylsilyl)naphthalen-2-yl trifluoromethanesulfonate (2.44 g, 7.00 mmol), 2-biphenylboronic acid (1.80 g, 9.09 mmol),  $\text{Na}_2\text{CO}_3$  (2.23 g, 21.0 mmol), LiBr (608 mg, 7.00 mol), and  $\text{PdCl}_2(\text{PPh}_3)_2$  (49 mg, 0.070 mmol). After the flask was purged with nitrogen, a degassed mixture of 1,4-dioxane (23.3 mL) and water (11.7 mL) was added. The mixture was heated at 100 °C for 6 h, and then cooled to room temperature. After saturated aqueous  $\text{NH}_4\text{Cl}$  (40 mL) was added to the reaction mixture, the organic materials were extracted with dichloromethane thrice. The combined extracts were washed with brine and dried over  $\text{Na}_2\text{SO}_4$ . After removing the solvent under reduced pressure, the residue was purified by silica gel column chromatography (hexane/EtOAc = 50:1) to give [2-(biphenyl-2-yl)naphthalen-1-yl]trimethylsilane (2.30 g, 93%) as a white solid.

$^1\text{H}$  NMR (500 MHz,  $\text{CDCl}_3$ ):  $\delta$  0.12 (s, 9H), 7.01 (dd,  $J$  = 8.4, 2.2 Hz, 1H), 7.12–7.13 (m, 2H), 7.18–7.20 (m, 2H), 7.27 (d,  $J$  = 7.6 Hz, 1H), 7.36 (d,  $J$  = 6.6 Hz, 1H), 7.42–7.50 (m, 4H), 7.60 (d,  $J$  = 8.4 Hz, 2H), 7.78 (d,  $J$  = 8.0 Hz, 1H), 8.20 (d,  $J$  = 8.3 Hz, 1H).  $^{13}\text{C}$  NMR (126 MHz,  $\text{CDCl}_3$ ):  $\delta$  2.3, 124.9, 125.1, 126.5, 126.6, 127.8, 127.9, 128.5, 128.6, 128.9, 129.7, 129.8, 130.1, 132.1, 132.2, 135.6, 137.5, 140.0, 140.9, 143.5, 147.7. IR (neat):  $\nu$  3055, 2954, 2895, 1481, 1252, 854, 837, 766, 741, 700  $\text{cm}^{-1}$ . HRMS (EI $^+$ ):  $m/z$  Calcd. for  $\text{C}_{25}\text{H}_{24}\text{Si}$  [ $\text{M}$ ] $^+$ : 352.1647; Found: 352.1646.

## 2-(Biphenyl-2-yl)-1-bromonaphthalene (**1i**)

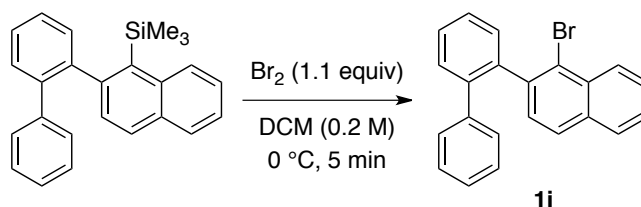

To a dichloromethane (10 mL) solution of [2-(biphenyl-2-yl)naphthalen-1-yl]trimethylsilane (705 mg, 2.00 mmol) was added bromine (113  $\mu\text{L}$ , 2.2 mmol) at 0 °C. After stirring at 0 °C for 5 min, the reaction was quenched with saturated aqueous  $\text{Na}_2\text{S}_2\text{O}_3$ , and the organic materials were extracted with dichloromethane thrice. The combined extracts were washed with brine and dried over  $\text{Na}_2\text{SO}_4$ . After removing the solvent under reduced pressure, the residue was purified by silica gel column chromatography (hexane/EtOAc = 50:1) to give **1i** (635 mg, 88%) as a white solid.

$^1\text{H}$  NMR (500 MHz,  $\text{CDCl}_3$ ):  $\delta$  7.09–7.13 (m, 4H), 7.17–7.20 (m, 2H), 7.39–7.50 (m, 5H), 7.56–7.60 (m, 2H), 7.76 (d,  $J$  = 8.1 Hz, 1H), 8.32 (d,  $J$  = 8.6 Hz, 1H).  $^{13}\text{C}$  NMR (126 MHz,  $\text{CDCl}_3$ ):  $\delta$  123.7, 126.4, 126.6, 126.8, 126.9, 127.4, 127.7, 127.8, 128.07, 128.11, 129.2, 129.3, 130.1, 131.1,

132.3, 133.3, 140.60, 140.64, 140.9, 141.0. IR (neat):  $\nu$  3055, 3020, 1481, 1323, 957, 818, 760, 741, 700  $\text{cm}^{-1}$ . HRMS (EI<sup>+</sup>):  $m/z$  Calcd. for  $\text{C}_{22}\text{H}_{15}^{79}\text{Br}$   $[\text{M}]^+$ : 358.0357; Found: 358.0341.

## 2-(Biphenyl-2-yl)-1-iodonaphthalene (**1j**)

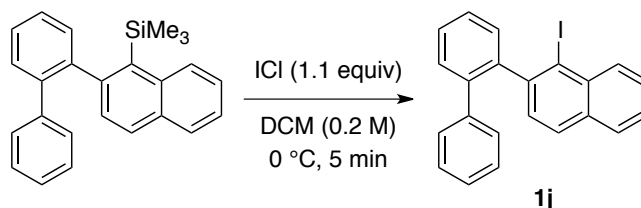

To a dichloromethane (5.0 mL) solution of [2-(biphenyl-2-yl)naphthalen-1-yl]trimethylsilane (705 mg, 2.00 mmol) was added a dichloromethane (5.0 mL) solution of ICl (357 mg, 2.20 mmol) at 0 °C. After stirring at 0 °C for 5 min, the reaction was quenched with saturated aqueous  $\text{Na}_2\text{S}_2\text{O}_3$ , and the organic materials were extracted with dichloromethane thrice. The combined extracts were washed with brine and dried over  $\text{Na}_2\text{SO}_4$ . After removing the solvent under reduced pressure, the residue was purified by silica gel column chromatography (hexane/EtOAc = 50:1) to give **1j** (699 mg, 86%) as a white solid.

$^1\text{H}$  NMR (500 MHz,  $\text{CDCl}_3$ ):  $\delta$  7.09–7.17 (m, 4H), 7.20–7.22 (m, 2H), 7.35 (dd,  $J$  = 7.7, 0.9 Hz, 1H), 7.43–7.58 (m, 5H), 7.62 (d,  $J$  = 8.3 Hz, 1H), 7.72 (d,  $J$  = 8.0 Hz, 1H), 8.24 (d,  $J$  = 8.4 Hz, 1H).  $^{13}\text{C}$  NMR (126 MHz,  $\text{CDCl}_3$ ):  $\delta$  105.6, 126.4, 126.6, 126.9, 127.7, 127.8, 127.9, 128.18, 128.21, 128.5, 129.5, 130.2, 131.3, 132.6, 133.1, 134.9, 140.6, 140.8, 144.2, 145.9. IR (neat):  $\nu$  3055, 3016, 1481, 1448, 1313, 947, 818, 762, 742, 700  $\text{cm}^{-1}$ . HRMS (EI<sup>+</sup>):  $m/z$  Calcd. for  $\text{C}_{22}\text{H}_{15}\text{I}$   $[\text{M}]^+$ : 406.0218; Found: 406.0221.

## 2.4. Preparation of 1-Aminonaphthalene **1k**

### 2-(Biphenyl-2-yl)naphthalen-1-amine (**1k**)

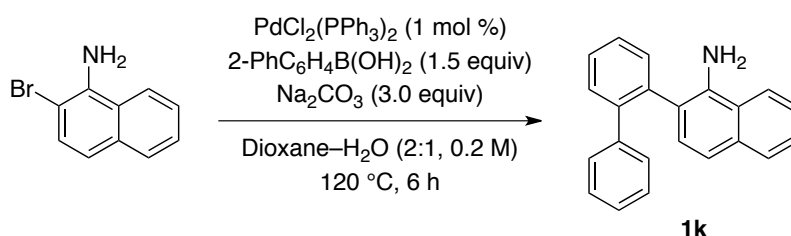

In a flask were placed 2-bromonaphthalen-1-amine (1.11 g, 5.00 mmol), biphenyl-2-ylboronic acid (1.48 g, 7.50 mmol),  $\text{Na}_2\text{CO}_3$  (1.59 g, 15.0 mmol), and  $\text{PdCl}_2(\text{PPh}_3)_2$  (35 mg, 0.050 mmol). After the flask was purged with nitrogen, a degassed mixture of 1,4-dioxane (16.7 mL) and water (8.3 mL) was added to the flask. The mixture was heated at 120 °C for 6 h and then cooled to room temperature. After saturated aqueous  $\text{NH}_4\text{Cl}$  was added to the reaction mixture, the organic materials were extracted with dichloromethane thrice. The combined extracts were washed with brine and dried over  $\text{Na}_2\text{SO}_4$ . After removing the solvent under reduced pressure, the residue was purified by silica gel column chromatography (hexane/EtOAc = 7:1) to give **1k** (1.34 g, 91%) as a

pale purple solid.

$^1\text{H}$  NMR (500 MHz,  $\text{CDCl}_3$ ):  $\delta$  7.05 (d,  $J$  = 8.3 Hz, 1H), 7.12–7.14 (m, 3H), 7.19–7.22 (m, 3H), 7.42–7.44 (m, 2H), 7.46–7.50 (m, 3H), 7.54 (d,  $J$  = 6.9 Hz, 1H), 7.74–7.76 (m, 1H), 7.79–7.80 (m, 1H).  $^{13}\text{C}$  NMR (126 MHz,  $\text{CDCl}_3$ ):  $\delta$  118.2, 121.0, 121.8, 123.5, 124.9, 125.5, 126.7, 127.8, 127.9, 128.0, 128.4, 129.0, 129.2, 130.7, 131.5, 133.5, 137.9, 138.5, 141.0, 141.8. IR (neat):  $\nu$  3473, 3384, 3055, 3020, 1614, 1398, 804, 764, 740, 700  $\text{cm}^{-1}$ . HRMS (EI+):  $m/z$  Calcd. for  $\text{C}_{22}\text{H}_{17}\text{N}$   $[\text{M}]^+$ : 295.1361; Found: 295.1373.

### 3. $\text{AlCl}_3$ -Mediated Cyclisation of 1-Fluoronaphthalenes 1

#### Benzo[*f*]tetraphene (2a)

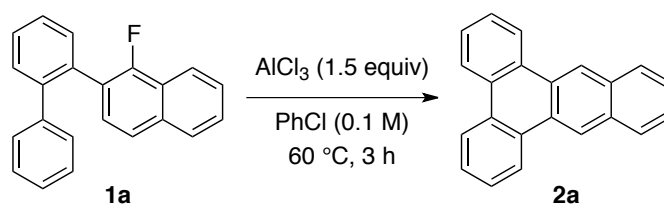

In a Schlenk tube were placed 2-(biphenyl-2-yl)-1-fluoronaphthalene (**1a**, 30 mg, 0.10 mmol) and  $\text{AlCl}_3$  (20 mg, 0.15 mmol). After the tube was purged with nitrogen, chlorobenzene (1.0 mL) was added. The mixture was heated at  $60\text{ }^\circ\text{C}$  for 3 h, and then cooled to room temperature. After aqueous  $\text{NaOH}$  (1 M, 5 mL) was added to the reaction mixture, the organic materials were extracted with dichloromethane thrice. The combined extracts were washed with brine and dried over  $\text{Na}_2\text{SO}_4$ . After removing the solvent under reduced pressure, the residue was purified by silica gel column chromatography (hexane/EtOAc = 20:1) to give **2a** (28 mg, 99%) as a pale yellow solid.

$^1\text{H}$  NMR (500 MHz,  $\text{CDCl}_3$ ):  $\delta$  7.54 (dd,  $J$  = 6.4, 3.3 Hz, 2H), 7.60–7.65 (m, 4H), 8.05 (dd,  $J$  = 6.4, 3.3 Hz, 2H), 8.55 (d,  $J$  = 7.9 Hz, 2H), 8.74 (d,  $J$  = 7.9 Hz, 2H), 9.03 (s, 2H).  $^{13}\text{C}$  NMR (126 MHz,  $\text{CDCl}_3$ ):  $\delta$  122.0, 123.4, 123.6, 126.1, 127.4, 127.6, 128.1, 128.4, 130.0, 130.1, 132.2. IR (neat):  $\nu$  3735, 2927, 1684, 1506, 773, 669  $\text{cm}^{-1}$ . HRMS (APCI+):  $m/z$  Calcd. for  $\text{C}_{22}\text{H}_{14}$   $[\text{M}]^+$ : 278.1096; Found: 293.1090.

#### 2-Methylbenzo[*f*]tetraphene (2b)

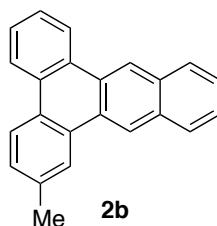

Benzo[*f*]tetraphene **2b** was synthesised by the method described for **2a** using 1-fluoronaphthalene **1b** (63 mg, 0.20 mmol) and  $\text{AlCl}_3$  (40 mg, 0.30 mmol). Purification by silica gel column chromatography (hexane/EtOAc = 20:1) gave **2b** (55 mg, 94%) as a white solid.

$^1\text{H}$  NMR (500 MHz,  $\text{CDCl}_3$ ):  $\delta$  2.63 (s, 3H), 7.46 (dd,  $J$  = 8.3, 1.0 Hz, 1H), 7.54–7.58 (m, 2H),

7.61–7.65 (m, 2H), 8.07–8.10 (m, 2H), 8.46 (d,  $J = 8.3$  Hz, 1H), 8.53–8.55 (m, 1H), 8.56 (brs, 1H), 8.74–8.78 (m, 1H), 9.07 (s, 1H), 9.07 (s, 1H).  $^{13}\text{C}$  NMR (126 MHz,  $\text{CDCl}_3$ ):  $\delta$  21.8, 121.9, 122.0, 123.2, 123.4, 123.6, 123.8, 126.00, 126.01, 127.0, 127.6, 127.7, 128.07, 128.08, 128.4, 128.6, 129.0, 129.8, 130.1, 130.2, 132.17, 132.20, 137.2. IR (neat):  $\nu$  3053, 2914, 2854, 1616, 1516, 1491, 1439, 1346, 1242, 879, 814, 762, 717, 692  $\text{cm}^{-1}$ . HRMS (APCI+):  $m/z$  Calcd. for  $\text{C}_{23}\text{H}_{17}$   $[\text{M}+\text{H}]^+$ : 293.1330; Found: 293.1322.

## 2-Butylbenzo[*f*]tetraphene (2c)

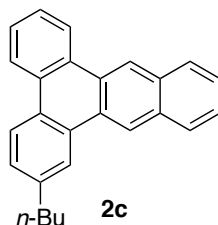

Benzo[*f*]tetraphene **2c** was synthesised by the method described for **2a** using 1-fluoronaphthalene **1c** (71 mg, 0.20 mmol),  $\text{AlCl}_3$  (40 mg, 0.30 mmol), and HFIP (2.0 mL). Purification by silica gel column chromatography (hexane/EtOAc = 20:1) gave **2c** (63 mg, 94%) as a white solid.

$^1\text{H}$  NMR (500 MHz,  $\text{CDCl}_3$ ):  $\delta$  1.01 (t,  $J = 7.5$  Hz, 3H), 1.48 (tq,  $J = 7.8, 7.5$  Hz, 2H), 1.79 (tt,  $J = 7.8, 7.8$  Hz, 2H), 2.89 (t,  $J = 7.8$  Hz, 2H), 7.48 (dd,  $J = 8.3, 1.7$  Hz, 1H), 7.54–7.57 (m, 2H), 7.61–7.64 (m, 2H), 8.07–8.11 (m, 2H), 8.48 (d,  $J = 8.4$  Hz, 1H), 8.53–8.55 (m, 2H), 8.74–8.76 (m, 1H), 9.07 (s, 1H), 9.08 (s, 1H).  $^{13}\text{C}$  NMR (126 MHz,  $\text{CDCl}_3$ ):  $\delta$  14.0, 22.5, 33.8, 36.0, 121.9, 122.0, 123.21, 123.21, 123.4, 123.6, 125.97, 125.99, 127.0, 127.6, 127.9, 128.05, 128.09, 128.3, 128.5, 128.6, 129.8, 130.0, 130.2, 132.15, 132.19, 142.2. IR (neat):  $\nu$  3053, 2954, 2927, 2856, 1614, 1491, 1454, 1412, 876, 764, 719  $\text{cm}^{-1}$ . HRMS (APCI+):  $m/z$  Calcd. for  $\text{C}_{26}\text{H}_{23}$   $[\text{M}+\text{H}]^+$ : 335.1800; Found: 335.1806.

## 2-Fluorobenzo[*f*]tetraphene (2d)

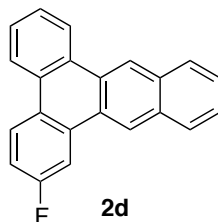

Benzo[*f*]tetraphene **2d** was synthesised by the method described for **2a** using 1-fluoronaphthalene **1d** (63 mg, 0.20 mmol) and  $\text{AlCl}_3$  (40 mg, 0.30 mmol). Purification by silica gel column chromatography (hexane/EtOAc = 20:1) gave **2d** (57 mg, 96%) as a white solid.

$^1\text{H}$  NMR (500 MHz,  $\text{CDCl}_3$ ):  $\delta$  7.33 (ddd,  $J_{\text{HF}} = 10.6$  Hz,  $J = 8.5, 2.5$  Hz, 1H), 7.55–7.59 (m, 2H), 7.60–7.65 (m, 2H), 8.05–8.07 (m, 2H), 8.33 (dd,  $J = 11.0$  Hz,  $J_{\text{HF}} = 2.5$  Hz, 1H), 8.44–8.46 (m, 1H), 8.50 (dd,  $J = 8.5$  Hz,  $J_{\text{HF}} = 5.9$  Hz, 1H), 8.71–8.72 (m, 1H), 8.89 (s, 1H), 9.02 (s, 1H).  $^{13}\text{C}$  NMR (126 MHz,  $\text{CDCl}_3$ ):  $\delta$  109.3 (d,  $J_{\text{CF}} = 23$  Hz), 115.5 (d,  $J_{\text{CF}} = 23$  Hz), 122.2, 122.4, 123.2, 123.7, 125.6 (d,  $J_{\text{CF}} = 9$  Hz), 126.3, 126.4, 126.5 (d,  $J_{\text{CF}} = 3$  Hz), 127.3, 127.6 (d,  $J = 3$  Hz), 127.7, 128.07,

128.11, 128.5, 129.5, 129.6, 132.1, 132.2 (d,  $J_{\text{CF}} = 7$  Hz), 132.5, 162.4 (d,  $J_{\text{CF}} = 246$  Hz).  $^{19}\text{F}$  NMR (470 MHz,  $\text{CDCl}_3$ ):  $\delta$  47.56–47.61 (m, 1F). IR (neat):  $\nu$  3051, 1616, 1516, 1493, 1462, 1279, 1213, 1188, 876, 856, 764  $\text{cm}^{-1}$ . HRMS (EI $^{+}$ ):  $m/z$  Calcd. for  $\text{C}_{22}\text{H}_{13}\text{F}$   $[\text{M}]^{+}$ : 296.1001; Found: 296.0999.

### 2-Chlorobenzo[*f*]tetraphene (**2e**)

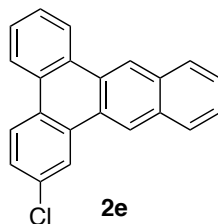

Benzo[*f*]tetraphene **2e** was synthesised by the method described for **2a** using 1-fluoronaphthalene **1e** (67 mg, 0.20 mmol) and  $\text{AlCl}_3$  (40 mg, 0.30 mmol). Purification by silica gel column chromatography (hexane/EtOAc = 20:1) gave **2e** (60 mg, 95%) as a white solid.

$^1\text{H}$  NMR (500 MHz,  $\text{CDCl}_3$ ):  $\delta$  7.53–7.60 (m, 3H), 7.61–7.66 (m, 2H), 8.02–8.08 (m, 2H), 8.42 (d,  $J = 8.8$  Hz, 1H), 8.45 (d,  $J = 7.7$  Hz, 1H), 8.62 (d,  $J = 1.7$  Hz, 1H), 8.69 (d,  $J = 7.7$  Hz, 1H), 8.89 (s, 1H), 8.98 (s, 1H).  $^{13}\text{C}$  NMR (126 MHz,  $\text{CDCl}_3$ ):  $\delta$  122.1, 122.3, 123.3, 123.4, 123.7, 124.9, 126.3, 126.4, 127.2, 127.66, 127.70, 127.71, 128.06, 128.13, 128.38, 128.45, 129.2, 130.0, 131.6, 132.1, 132.5, 133.5. IR (neat):  $\nu$  3053, 2924, 1730, 1599, 1506, 1487, 1431, 1103, 876, 762, 715, 690  $\text{cm}^{-1}$ . HRMS (EI $^{+}$ ):  $m/z$  Calcd. for  $\text{C}_{22}\text{H}_{14}\text{Cl}$   $[\text{M}+\text{H}]^{+}$ : 313.0784; Found: 313.0792.

### 2-Phenylbenzo[*f*]tetraphene (**2f**)

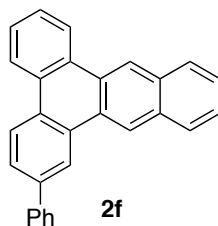

Benzo[*f*]tetraphene **2f** was synthesised by the method described for **2a** using 1-fluoronaphthalene **1f** (75 mg, 0.20 mmol) and  $\text{AlCl}_3$  (40 mg, 0.30 mmol). Purification by silica gel column chromatography (hexane/EtOAc = 20:1) gave **2d** (65 mg, 91%) as a white solid.

$^1\text{H}$  NMR (500 MHz,  $\text{CDCl}_3$ ):  $\delta$  7.45 (t,  $J = 7.6$  Hz, 1H), 7.55–7.58 (m, 3H), 7.66–7.74 (m, 3H), 7.85 (d,  $J = 7.4$  Hz, 2H), 7.88 (d,  $J = 8.6$  Hz, 1H), 8.07–8.13 (m, 2H), 8.59–8.61 (m, 1H), 8.64 (d,  $J = 8.6$  Hz, 1H), 8.78–8.79 (m, 1H), 8.95 (brs, 1H), 9.10 (s, 1H), 9.15 (s, 1H).  $^{13}\text{C}$  NMR (126 MHz,  $\text{CDCl}_3$ ):  $\delta$  122.1, 122.17, 122.23, 123.5, 123.7, 124.0, 126.16, 126.17, 126.7, 127.4, 127.5, 127.6, 127.7, 128.10, 128.11, 128.5, 128.6, 129.0, 129.2, 129.9, 130.1, 130.4, 132.2, 132.3, 140.2, 141.2. IR (neat):  $\nu$  3051, 3030, 1485, 872, 756, 715, 692  $\text{cm}^{-1}$ . HRMS (EI $^{+}$ ):  $m/z$  Calcd. for  $\text{C}_{28}\text{H}_{19}$   $[\text{M}+\text{H}]^{+}$ : 355.1487; Found: 355.1482.

## Dibenzo[*a,c*]tetracene (**2g**)

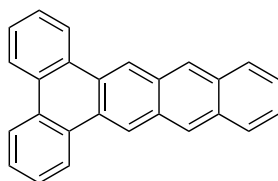

**2g**

Dibenzo[*a,c*]tetraphene (**2g**) was synthesised by the method described for **2a** using 1-fluoronaphthalene **1c** (70 mg, 0.20 mmol), AlCl<sub>3</sub> (40 mg, 0.30 mmol), and HFIP (2.0 mL). Purification by silica gel column chromatography (hexane/EtOAc = 20:1) gave **2g** (63 mg, 96%) as a white solid.

<sup>1</sup>H NMR (500 MHz, CDCl<sub>3</sub>): δ 7.48 (dd, *J* = 6.5, 3.1 Hz, 2H), 7.62–7.67 (m, 4H), 8.07 (dd, *J* = 6.3, 2.8 Hz, 2H), 8.53 (d, *J* = 7.6 Hz, 2H), 8.69 (s, 2H), 8.78 (d, *J* = 8.5 Hz, 2H), 9.24 (s, 2H). <sup>13</sup>C NMR (126 MHz, CDCl<sub>3</sub>): δ 122.0, 123.4, 123.7, 125.3, 126.3, 127.6, 127.8, 128.2, 128.4, 130.2, 130.3, 130.5, 131.9. IR (neat): ν 2918, 2854, 1722, 1431, 1279, 891, 746, 729 cm<sup>-1</sup>. HRMS (EI<sup>+</sup>): *m/z* Calcd. for C<sub>26</sub>H<sub>16</sub> [M]<sup>+</sup>: 328.1252; Found: 328.1244.

## 4. γ-Al<sub>2</sub>O<sub>3</sub>-Cyclisation of 1-Fluoronaphthalenes **1**

### Benzo[*g*]chrysene (**3a**)

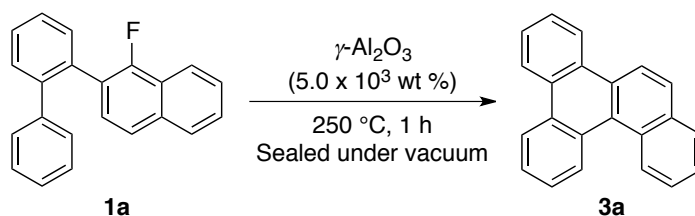

γ-Al<sub>2</sub>O<sub>3</sub> (1.00 g) was activated by annealing at 500 °C for 30 min under vacuum (~10<sup>-2</sup> mbar) in a glass ampule. To the ampule was added **1a** (20 mg, 0.067 mmol) under argon atmosphere, and the mixture was shaken for 2–3 min. The ampule was then evacuated (~10<sup>-2</sup> mbar) and sealed. The mixture was heated at 250 °C for 1 h, and then cooled to room temperature. The reaction mixture was filtered through a glass filter (dichloromethane), and the filtrate was concentrated under reduced pressure to give **3a** (18 mg, 95%) as a white solid.

<sup>1</sup>H NMR (500 MHz, CDCl<sub>3</sub>): δ 7.58–7.72 (m, 6H), 7.99–8.02 (m, 2H), 8.61 (d, *J* = 8.9 Hz, 1H), 8.65–8.67 (m, 1H), 8.70–8.72 (m, 1H), 8.74 (d, *J* = 8.1 Hz, 1H), 8.91 (d, *J* = 8.2 Hz, 1H), 8.95 (d, *J* = 8.3 Hz, 1H). <sup>13</sup>C NMR (126 MHz, CDCl<sub>3</sub>): δ 120.7, 123.0, 123.4, 123.7, 125.8, 125.9, 126.0, 126.6, 127.0, 127.21, 127.24, 127.6, 128.0, 128.1, 128.4, 129.3, 129.4, 129.7, 129.9, 130.1, 130.8, 133.5. IR (neat): ν 3055, 1493, 1479, 1450, 818, 758, 723 cm<sup>-1</sup>. HRMS (APCI<sup>+</sup>): *m/z* Calcd. for C<sub>22</sub>H<sub>14</sub> [M]<sup>+</sup>: 278.1096; Found: 278.1083.

## 12-Methylbenzo[g]chrysene (**3b**) and 13-Methylbenzo[g]chrysene (**3b'**)

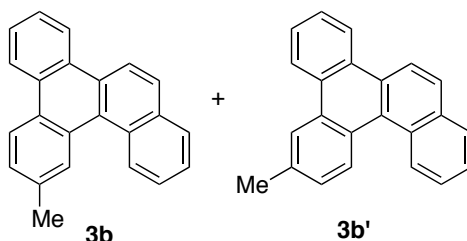

A mixture of benzo[g]chrysenes **3b** and **3b'** was synthesised by the method described for **3a** using 1-fluoronaphthalene **1b** (20 mg, 0.064 mmol) and  $\gamma$ -Al<sub>2</sub>O<sub>3</sub> (1.00 g). The reaction mixture was filtered through a glass filter (dichloromethane), and the filtrate was concentrated under reduced pressure to give a mixture of **3b** and **3b'** (14 mg, 73%, 64:36) as a white solid.

**3b** + **3b'**: IR (neat):  $\nu$  3053, 2916, 2854, 1610, 1498, 1473, 1444, 1379, 1244, 906, 812, 789, 758, 725 cm<sup>-1</sup>. HRMS (APCI+):  $m/z$  Calcd. for C<sub>23</sub>H<sub>17</sub> [M+H]<sup>+</sup>: 293.1330; Found: 293.1318.

**3b**: <sup>1</sup>H NMR (500 MHz, CDCl<sub>3</sub>):  $\delta$  2.61 (s, 3H), 7.51 (d,  $J$  = 8.3 Hz, 1H), 7.57–7.70 (m, 4H), 7.96–8.02 (m, 2H), 8.60 (d,  $J$  = 8.9 Hz, 1H), 8.61–8.71 (m, 4H), 8.96 (d,  $J$  = 8.4 Hz, 1H). <sup>13</sup>C NMR (126 MHz, CDCl<sub>3</sub>):  $\delta$  21.8, 120.8, 122.9, 123.4, 123.7, 125.7, 125.9, 126.9, 127.1, 127.2, 127.5, 128.10, 128.10, 128.12, 128.4, 128.6, 129.2, 129.4, 129.5, 130.0, 130.3, 133.5, 135.8.

**3b'**: <sup>1</sup>H NMR (500 MHz, CDCl<sub>3</sub>):  $\delta$  2.65 (s, 3H), 7.47 (d,  $J$  = 8.4 Hz, 1H), 7.57–7.70 (m, 4H), 7.96–8.02 (m, 2H), 8.53 (s, 1H), 8.59–8.71 (m, 3H), 8.79 (d,  $J$  = 8.4 Hz, 1H), 8.93 (d,  $J$  = 8.7 Hz, 1H). <sup>13</sup>C NMR (126 MHz, CDCl<sub>3</sub>):  $\delta$  21.8, 120.8, 123.1, 123.4, 123.7, 125.77, 125.83, 127.0, 127.18, 127.20, 127.3, 127.4, 127.5, 127.6, 128.1, 128.4, 129.3, 129.8, 129.9, 130.2, 130.9, 133.5, 136.4.

## Chlorobenzo[g]chrysenes **3e** and **3e'**

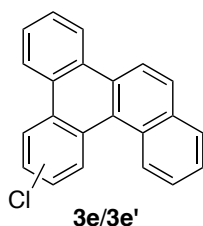

A mixture of benzo[g]chrysenes **3e** and **3e'** was synthesised by the method described for **3a** using 1-fluoronaphthalene **1e** (20 mg, 0.060 mmol) and  $\gamma$ -Al<sub>2</sub>O<sub>3</sub> (1.00 g). The reaction mixture was filtered through a glass filter (dichloromethane), and the filtrate was concentrated under reduced pressure to give a mixture of **3e** and **3e'** (14 mg, 75%, 75:25) as a white solid.

**3e** + **3e'**: IR (neat):  $\nu$  3059, 2922, 2850, 1714, 1595, 1489, 1473, 1439, 1265, 1095, 810, 762, 719 cm<sup>-1</sup>. HRMS (APCI+):  $m/z$  Calcd. for C<sub>22</sub>H<sub>14</sub>Cl [M+H]<sup>+</sup>: 313.0784; Found: 313.0773.

**3e**: <sup>1</sup>H NMR (500 MHz, CDCl<sub>3</sub>):  $\delta$  7.56–7.74 (m, 5H), 7.99–8.02 (m, 2H), 8.56–8.66 (m, 4H), 8.86 (d,  $J$  = 5.3 Hz, 1H), 8.87 (s, 1H). <sup>13</sup>C NMR (126 MHz, CDCl<sub>3</sub>):  $\delta$  120.6, 123.0, 123.8, 125.1, 126.08, 126.12, 126.5, 126.8, 127.4, 127.6, 127.8, 128.27, 128.34, 128.5, 128.6, 129.2, 129.4, 129.7, 130.0, 130.7, 132.2, 133.5.

**3e'**: <sup>1</sup>H NMR (500 MHz, CDCl<sub>3</sub>):  $\delta$  7.56–7.74 (m, 5H), 7.99–8.02 (m, 2H), 8.56–8.66 (m, 4H), 8.80



(d,  $J = 8.9$  Hz, 1H), 8.82 (d,  $J = 8.8$  Hz, 1H).  $^{13}\text{C}$  NMR (126 MHz,  $\text{CDCl}_3$ ):  $\delta$  120.7, 123.16, 123.17, 123.8, 126.0, 126.2, 126.3, 126.7, 127.3, 127.8, 127.9, 127.96, 128.04, 128.1, 128.2, 128.9, 130.0, 130.1, 130.8, 132.2, 132.6, 133.6.

### Dibenzo[*a,c*]tetraphene (**3g**)

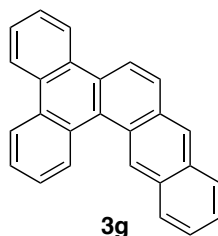

Dibenzo[*a,c*]tetraphene (**3g**) was synthesised by the method described for **3a** using 1-fluoroanthracene **1g** (20 mg, 0.057 mmol) and  $\gamma\text{-Al}_2\text{O}_3$  (1.00 g). The reaction mixture was filtered through a glass filter (dichloromethane), and the filtrate was concentrated under reduced pressure to give **3g** (13.8 mg, 73%) as a pale yellow solid.

$^1\text{H}$  NMR (500 MHz,  $\text{CDCl}_3$ ):  $\delta$  7.53–7.58 (m, 2H), 7.69–7.75 (m, 4H), 8.08–8.11 (m, 3H), 8.52 (s, 1H), 8.54 (d,  $J = 9.2$  Hz, 1H), 8.64–8.67 (m, 1H), 8.74–8.77 (m, 1H), 8.79 (dd,  $J = 7.8, 1.7$  Hz, 1H), 9.08 (dd,  $J = 7.7, 1.5$  Hz, 1H), 9.48 (s, 1H).  $^{13}\text{C}$  NMR (126 MHz,  $\text{CDCl}_3$ ):  $\delta$  120.9, 123.1, 123.5, 123.8, 125.6, 125.9, 126.0, 126.3, 126.5, 127.0, 127.1, 127.3, 127.5, 127.8, 127.9, 128.1, 128.5, 128.7, 129.0, 129.6, 129.7, 130.1, 130.9, 131.4, 131.7, 131.8. IR (neat):  $\nu$  3053, 2927, 2850, 1496, 1433, 906, 885, 754, 739  $\text{cm}^{-1}$ . HRMS (APCI+):  $m/z$  Calcd. for  $\text{C}_{26}\text{H}_{16}$   $[\text{M}]^+$ : 328.1252; Found: 328.1243.

### 5. Mechanistic Study 1: $\text{AlCl}_3$ -Mediated Cyclisation of Halonaphthalenes **1h–1j**

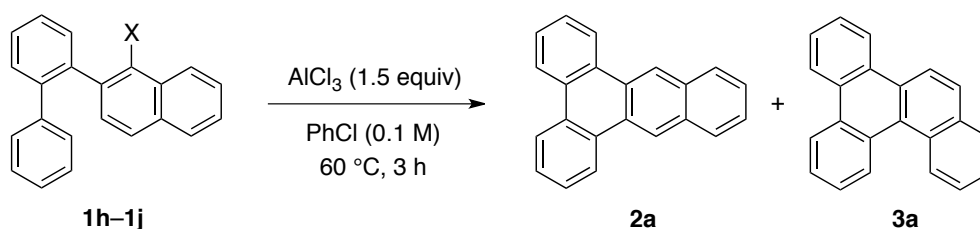

In a Schlenk tube were placed 2-(biphenyl-2-yl)-1-halonaphthalene **1h**, **1i**, or **1j** (0.10 mmol) and  $\text{AlCl}_3$  (20 mg, 0.15 mmol). After the tube was purged with nitrogen, chlorobenzene (1.0 mL) was added. The mixture was heated at 60  $^\circ\text{C}$  for 3 h, and then cooled to room temperature. After aqueous NaOH (1 M, 5 mL) was added to the reaction mixture, the organic materials were extracted with dichloromethane thrice. The combined extracts were washed with brine and dried over  $\text{Na}_2\text{SO}_4$ . After removing the solvent under reduced pressure, the yields of **2a** and **3a** were determined by  $^1\text{H}$  NMR measurement using  $\text{CH}_2\text{Br}_2$  as an internal standard.

## 6. Mechanistic Study 2: Cyclisation of Diazonium Salt

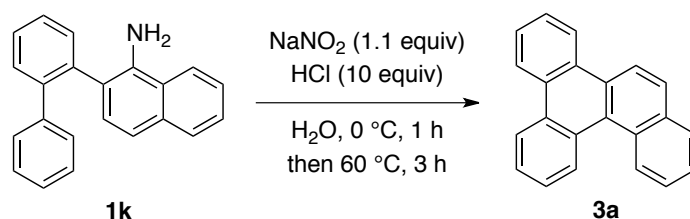

In a two-necked flask were placed 2-(biphenyl-2-yl)naphthalen-1-amine (**1k**, 295 mg, 1.00 mmol) and aqueous HCl (2 M, 5.0 mL, 10 mmol) at 0 °C. After stirring at 0 °C for 15 min, NaNO<sub>2</sub> (76 mg, 1.1 mmol) was added. After stirring for another 1 h, the mixture was heated at 60 °C for 3 h, and then cooled to room temperature. After saturated aqueous NaHCO<sub>3</sub> was added to the reaction mixture, the organic materials were extracted with dichloromethane thrice. The combined extracts were washed with brine and dried over Na<sub>2</sub>SO<sub>4</sub>. After removing the solvent under reduced pressure, the residue was purified by silica gel column chromatography (hexane/EtOAc = 25:1) to give **3a** (250 mg, 90%) as a white solid.

## 7. References

- (1) T. Rausis and M. Schlosser, *Eur. J. Org. Chem.*, 2002, 3351–3358.
- (2) J. Barluenga, A. Jiménez-Aquino, F. Aznar and C. Valdés, *J. Am. Chem. Soc.*, 2009, **131**, 4031–4041.
- (3) D. Peña, A. Cobas, D. Pérez and E. Guitián, *Synthesis*, 2002, 1454–1458.
- (4) S. M. Rafiq, R. Sivasakthikumaran, J. Karunakaran and A. K. Mohanakrishnan, *Eur. J. Org. Chem.*, 2015, 5099–5114.

## 8. $^1\text{H}$ , $^{13}\text{C}$ and $^{19}\text{F}$ NMR charts

### 2-(Biphenyl-2-yl)-1-fluoronaphthalene (1a)

$^1\text{H}$

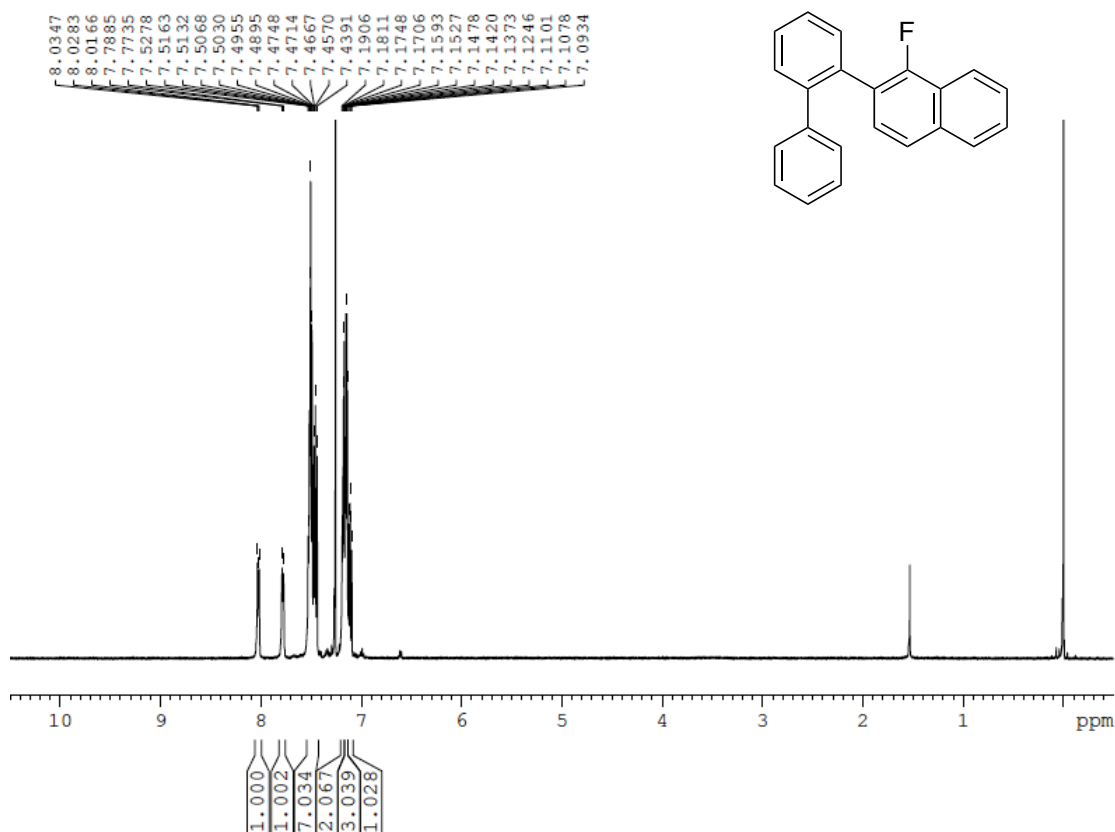

```

NAME      au-150429-pp 1-F-2-Bipht Nig
EXPNO     1
PROCNO    1
Date_     20150420
Time      20.10
INSTRUM    spect
PROBHD     5 mm 500QNP 1H/1
PULPROG    zgpg30
SOLVENT    CDCl3
NS         2
DS         4
SWH         7507.507 Hz
FIDRES     0.14555 Hz
AQ         0.164513 sec
RG          256
SFO         500.132500 MHz
WDW         EM
SSB         0
GB          0
PC          1.00000000
===== CHANNEL f1 =====
NUC1        1H
P1          9.00
PL1         -2.00 dB
SFO1        500.132500 MHz
===== CHANNEL f2 =====
NUC2        13C
P2          9.00
PL2         -2.00 dB
SFO2        125.761400 MHz
===== CHANNEL f3 =====
NUC3        19F
P3          9.00
PL3         -2.00 dB
SFO3        470.133300 MHz

```

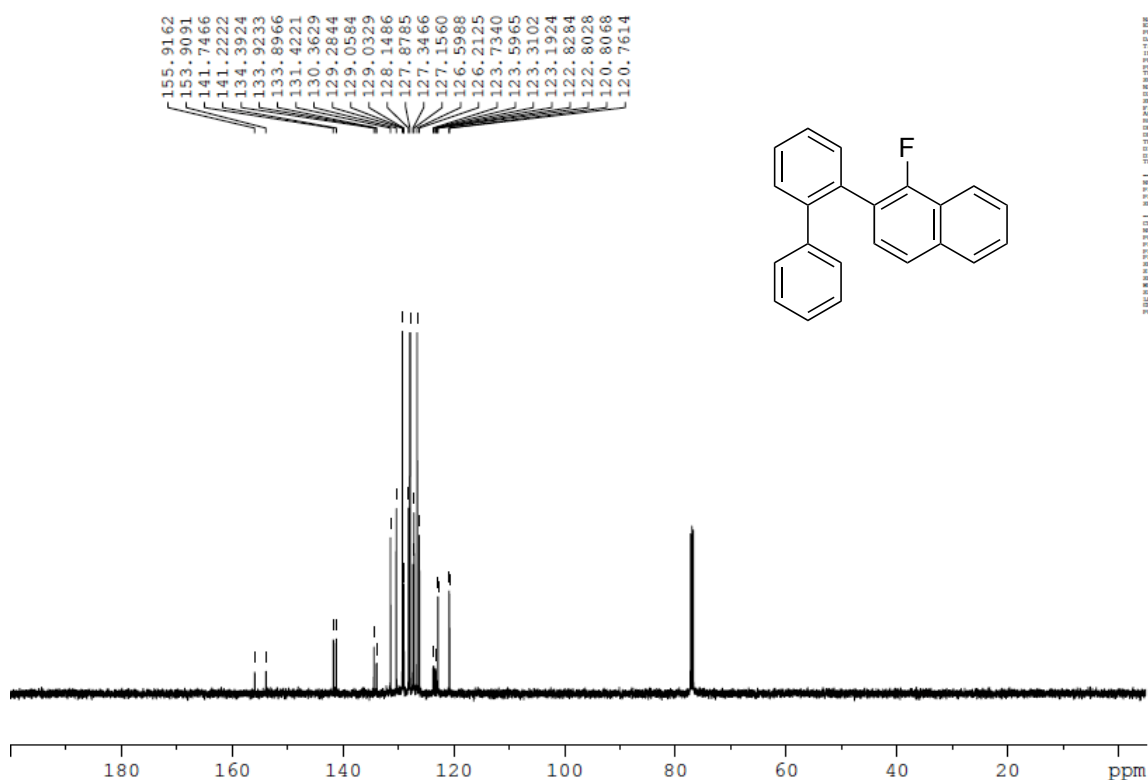

```

NAME      au-150429-pp 1-F-2-Bipht Nig
EXPNO     1
PROCNO    1
Date_     20150420
Time      20.10
INSTRUM    spect
PROBHD     5 mm 500QNP 1H/1
PULPROG    zgpg30
SOLVENT    CDCl3
NS         2
DS         4
SWH         7507.507 Hz
FIDRES     0.14555 Hz
AQ         0.164513 sec
RG          256
SFO         500.132500 MHz
WDW         EM
SSB         0
GB          0
PC          1.00000000
===== CHANNEL f1 =====
NUC1        13C
P1          9.00
PL1         -2.00 dB
SFO1        125.761400 MHz
===== CHANNEL f2 =====
NUC2        19F
P2          9.00
PL2         -2.00 dB
SFO2        470.133300 MHz
===== CHANNEL f3 =====
NUC3        1H
P3          9.00
PL3         -2.00 dB
SFO3        500.132500 MHz

```

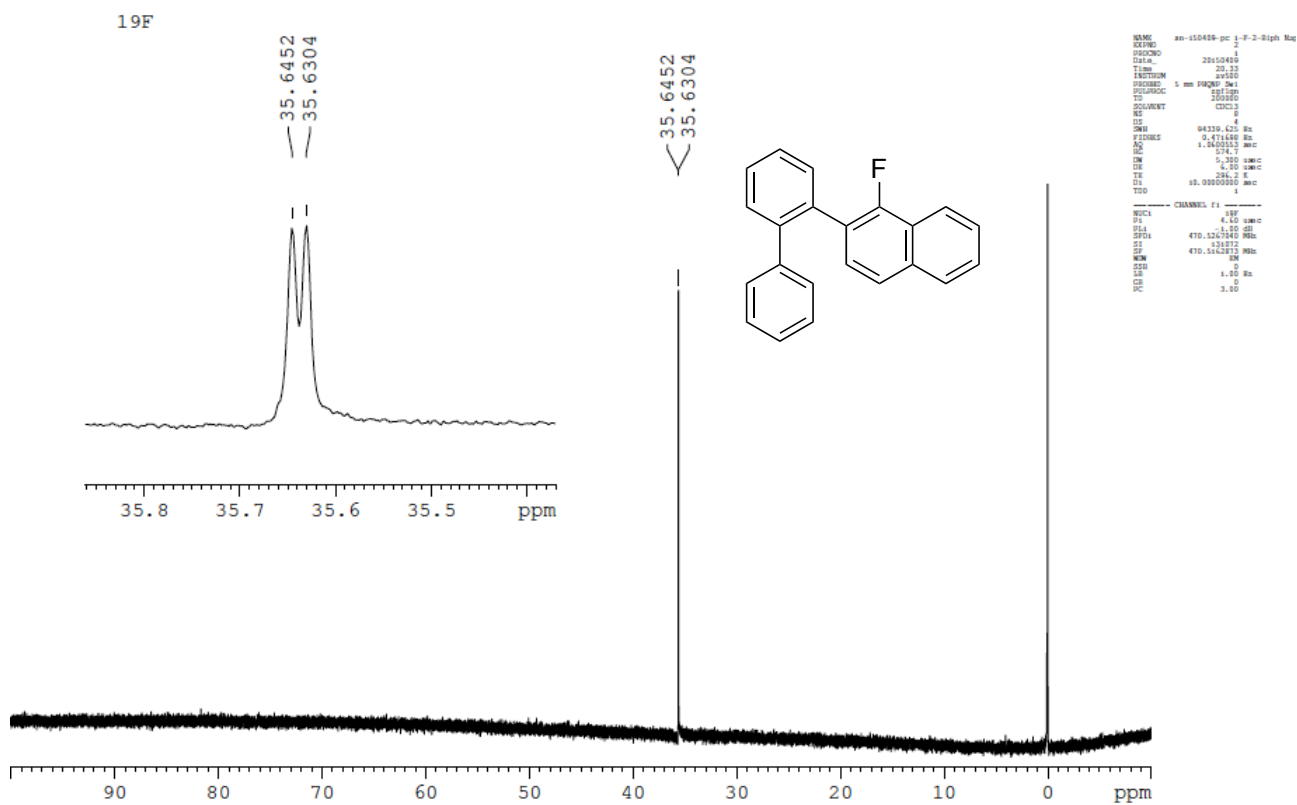

## 2-(1-Fluoronaphthalen-2-yl)phenol

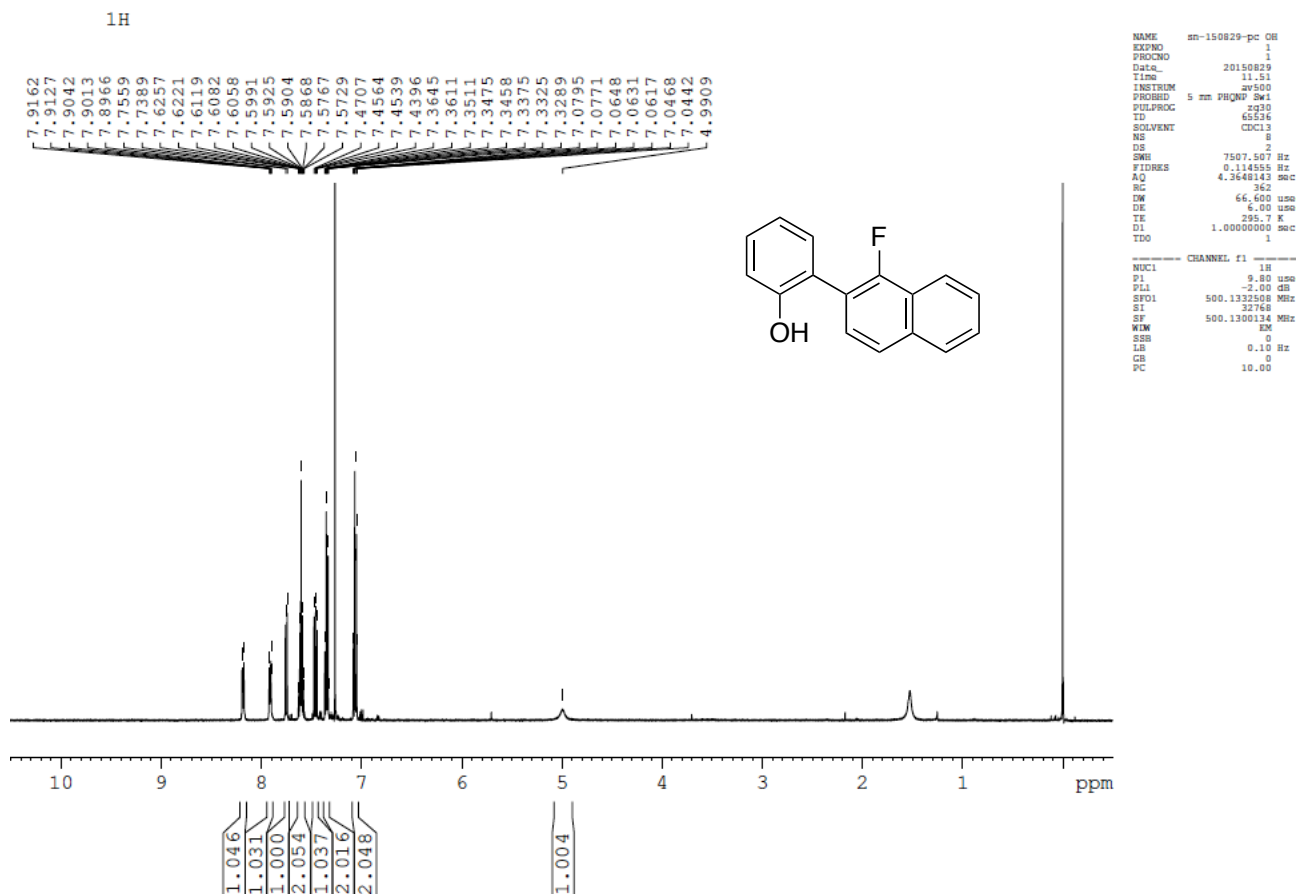

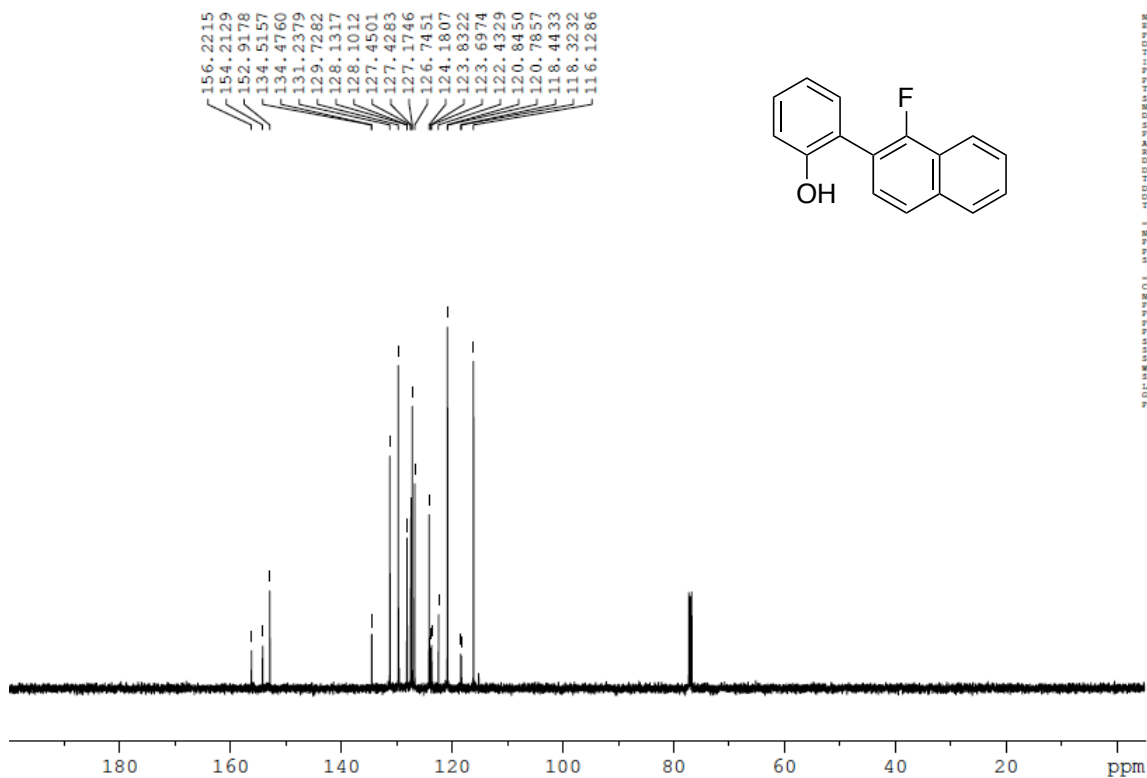

```

NAME      sn-150829-pc OH
EXPNO     1
PROCNO    1
Date_     20150829
Time      12.51
INSTRUM   spect
PROBHD    5 mm PUNIP Sw1
PULPROG   zgpg30
TD         65536
SOLVENT   CDCl3
NS         2
DS         8
SWH        30561.039 Hz
FIDRES     0.466430 Hz
AQ         1.0715799 sec
RG         18390.4
CW         16.350 usec
DE         20.00 usec
TE         296.5 K
D1         1.00000000 sec
D11        0.03000000 sec
TD0        1

===== CHANNEL f1 =====
NUC1       13C
P1         7.10 usec
PL1        -1.00 dB
SFO1       125.7718239 MHz

===== CHANNEL f2 =====
CPDPRG2   waltz16
NUC2       1H
PCPD2      80.00 usec
PL2         -2.00 dB
PL12       16.00 dB
PL13       16.00 dB
SFO2       500.1320005 MHz
SF         125.7576092 MHz
SF         500.1320005 MHz
MCM        RM
SSB         0
LB          1.00 Hz
GB          0
PC          1.40

```

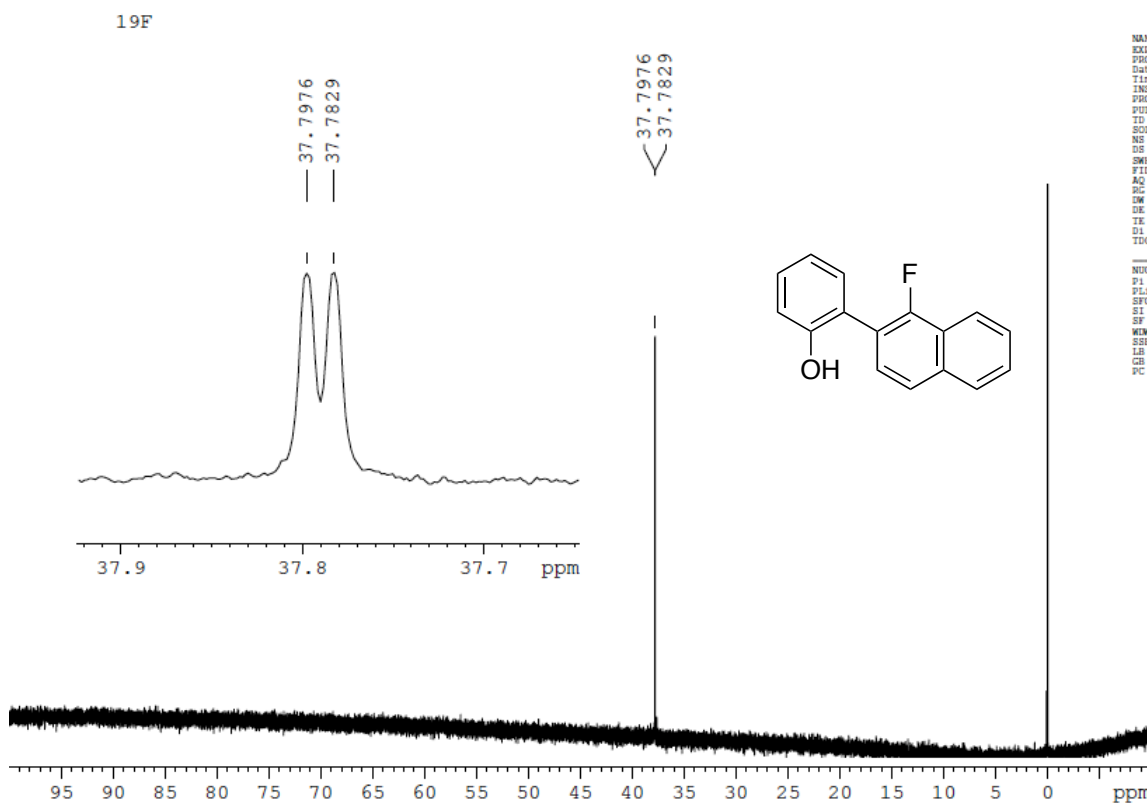

```

NAME      sn-150829-pc OH
EXPNO     2
PROCNO    1
Date_     20150829
Time      11.54
INSTRUM   spect
PROBHD    5 mm PUNIP Sw1
PULPROG   zgpg30
TD         260000
SOLVENT   CDCl3
NS         4
DS         8
SWH        94339.625 Hz
FIDRES     0.471698 Hz
AQ         1.0600553 sec
RG         574.7
CW         5.300 usec
DE         6.00 usec
TE         295.7 K
D1         10.00000000 sec
TD0        1

===== CHANNEL f1 =====
NUC1       19F
P1         4.00 usec
PL1         0.00 dB
SFO1       470.5267040 MHz
SF         470.5162888 MHz
MCM        RM
SSB         0
LB          1.00 Hz
GB          0
PC          3.00

```

2-(1-Fluoronaphthalen-2-yl)phenyl trifluoromethanesulfonate (5)

<sup>1</sup>H

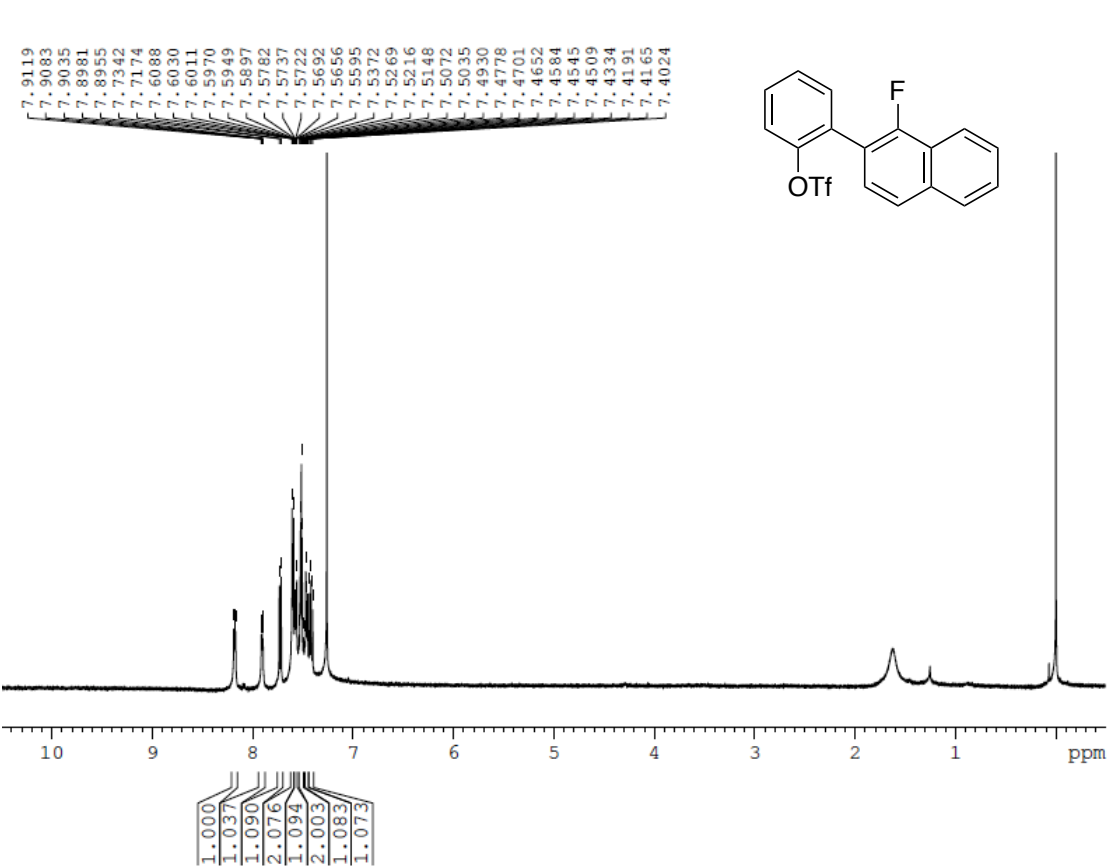

NAME sn-150831-pc OTf  
EXPNO 1  
PROCNO 1  
Date\_ 20150831  
Time 15.20  
INSTRUM av500  
PROBHD 5 mm PUNYF Swi  
PULPROG zg30  
TD 65536  
SOLVENT CDCl<sub>3</sub>  
NS 8  
DS 2  
SWH 7507.507 Hz  
FIDRES 0.114555 Hz  
AQ 4.3648143 sec  
RG 362  
DW 66.600 usec  
DE 6.00 usec  
TE 295.6 K  
D1 1.00000000 sec  
D11 1  
D10

CHANNEL f1  
NUC1 <sup>1</sup>H  
P1 9.80 usec  
PL1 -2.00 dB  
SFO1 500.1332508 MHz  
SI 32768  
SF 500.1300125 MHz  
WDW EM  
SSB 0  
LB 0.10 Hz  
GB 0  
PC 10.00

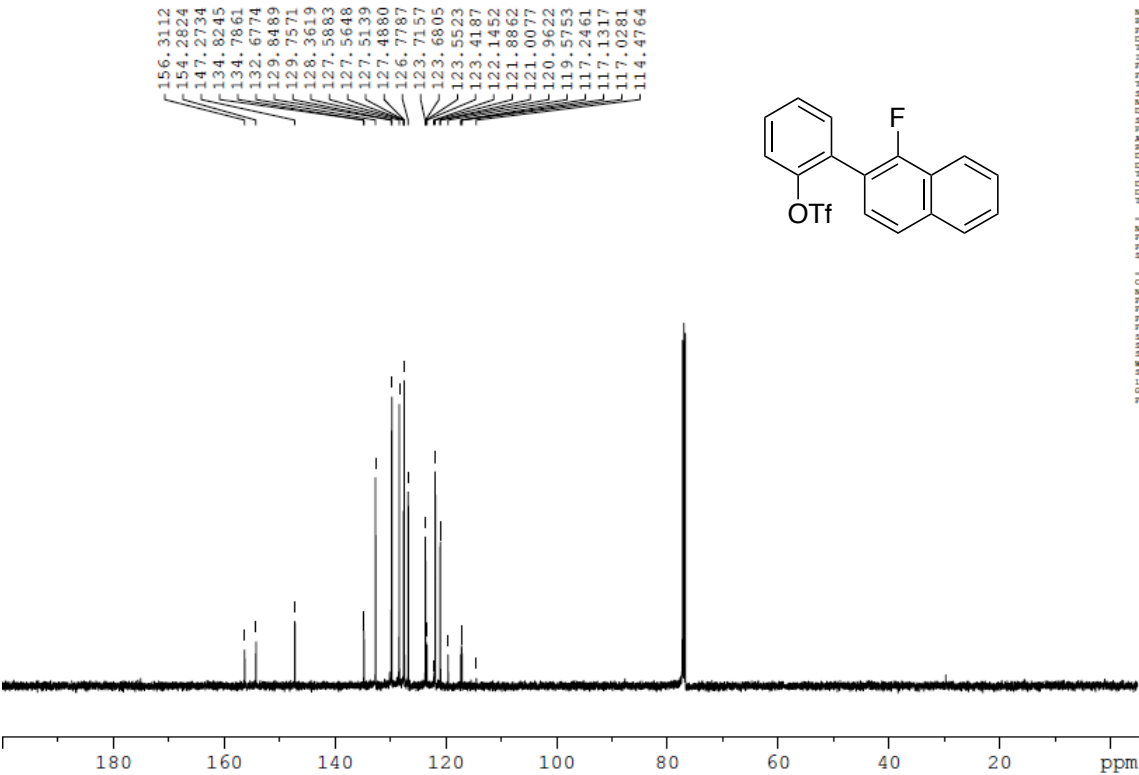

NAME sn-150831-pc OTF  
EXPNO 1  
PROCNO 1  
Date\_ 20150831  
Time 15.31  
INSTRUM av500  
PROBHD 5 mm PUNYF Swi  
PULPROG zgpg30  
TD 65536  
SOLVENT CDCl<sub>3</sub>  
NS 8  
DS 2  
SWH 30581.039 Hz  
FIDRES 0.466630 Hz  
AQ 1.0715799 sec  
RG 18392.4  
DW 16.350 usec  
DE 20.00 usec  
TE 295.7 K  
D1 1.00000000 sec  
D11 0.03000000 sec  
D10 1

CHANNEL f1  
NUC1 <sup>13</sup>C  
P1 7.10 usec  
PL1 -1.00 dB  
SFO1 125.7718239 MHz

CHANNEL f2  
NAME wait16  
NUC2 <sup>1</sup>H  
PCPD2 80.00 usec  
PL2 -2.00 dB  
PL12 16.00 dB  
PL13 16.00 dB  
SFO2 500.1320005 MHz  
SI 32768  
SF 125.7577968 MHz  
WDW EM  
SSB 0  
LB 1.00 Hz  
GB 0  
PC 1.40

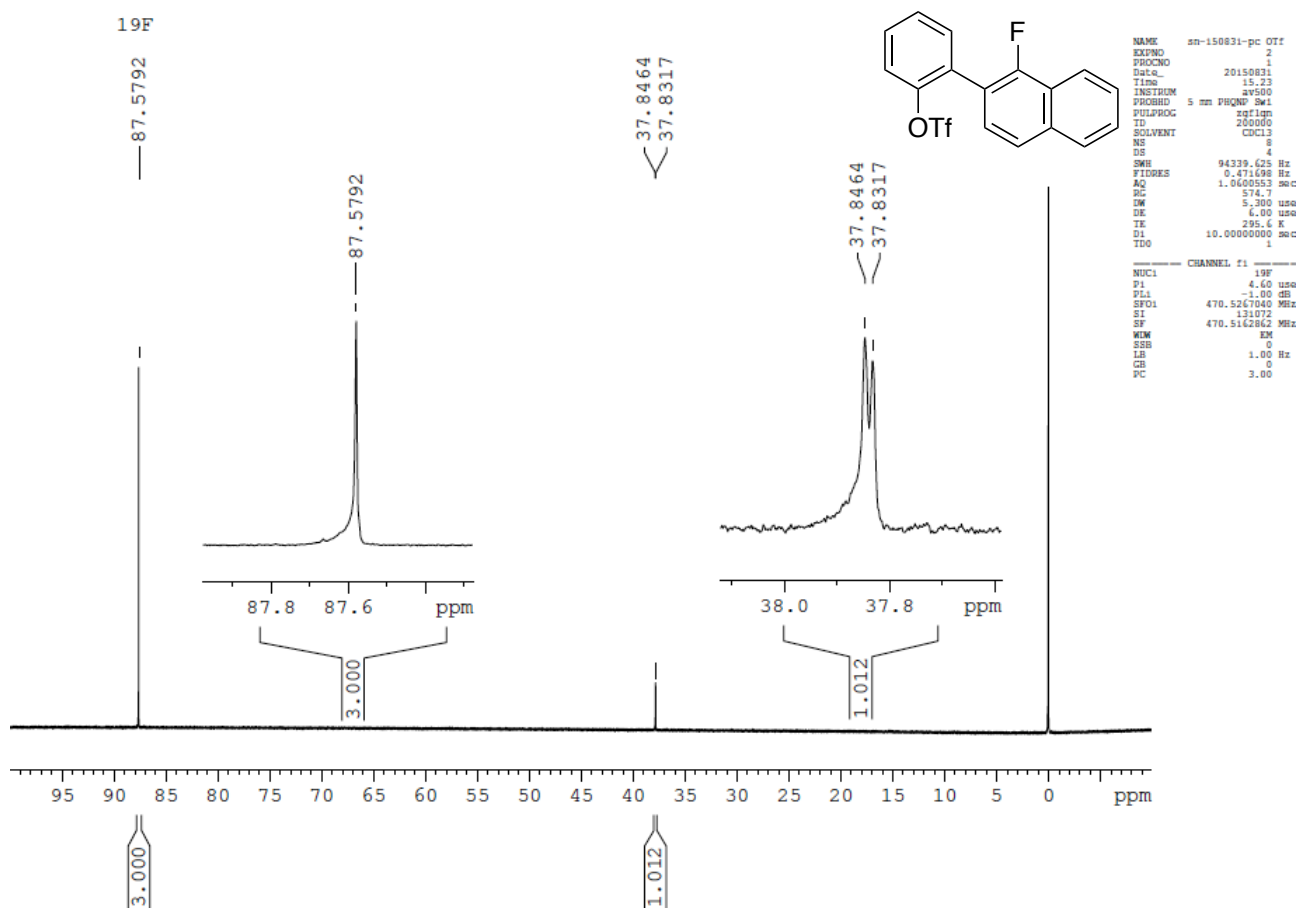

# 1-Fluoro-2-(4'-methylbiphenyl-2-yl)naphthalene (1b)

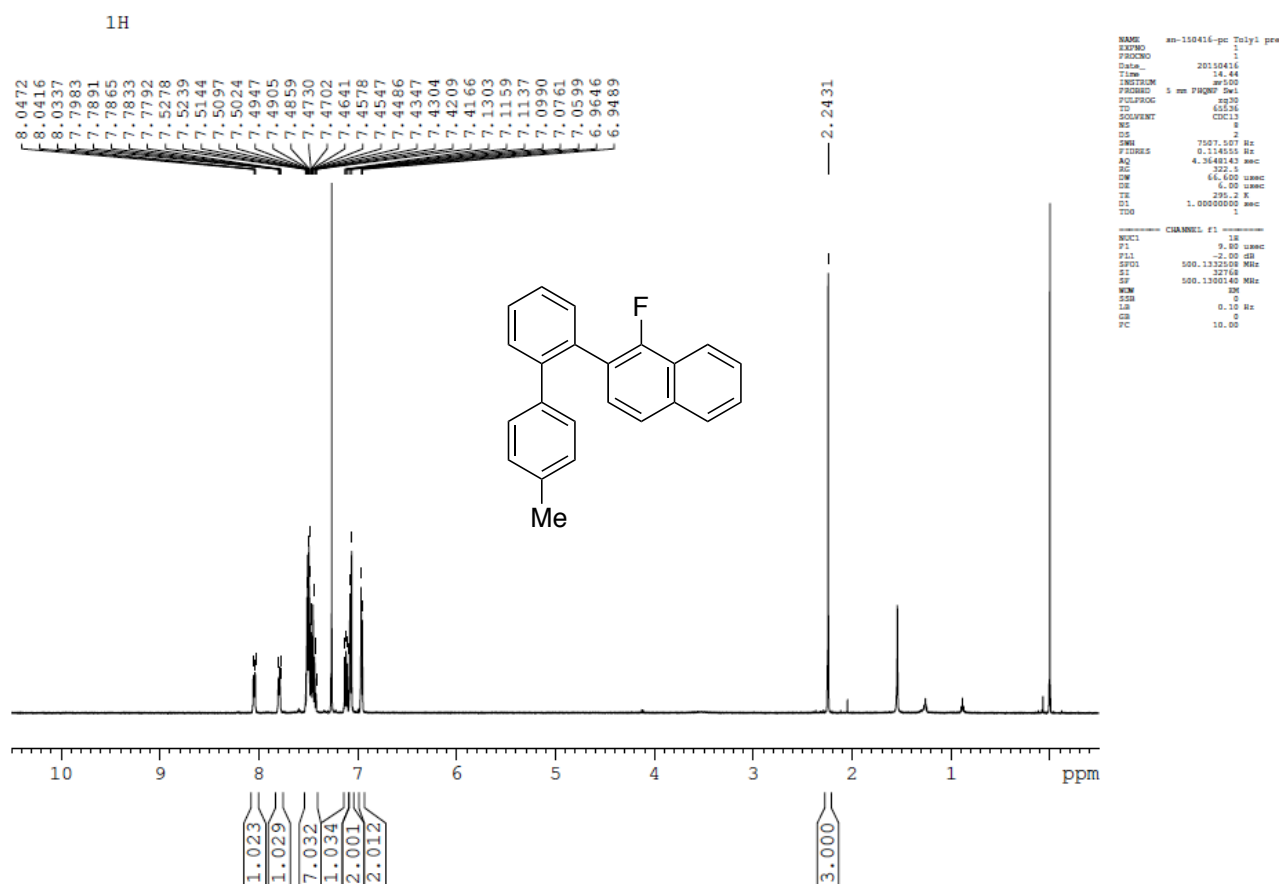

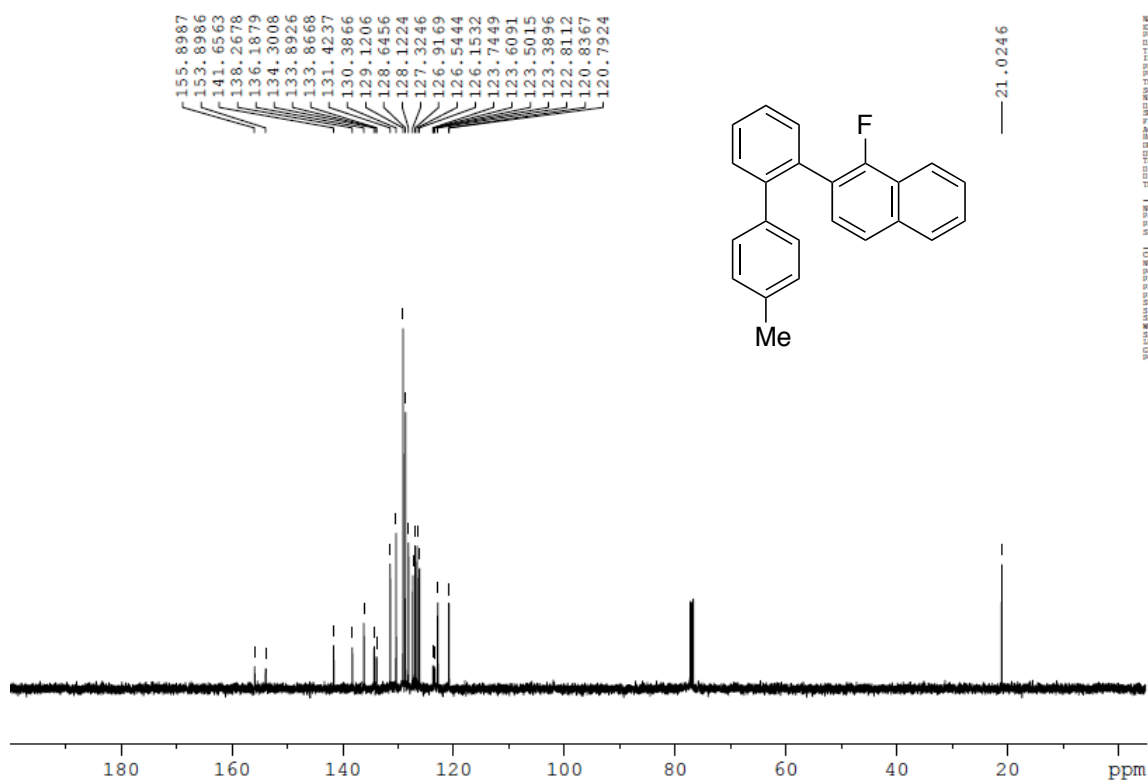

```

NAME an-150416-pc Tolyi pec
EXPNO 2
PROCNO 1
Date_ 20150416
Time 14.52
INSTRUM spect
PROBHD 5 mm PFGHD 51
PULPROG zgpg30
TD 65536
SOLVENT CDCl3
NS 1
DS 4
SWH 30581.839 Hz
FIDRES 0.464439 Hz
AQ 1.0715194 sec
RG 10292.4
SQ 14.100 uMHC
DE 23.00 uMHC
TE 296.2 K
D1 1.00000000 sec
D11 0.03000000 sec
TSD 1

===== CHANNEL F1 =====
NUC1 13C
P1 7.10 uMHC
PL1 1.00 dB
SFO1 125.7718239 MHz

===== CHANNEL F2 =====
NAME2 waltz16
NUC2 1H
P2 80.00 uMHC
PL2 -2.00 dB
PL12 16.00 dB
PL13 16.00 dB
SFO2 500.1350901 MHz
SFO3 500.1350901 MHz
SF 125.7718239 MHz
WCM 1M
SGB 0
LB 1.00 Hz
GB 0
PC 1.40

```

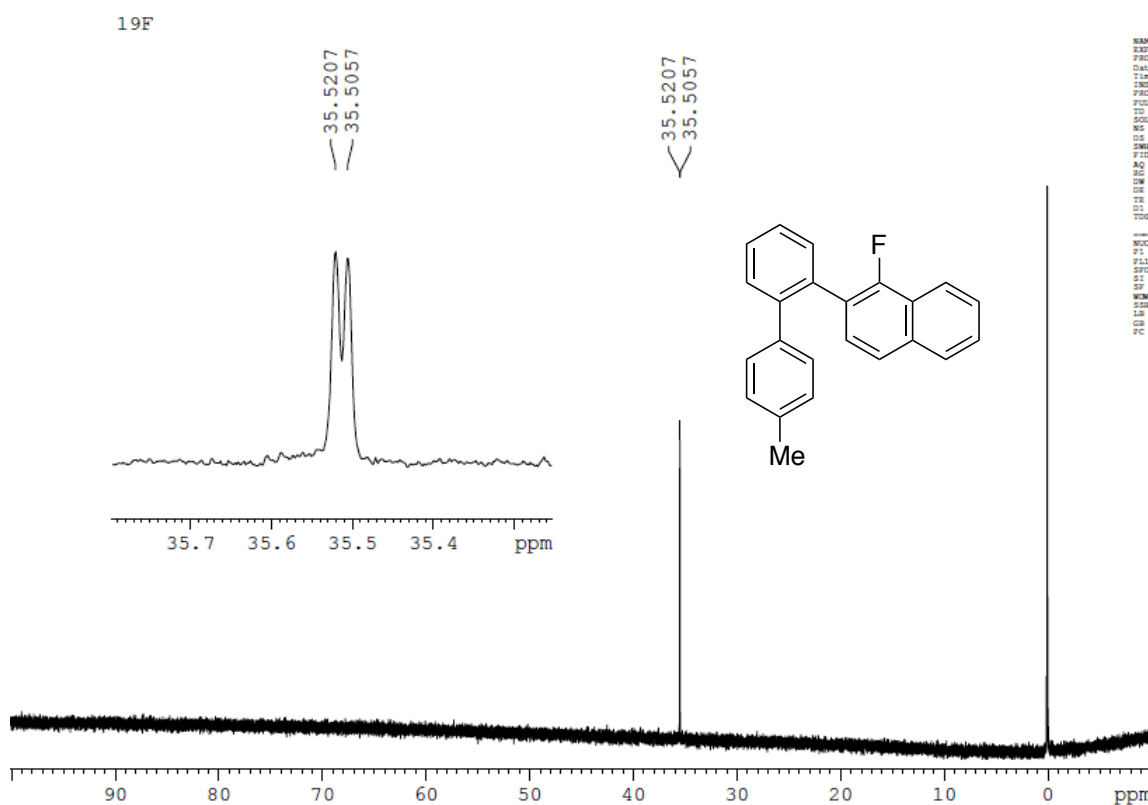

```

NAME an-150416-pc Tolyi pec
EXPNO 2
PROCNO 1
Date_ 20150416
Time 14.47
INSTRUM spect
PROBHD 5 mm PFGHD 51
PULPROG zgpg30
TD 260000
SOLVENT CDCl3
NS 1
DS 4
SWH 94339.625 Hz
FIDRES 0.471639 Hz
AQ 1.0600553 sec
RG 374.7
SQ 5.300 uMHC
DE 6.00 uMHC
TE 296.2 K
D1 10.00000000 sec
D11 0.03000000 sec
TSD 1

===== CHANNEL F1 =====
NUC1 19F
P1 4.00 uMHC
PL1 1.00 dB
SFO1 470.5267040 MHz
D1 131072
SF 470.5162736 MHz
WCM 1M
SGB 0
LB 1.00 Hz
GB 0
PC 3.00

```



# 2-(4'-Butylbiphenyl-2-yl)-1-fluoronaphthalene (1c)

<sup>1</sup>H

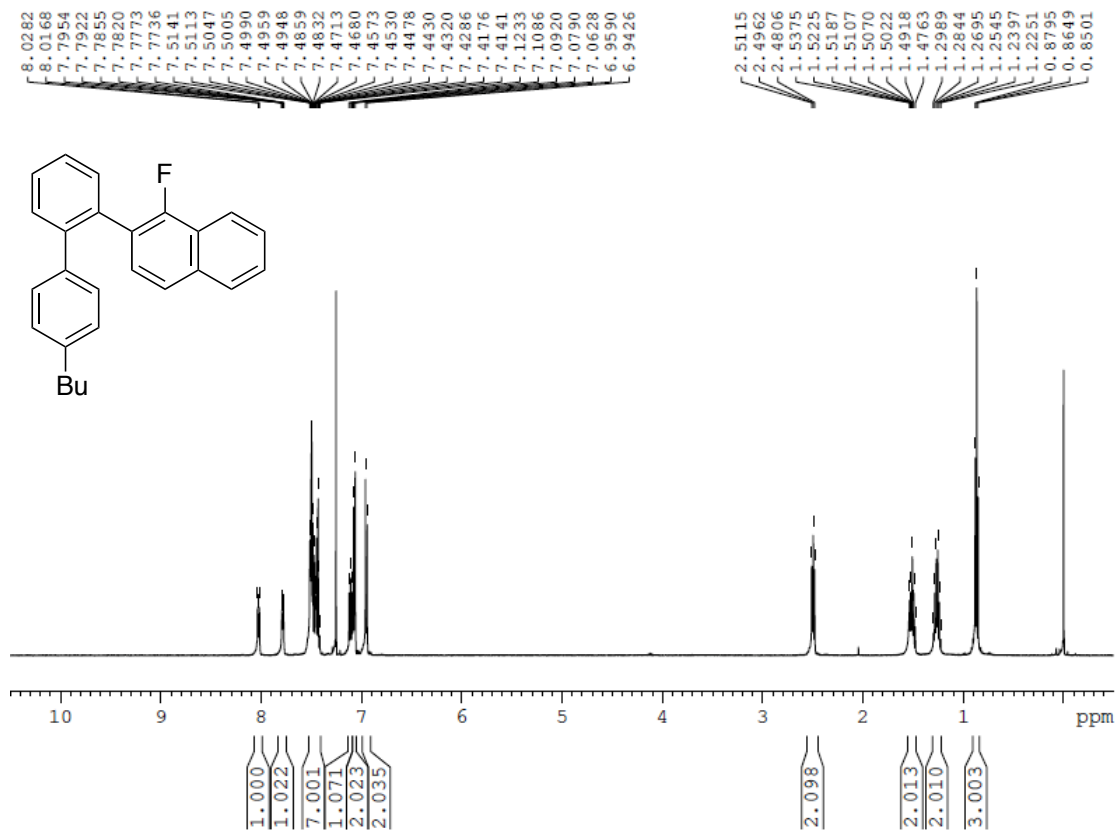

NAME an-160418-pc Bu pro  
EXPNO 1  
PROCNO 1  
Date\_ 20160418  
Time 14.24  
INSTRUM spect  
PROBHD 5 mm FPGM Swi  
PULPROG zgpg30  
TD 65536  
SOLVENT CDCl3  
NS 2  
DS 2  
SWH 7507.507 Hz  
FIDRES 0.114555 Hz  
AQ 4.3648143 sec  
RG 181  
CW 66.600 usec  
DE 6.00 usec  
TE 295.4 K  
D1 1.00000000 sec  
TD0 1

CHANNEL F1  
NUC1 1H  
P1 9.80 usec  
PL1 -2.00 dB  
SFO1 500.1320508 MHz  
SI 32768  
SF 500.13205175 MHz  
WDW EM  
SSB 0  
LB 0.10 Hz  
GB 0  
PC 10.00

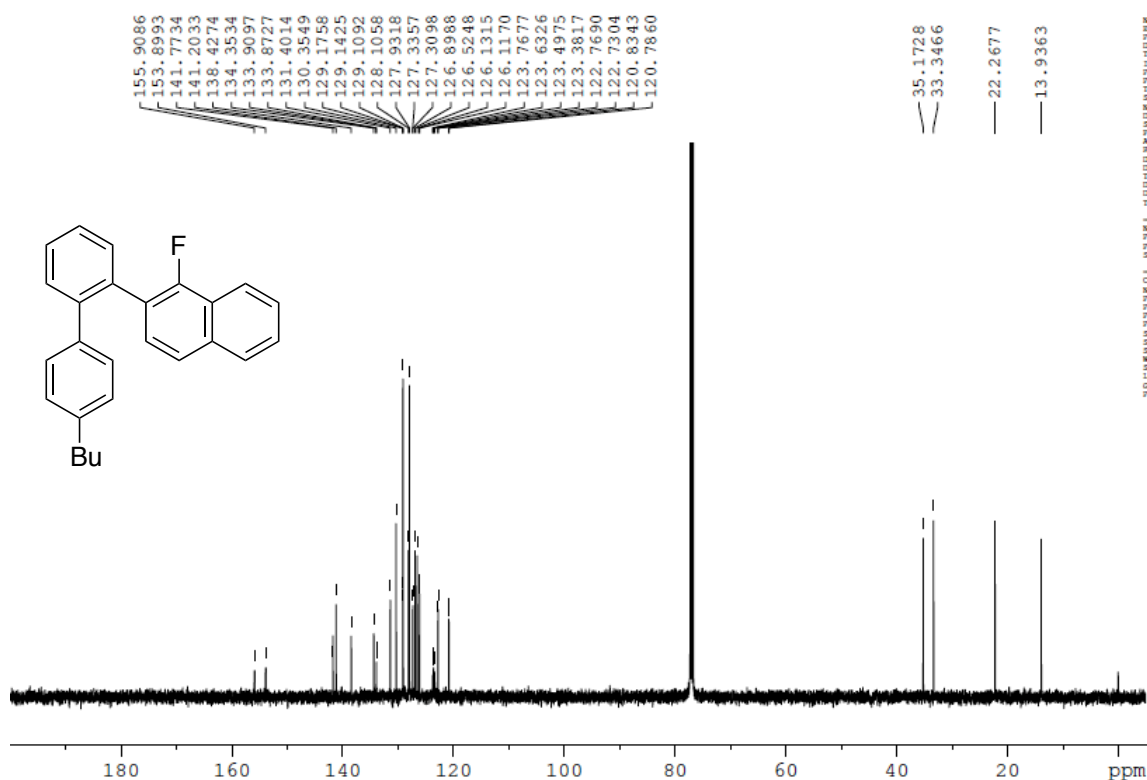

NAME an-160418-pc Bu pro  
EXPNO 1  
PROCNO 1  
Date\_ 20160418  
Time 14.24  
INSTRUM spect  
PROBHD 5 mm FPGM Swi  
PULPROG zgpg30  
TD 65536  
SOLVENT CDCl3  
NS 2  
DS 2  
SWH 30581.039 Hz  
FIDRES 0.466630 Hz  
AQ 1.071379 sec  
RG 18390.4  
CW 16.350 usec  
DE 20.00 usec  
TE 296.7 K  
D1 1.00000000 sec  
D11 0.03000000 sec  
TD0 1

CHANNEL F1  
NUC1 13C  
P1 7.10 usec  
PL1 -1.00 dB  
SFO1 125.7713239 MHz

CHANNEL F2  
wait16  
NUC2 1H  
PCPD2 80.00 usec  
PL12 -2.00 dB  
PL13 16.00 dB  
SFO2 500.1320508 MHz  
SI 32768  
SF 125.7577924 MHz  
WDW EM  
SSB 0  
LB 1.00 Hz  
GB 0  
PC 1.40

<sup>19</sup>F

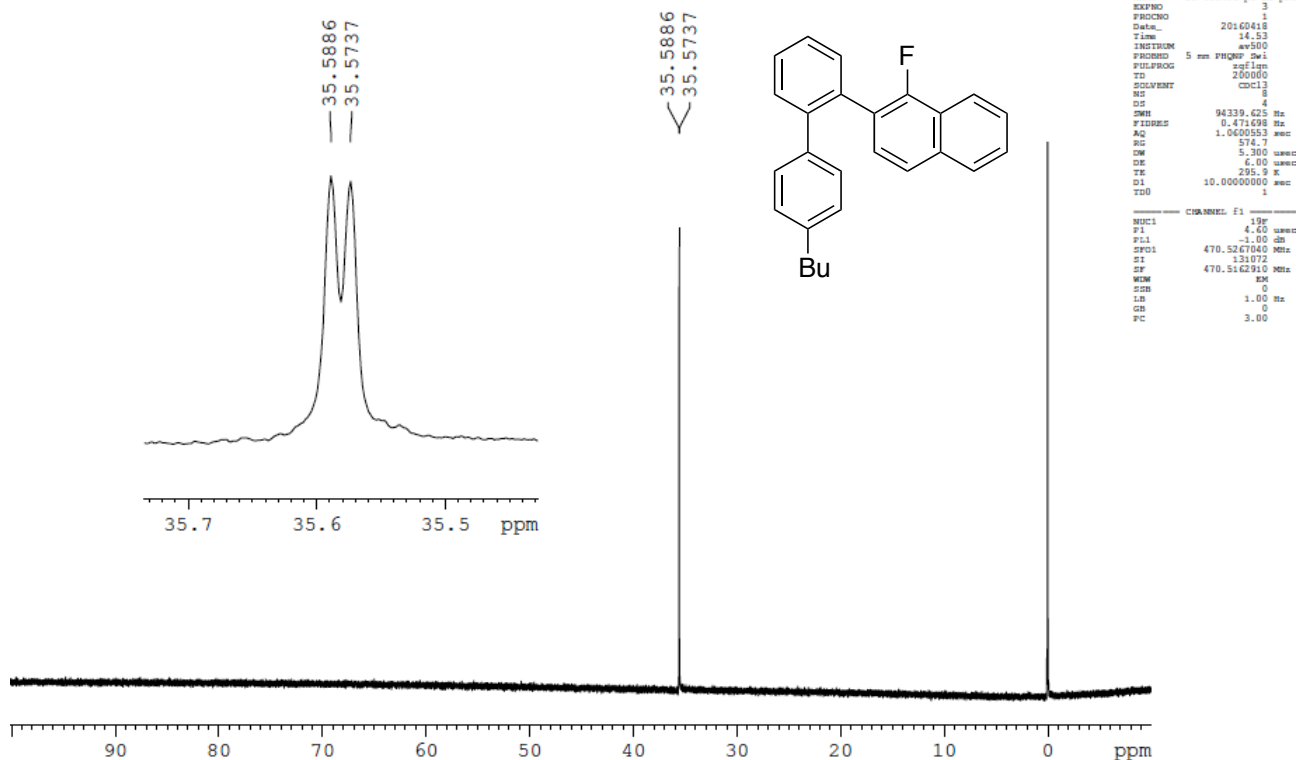

# 1-Fluoro-2-(4'-fluorobiphenyl-2-yl)naphthalene (1d)

<sup>1</sup>H

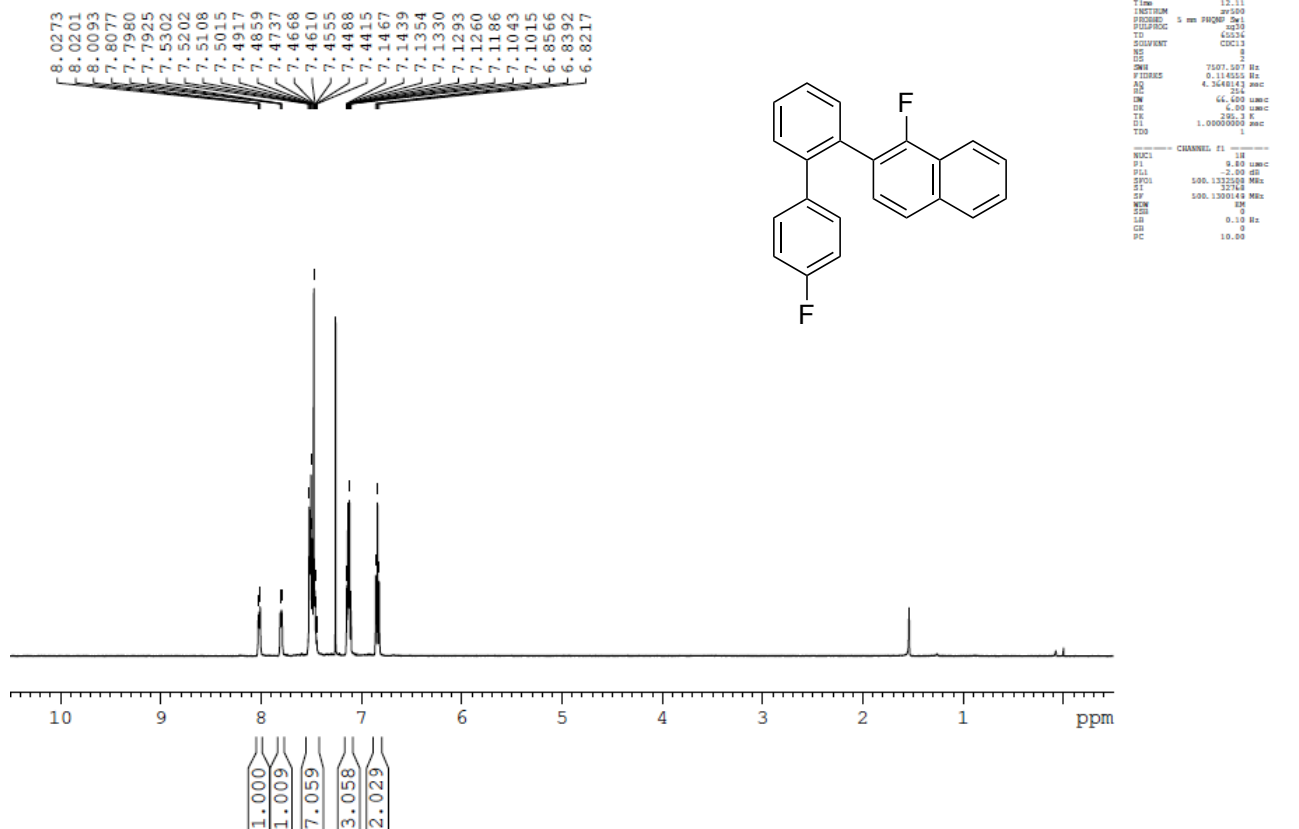

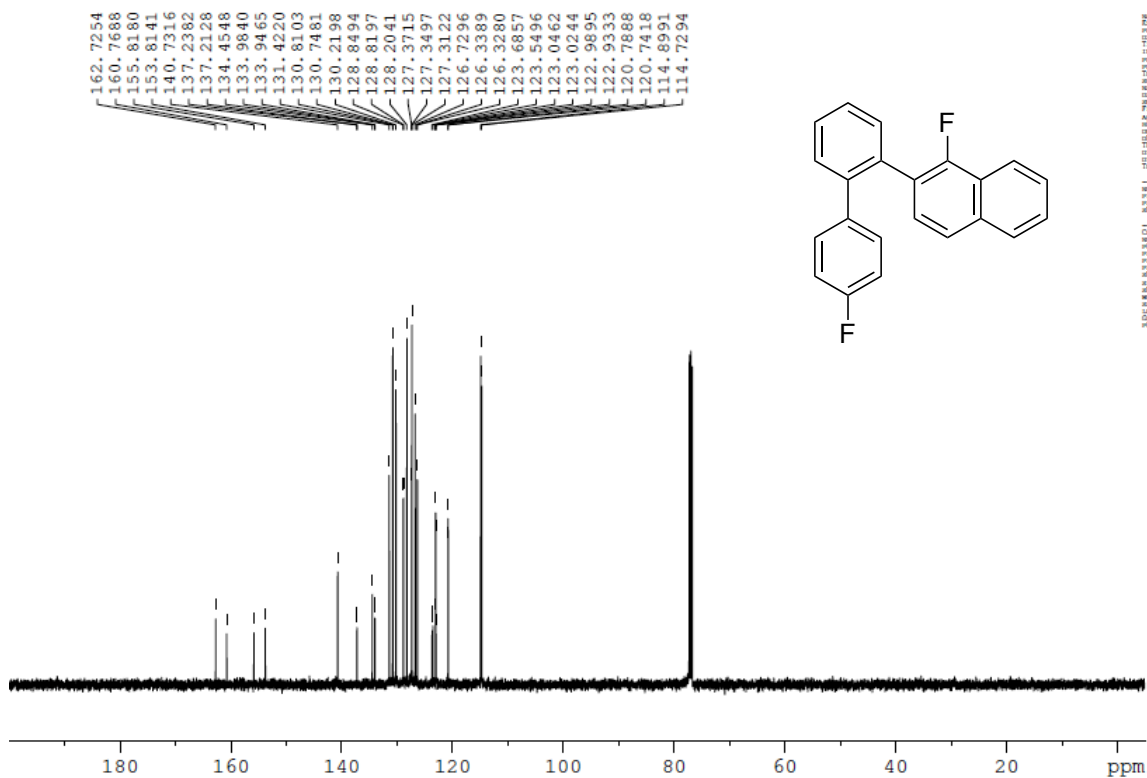

```

NAME  an-10430-pc F proc gamma
EXPNO  2
PROCNO  1
Date_  2010430
Time  12.25
INSTRUM  spect
PULPROG  zgpg30
TD  65536
SOLVENT  CDCl3
NS  8
DS  4
SWH  94338.625 Hz
FIDRES  0.471468 Hz
AQ  1.0605513 sec
RG  574
DE  5.350 uMVC
TE  300.2 K
D1  10.00000000 sec
D11  0.00000000 sec
===== CHANNEL f1 =====
NUC1  13C
P1  1.00 uMVC
PL1  0.00 dB
SFO1  470.3200000 MHz
D1  12.00000000 sec
===== CHANNEL f2 =====
NUC2  1H
PCPD2  88.00 uMVC
PL2  0.00 dB
SFO2  400.1420000 MHz
===== CHANNEL f3 =====
NUC3  1H
PCPD3  125.7677993 MHz
PL3  0.00 dB
SFO3  400.1420000 MHz
===== CHANNEL f4 =====
NUC4  1H
PCPD4  125.7677993 MHz
PL4  0.00 dB
SFO4  400.1420000 MHz

```

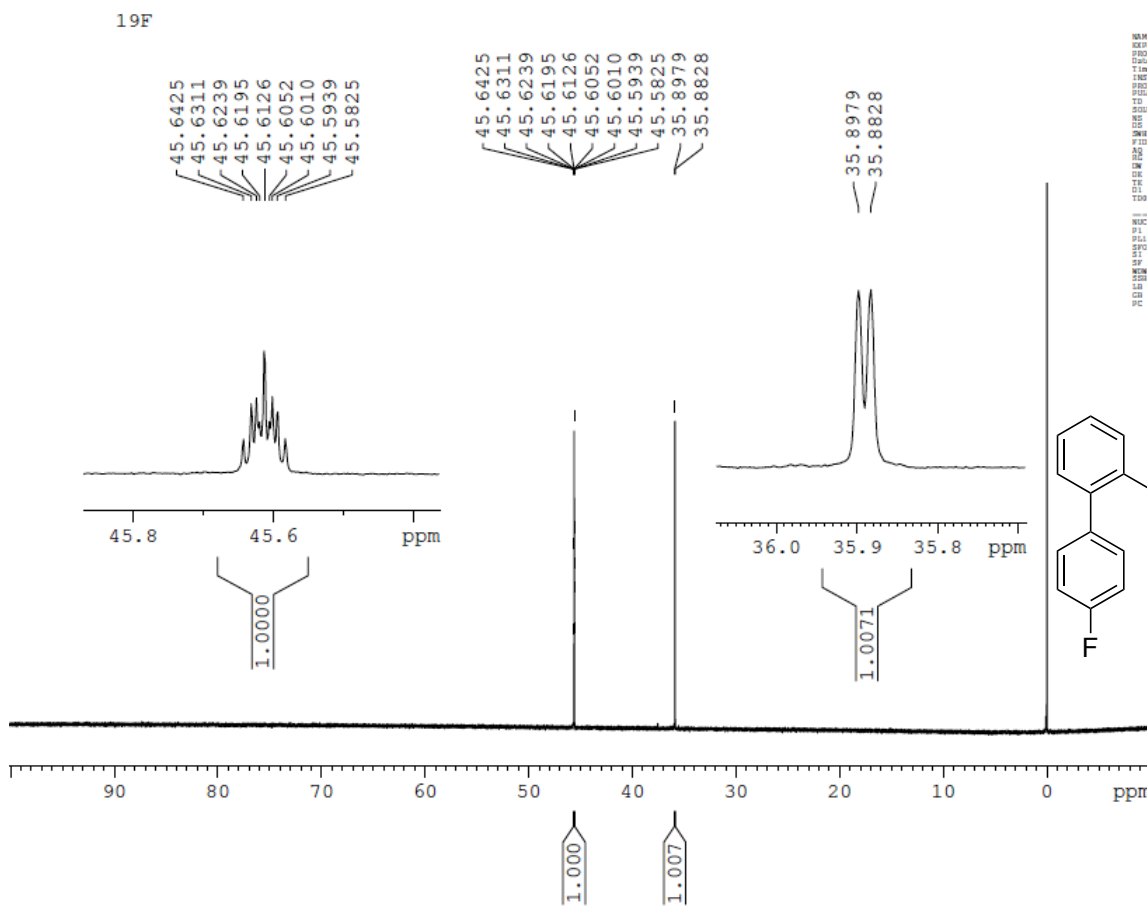

```

NAME  an-10430-pc F proc gamma
EXPNO  2
PROCNO  1
Date_  2010430
Time  12.25
INSTRUM  spect
PULPROG  zgpg30
TD  65536
SOLVENT  CDCl3
NS  8
DS  4
SWH  94338.625 Hz
FIDRES  0.471468 Hz
AQ  1.0605513 sec
RG  574
DE  5.350 uMVC
TE  300.2 K
D1  10.00000000 sec
D11  0.00000000 sec
===== CHANNEL f1 =====
NUC1  19F
P1  1.00 uMVC
PL1  0.00 dB
SFO1  470.3200000 MHz
D1  12.00000000 sec
===== CHANNEL f2 =====
NUC2  1H
PCPD2  88.00 uMVC
PL2  0.00 dB
SFO2  400.1420000 MHz
===== CHANNEL f3 =====
NUC3  1H
PCPD3  125.7677993 MHz
PL3  0.00 dB
SFO3  400.1420000 MHz
===== CHANNEL f4 =====
NUC4  1H
PCPD4  125.7677993 MHz
PL4  0.00 dB
SFO4  400.1420000 MHz

```

2-(4'-Chlorobiphenyl-2-yl)-1-fluoronaphthalene (1e)

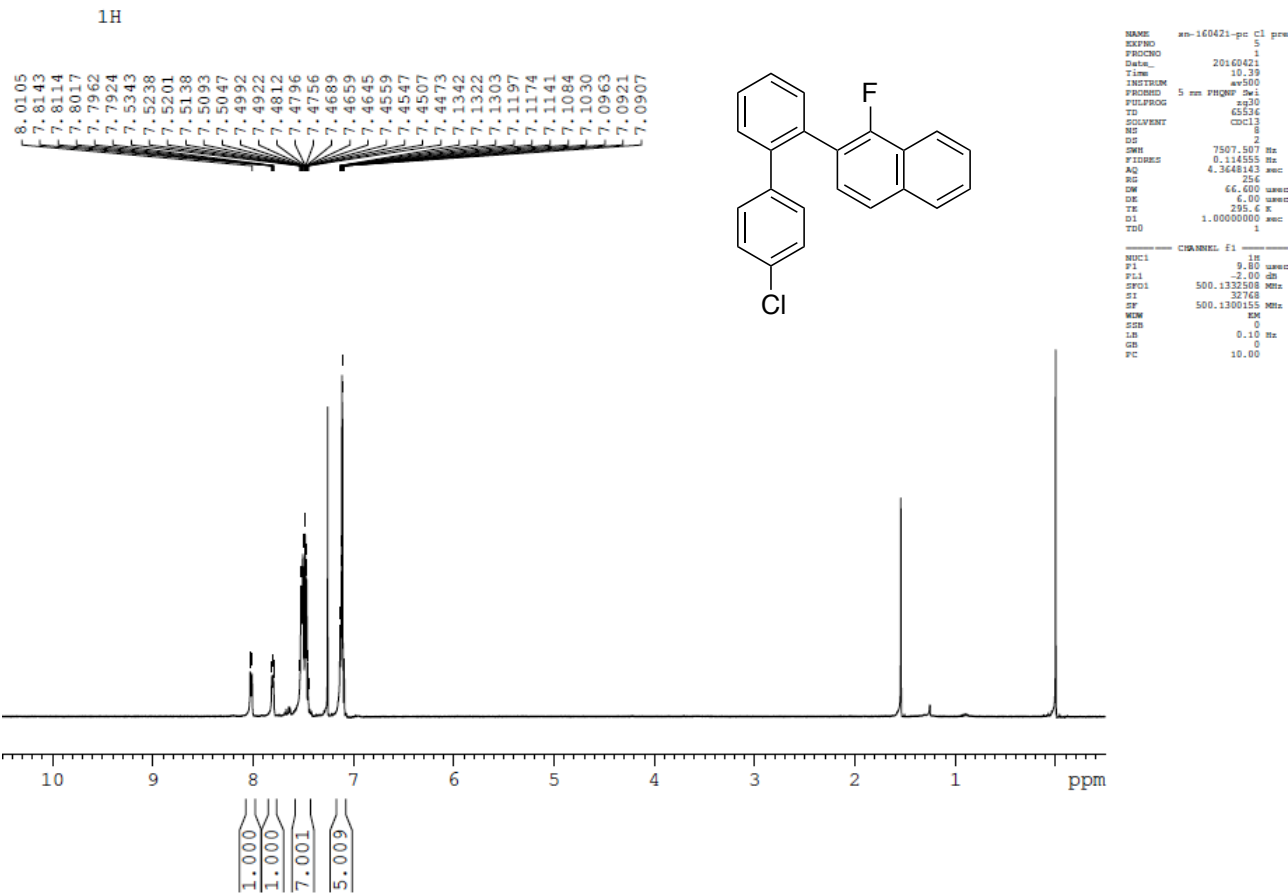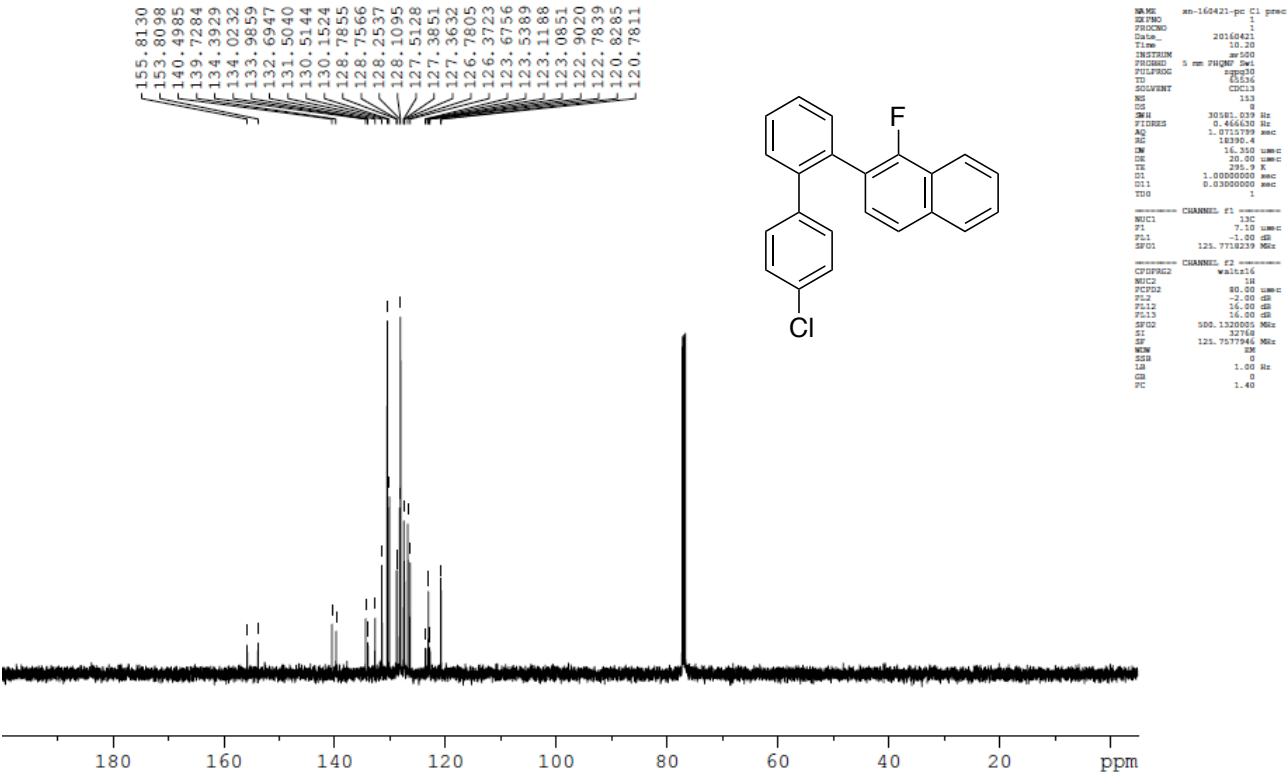

<sup>19</sup>F

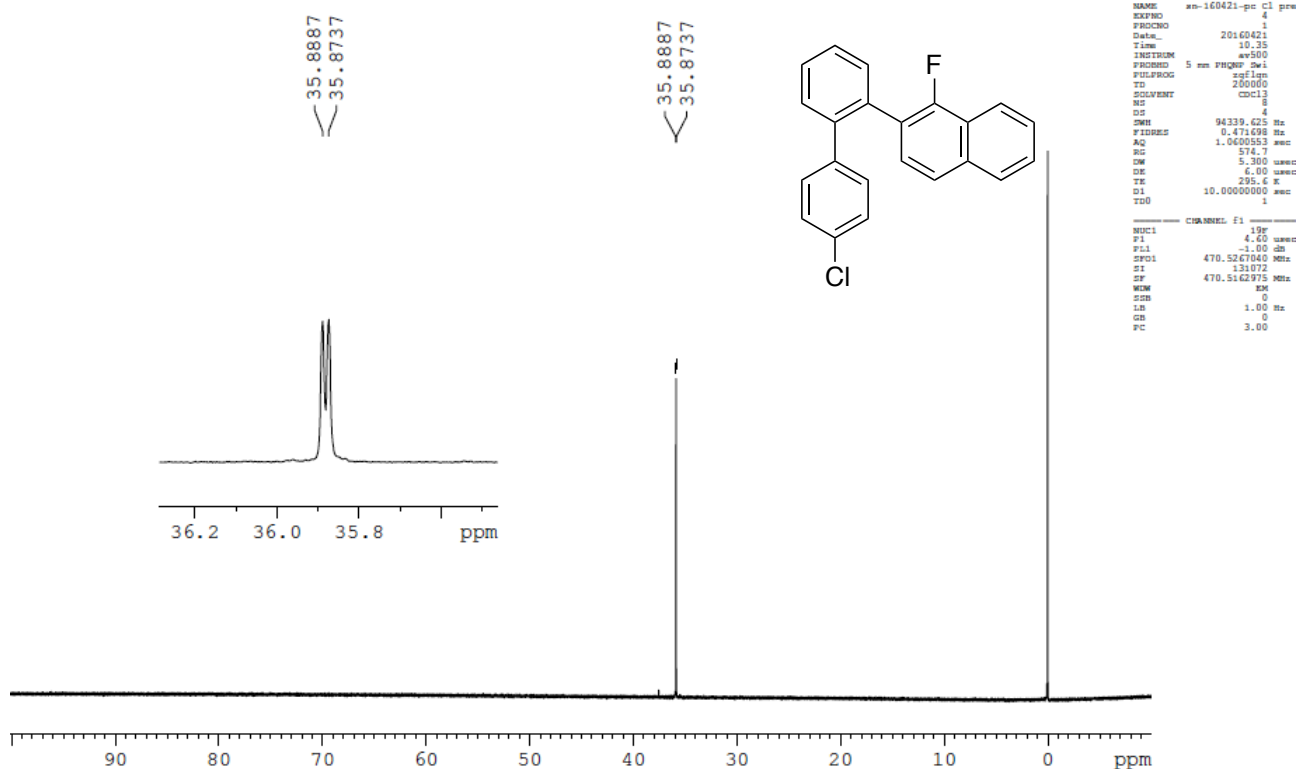

# 1-Fluoro-2-(1,1':4',1''-terphenyl-2-yl)naphthalene (1f)

<sup>1</sup>H

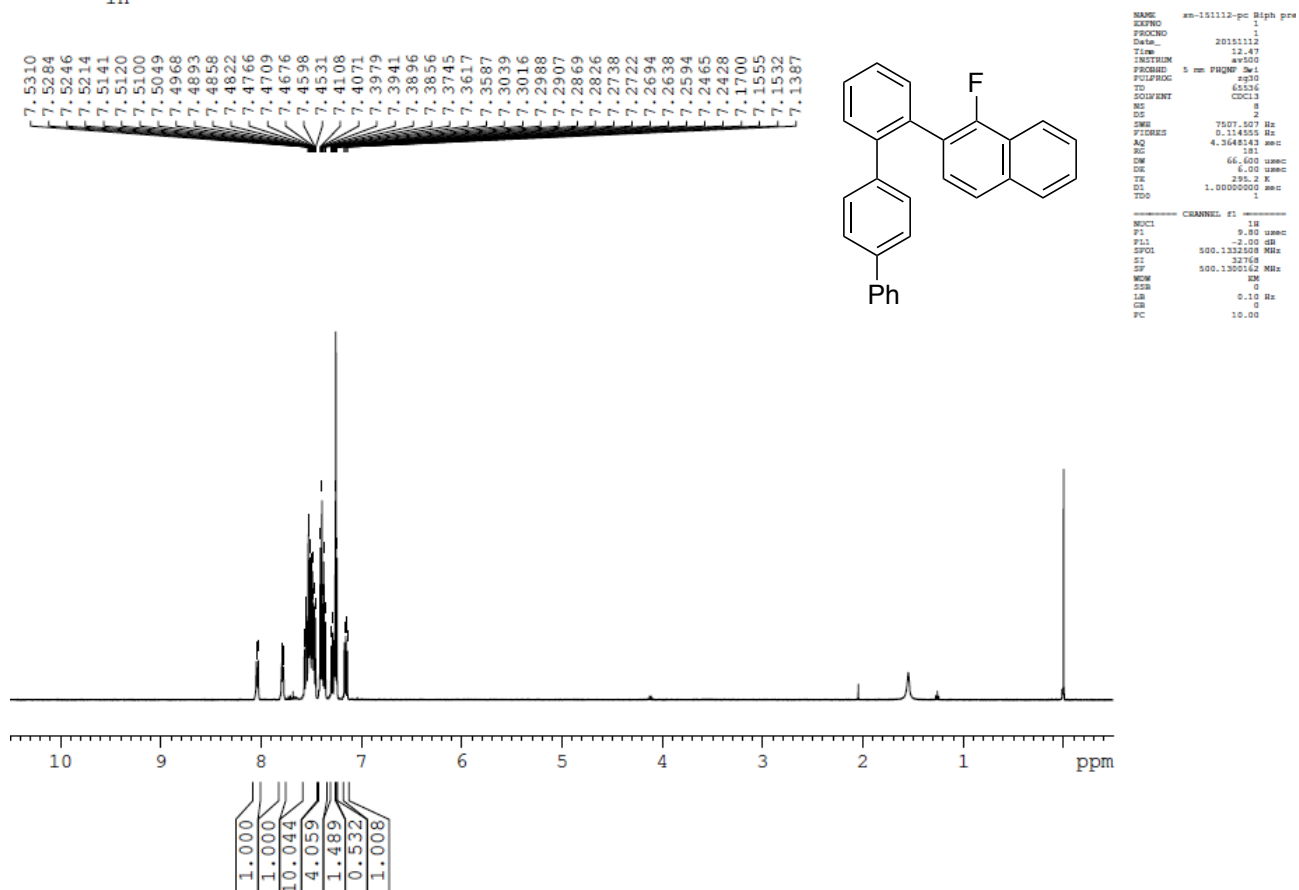

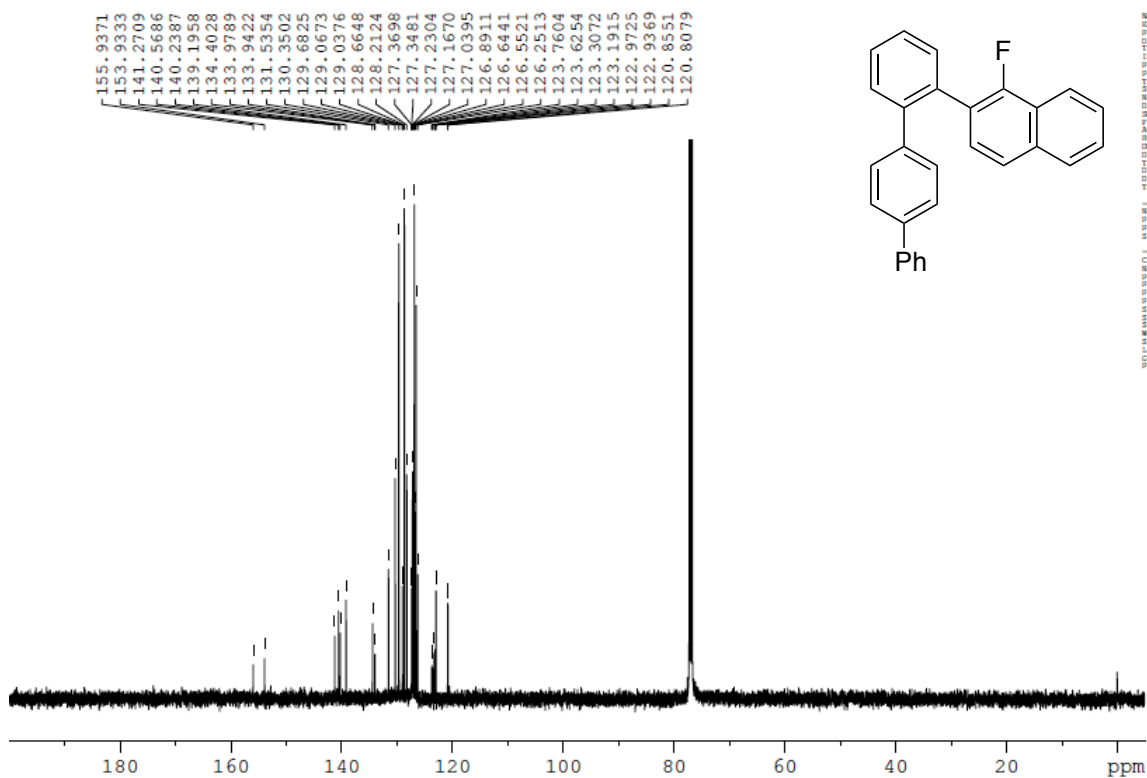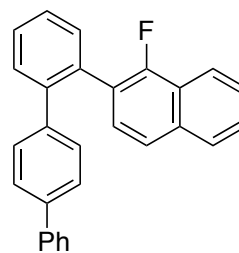

```

NAME      am-151112-pc High pres
EXPNO     2
PROCNO    1
Date_     20151112
Time      12.14
INSTRUM   av600
PROBHD    5 mm PFGNP 5w1
PULPROG   zgpg30
TD         65536
SOLVENT   CDCl3
NS         1800
DS         8
SWH        30681.019 Hz
FIDRES     0.464520 Hz
AQ         1.0711799 sec
RG         18370.4
DE         16.350 umsec
TE         295.2 K
D1         1.00000000 sec
D11        0.03000000 sec
TD0        1

===== CHANNEL f1 =====
NUC1       13C
P1         7.10 umsec
PL1        -1.00 dB
SFO1       125.7718219 MHz

===== CHANNEL f2 =====
CPDPRG2    waltz16
NUC2       1H
PCPD2      80.00 umsec
PL2        -2.00 dB
PL12       16.00 dB
PL13       16.00 dB
SFO2       500.1320000 MHz
P2         32.16 umsec
SF         125.7577211 MHz
RG         327.68
DSB        0
LB         1.00 Hz
GB         0
PC         1.40
  
```

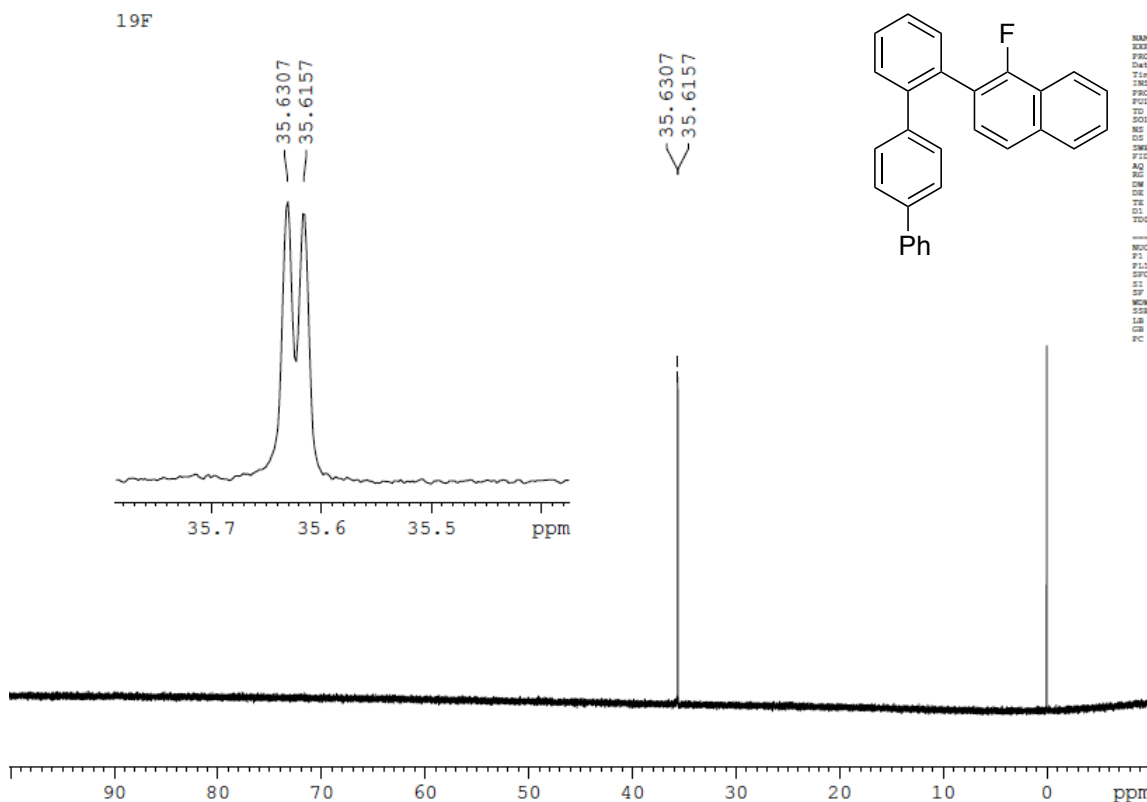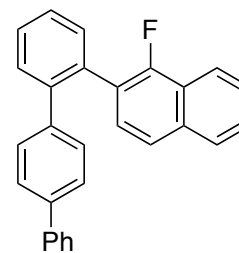

```

NAME      am-151112-pc High pres
EXPNO     2
PROCNO    1
Date_     20151112
Time      14.00
INSTRUM   av600
PROBHD    5 mm PFGNP 5w1
PULPROG   zgpg30
TD         260000
SOLVENT   CDCl3
NS         8
DS         8
SWH        94339.626 Hz
FIDRES     0.471698 Hz
AQ         1.0600552 sec
RG         574.7
DE         5.300 umsec
TE         295.2 K
D1         10.00000000 sec
D11        1
TD0        1

===== CHANNEL f1 =====
NUC1       19F
P1         4.60 umsec
PL1        -1.00 dB
SFO1       470.5615840 MHz
SI         131072
SF         470.5162938 MHz
RG         327.68
DSB        0
LB         1.00 Hz
GB         0
PC         3.00
  
```

# 2-Benzyl-6-fluorobenzaldehyde

<sup>1</sup>H

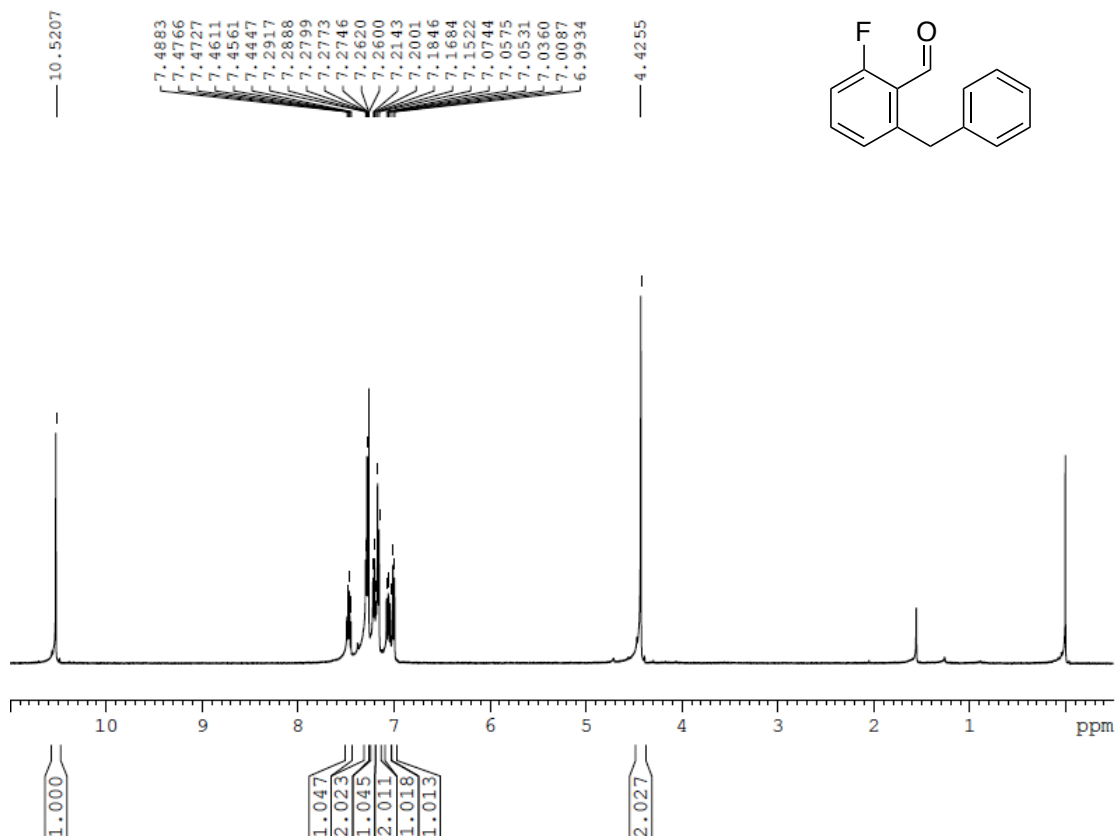

```

NAME      sn-160422-pc-BnFmF
EXPNO     1
PROCNO    1
Date_     20160422
Time      21.33
INSTRUM    AV500
PROBHD     5 mm PFGNP Swi
PULPROG    zg30
TD         65536
SOLVENT    CDCl3
NS         8
DS         2
SWH         7507.507 Hz
FIDRES     0.114555 Hz
AQ         4.3648143 sec
RG         181
DM         66.600 usec
DE         6.00 usec
TE         296.5 K
D1         1.00000000 sec
D11        1
D10        1

===== CHANNEL f1 =====
NUC1       1H
P1         9.80 usec
PL1        -2.00 dB
SFO1       500.1332508 MHz
SI         32768
SF         500.1300136 MHz
WDW         EM
SSB         0
LB         0.10 Hz
GB         0
PC         10.00
  
```

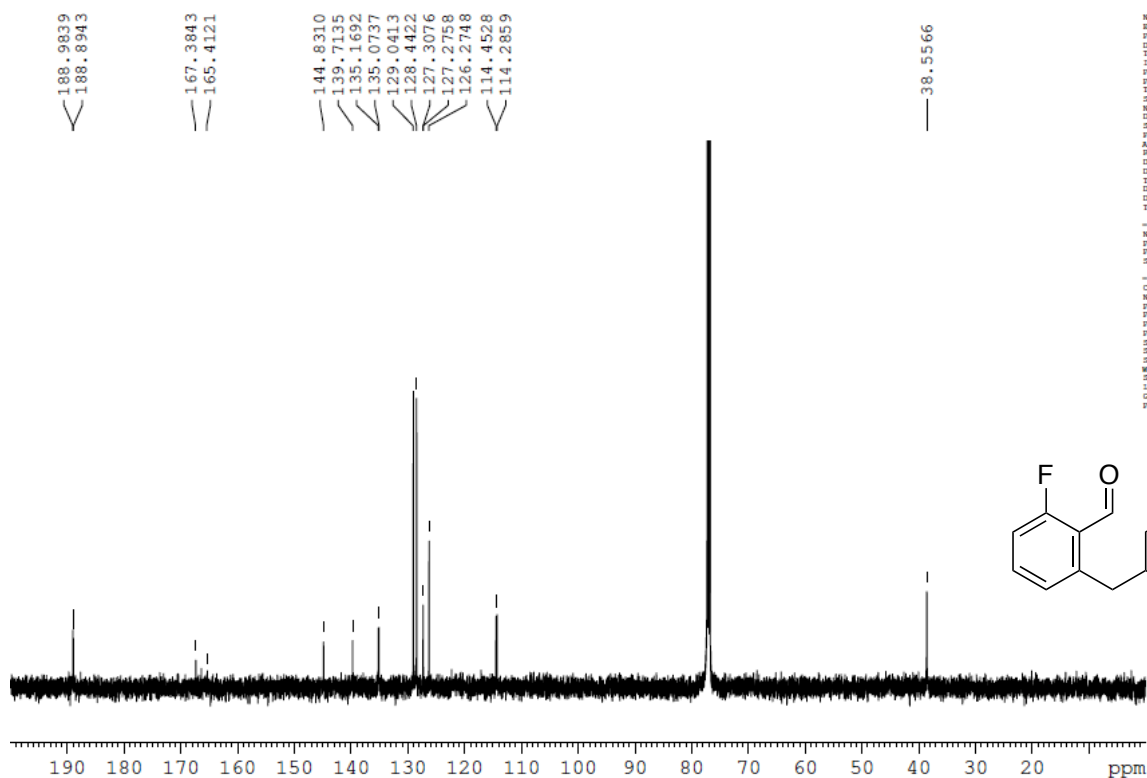

```

NAME      sn-160422-pc-BnFmF
EXPNO     2
PROCNO    1
Date_     20160422
Time      21.39
INSTRUM    AV500
PROBHD     5 mm PFGNP Swi
PULPROG    zgpg30
TD         65536
SOLVENT    CDCl3
NS         8
DS         8
SWH         30581.030 Hz
FIDRES     0.466630 Hz
AQ         1.0715799 sec
RG         18390.4
DM         16.350 usec
DE         20.00 usec
TE         296.5 K
D1         1.00000000 sec
D11        0.03000000 sec
D10        1

===== CHANNEL f1 =====
NUC1       13C
P1         7.10 usec
PL1        -1.00 dB
SFO1       125.7718239 MHz

===== CHANNEL f2 =====
CPDPRG2    waltz16
NUC2       1H
PCPD2      80.00 usec
PL2        -2.00 dB
PL12       16.00 dB
PL13       16.00 dB
SFO2       500.1320005 MHz
SI         32768
SF         125.7577921 MHz
WDW         EM
SSB         0
LB         1.00 Hz
GB         0
PC         1.40
  
```

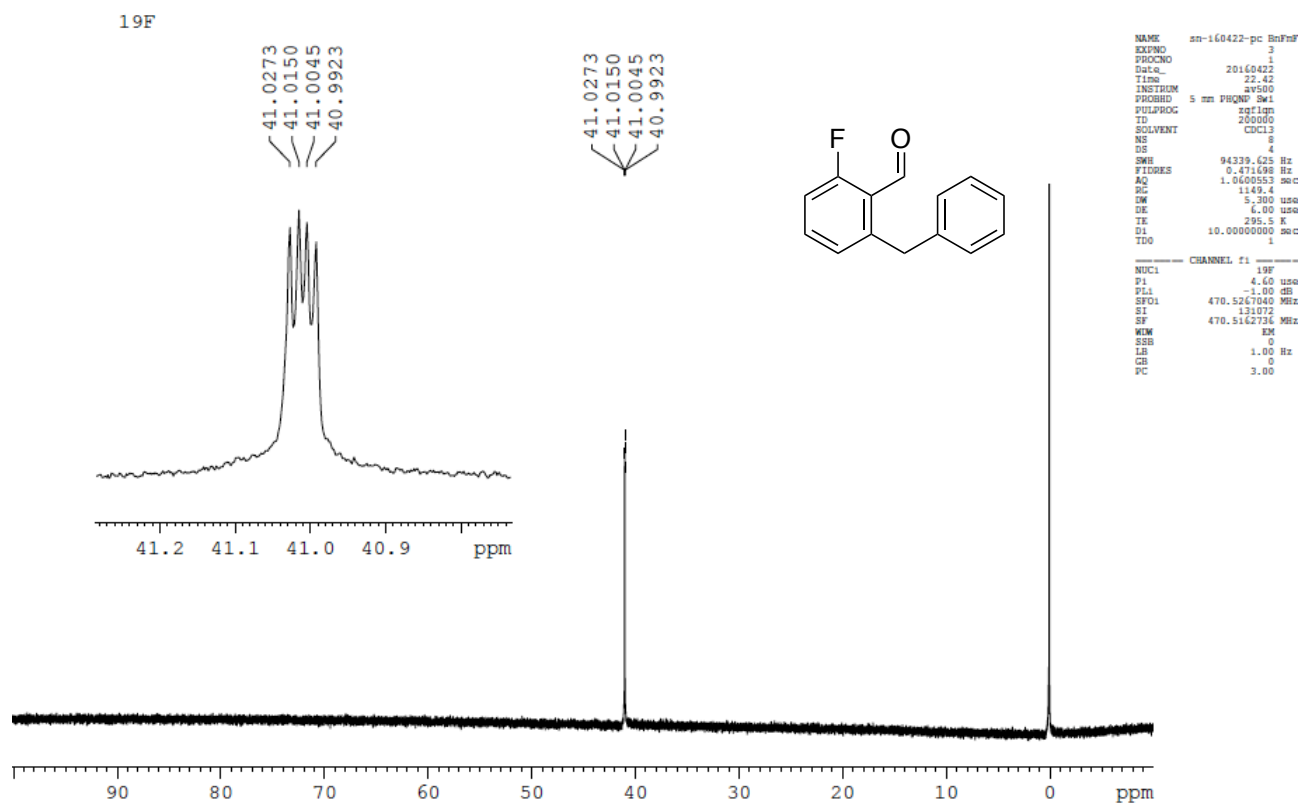

## 1-Fluoroanthracene

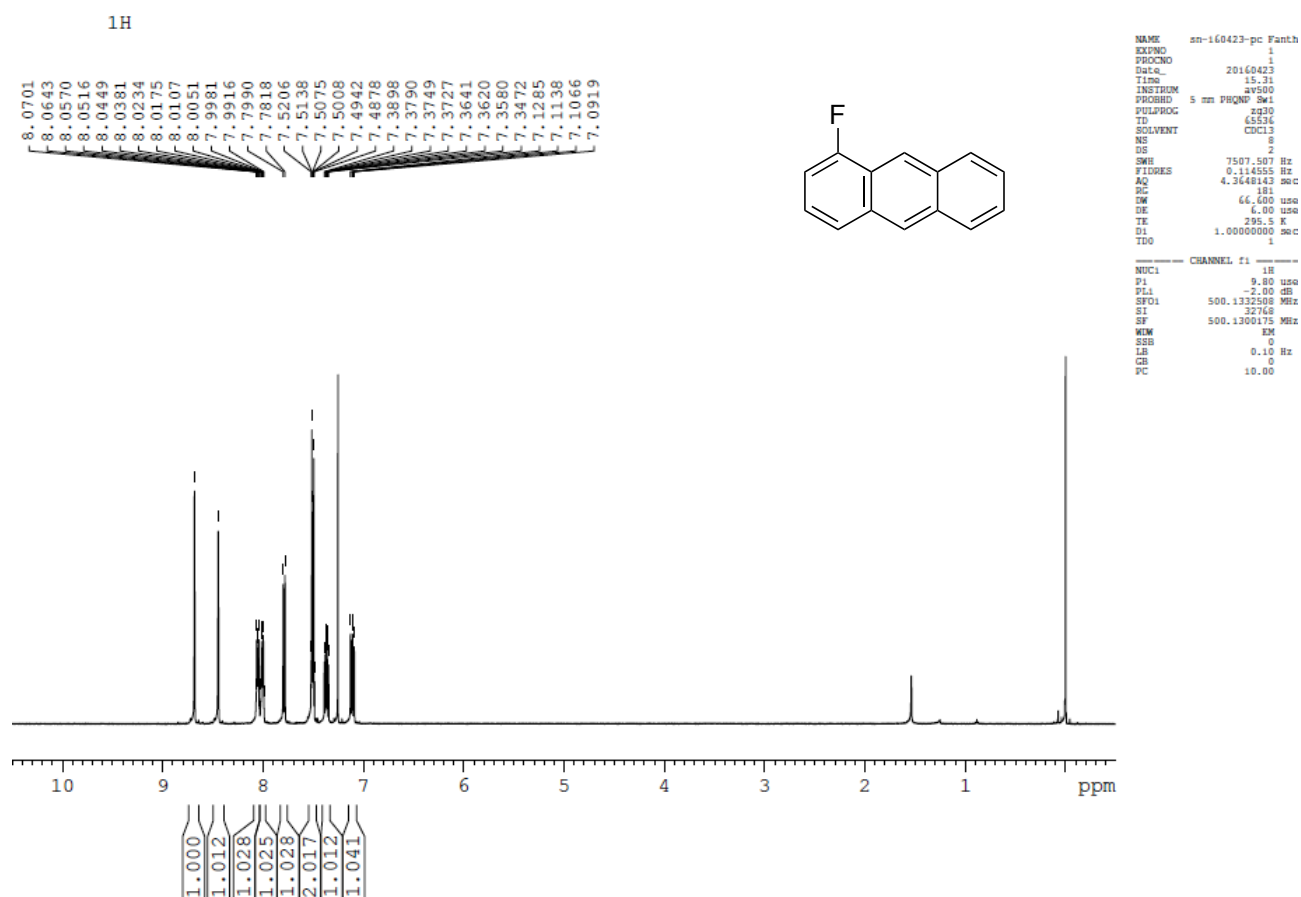



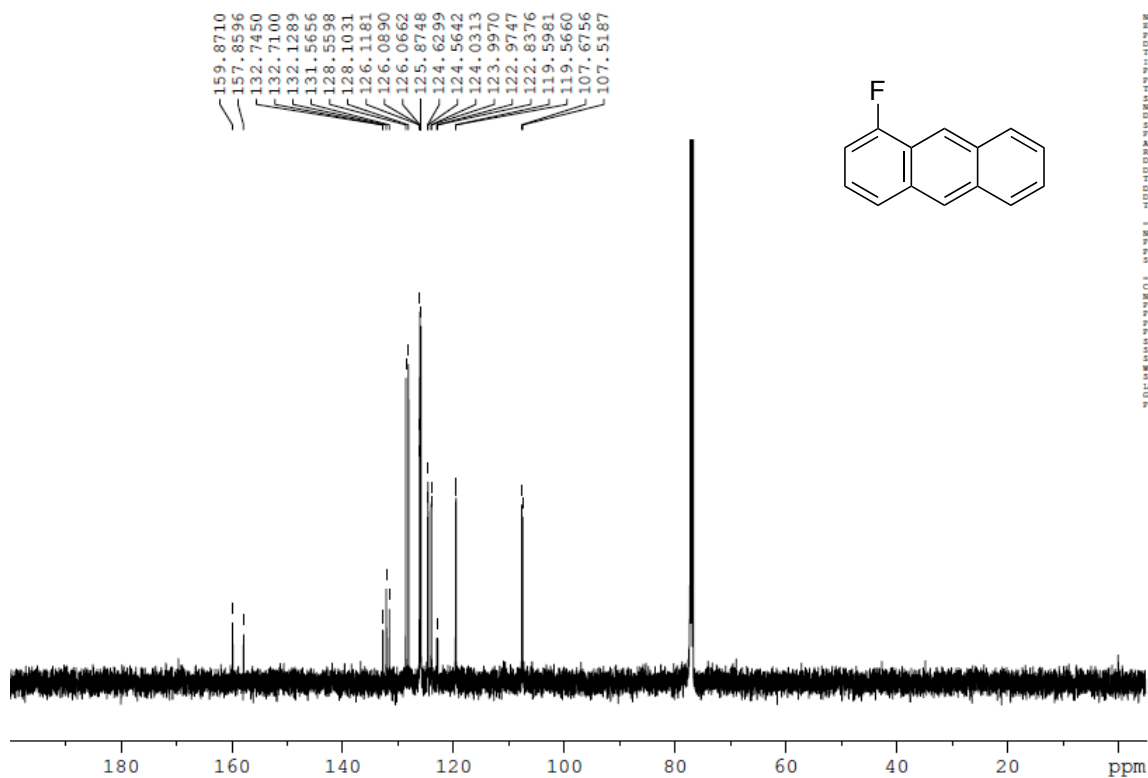

```

NAME      sn-160423-pc Fanth
EXPNO     1
PROCNO    1
Date_     20160423
Time      15.44
RG         18390.4
INSTRUM   spect
PROBHD    5 mm PNPQ 5w1
PULPROG   zgpg30
TD         65536
SOLVENT   CDCl3
NS         331
DS         8
SWH        30561.033 Hz
FIDRES     0.466430 Hz
AQ         1.0715799 sec
RG         16.350 usec
DE         20.00 usec
TE         296.5 K
D1         1.00000000 sec
D11        0.03000000 sec
TD0        1

===== CHANNEL f1 =====
NUC1       13C
P1         7.10 usec
PL1        -1.00 dB
SFO1       125.7718239 MHz

===== CHANNEL f2 =====
CPDPRG2   waltz16
NUC2       1H
PCPD2      80.00 usec
PL2        -2.00 dB
PL12       16.00 dB
PL13       16.00 dB
SFO2       500.1320005 MHz
SI         32768
SF         125.7577940 MHz
MCM        RM
SSB        0
LB         1.00 Hz
GB         0
PC         1.40

```

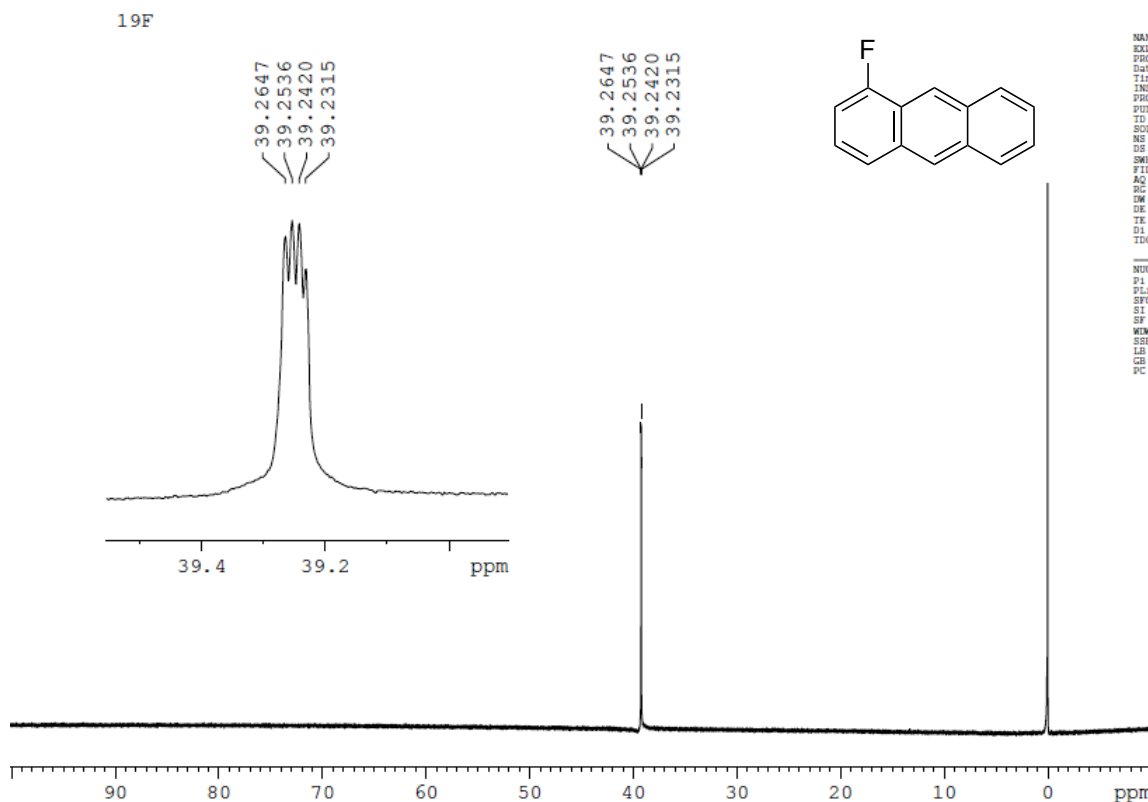

```

NAME      sn-160423-pc Fanth
EXPNO     5
PROCNO    1
Date_     20160423
Time      15.57
RG         18390.4
INSTRUM   spect
PROBHD    5 mm PNPQ 5w1
PULPROG   zgpg30
TD         260000
SOLVENT   CDCl3
NS         8
DS         4
SWH        94339.625 Hz
FIDRES     0.471698 Hz
AQ         1.0600553 sec
RG         574.7
DE         5.300 usec
TE         296.1 K
D1         10.00000000 sec
TD0        1

===== CHANNEL f1 =====
NUC1       19F
P1         4.60 usec
PL1        -1.00 dB
SFO1       470.5267040 MHz
SI         131072
SF         470.5162824 MHz
MCM        RM
SSB        0
LB         1.00 Hz
GB         0
PC         3.00

```

# 1-Fluoro-2-iodonaphthalene (4g)

<sup>1</sup>H

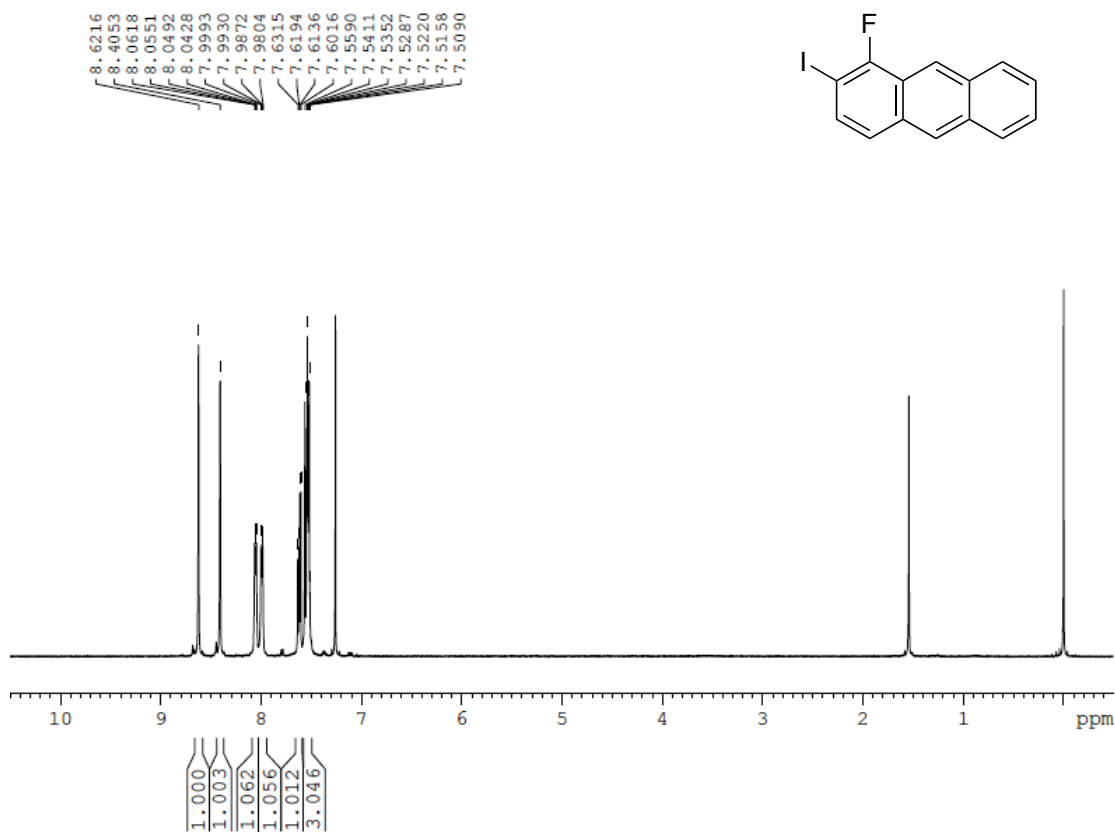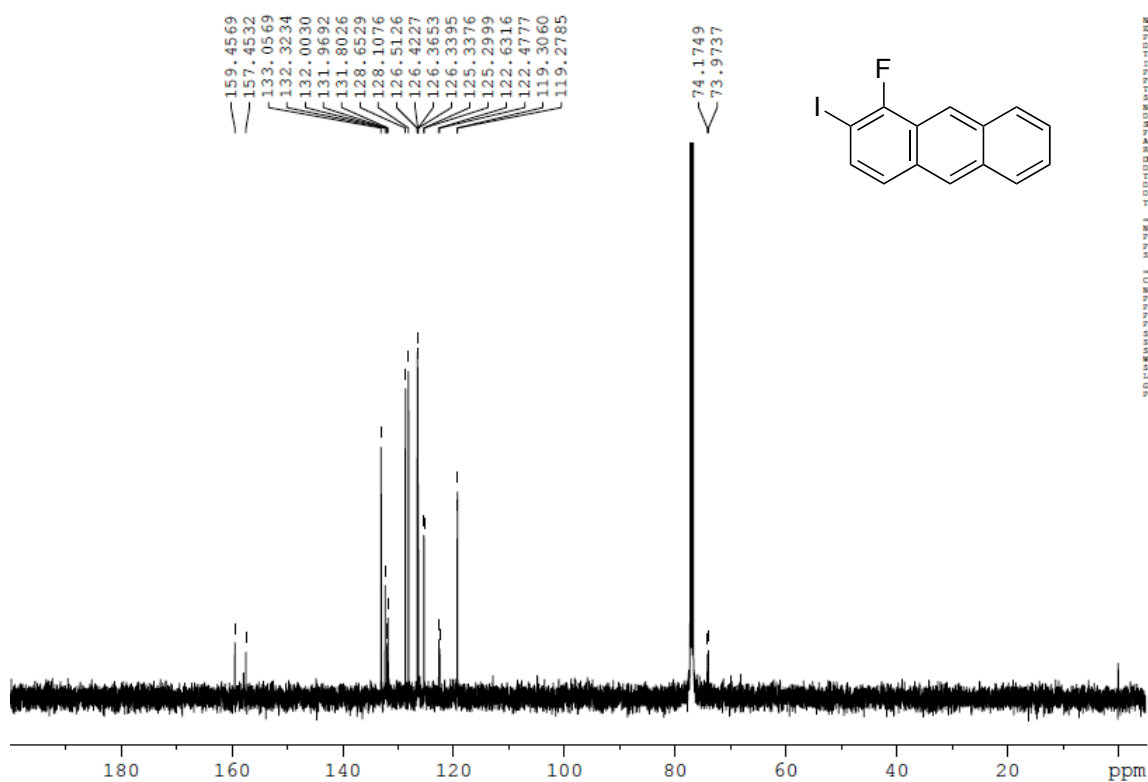

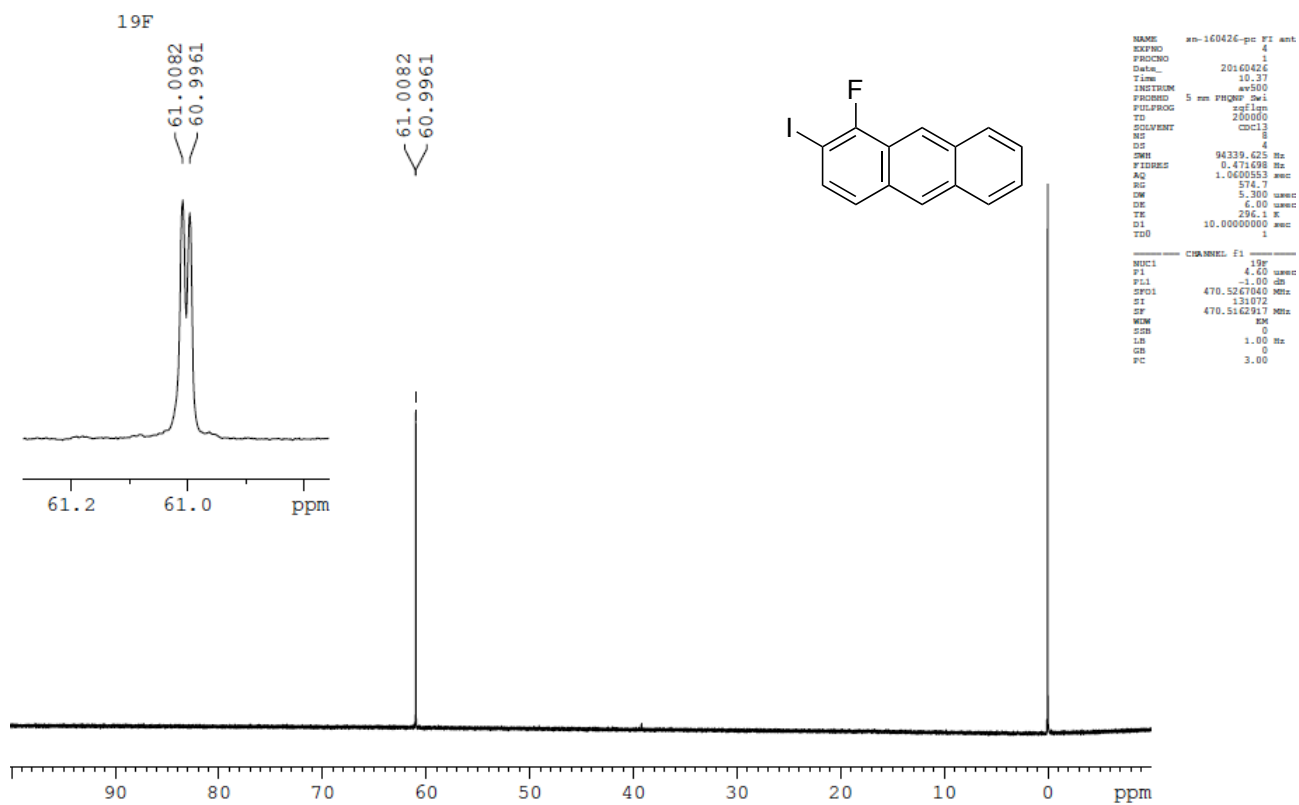

## 2-(Biphenyl-2-yl)-1-fluoroanthracene (1g)

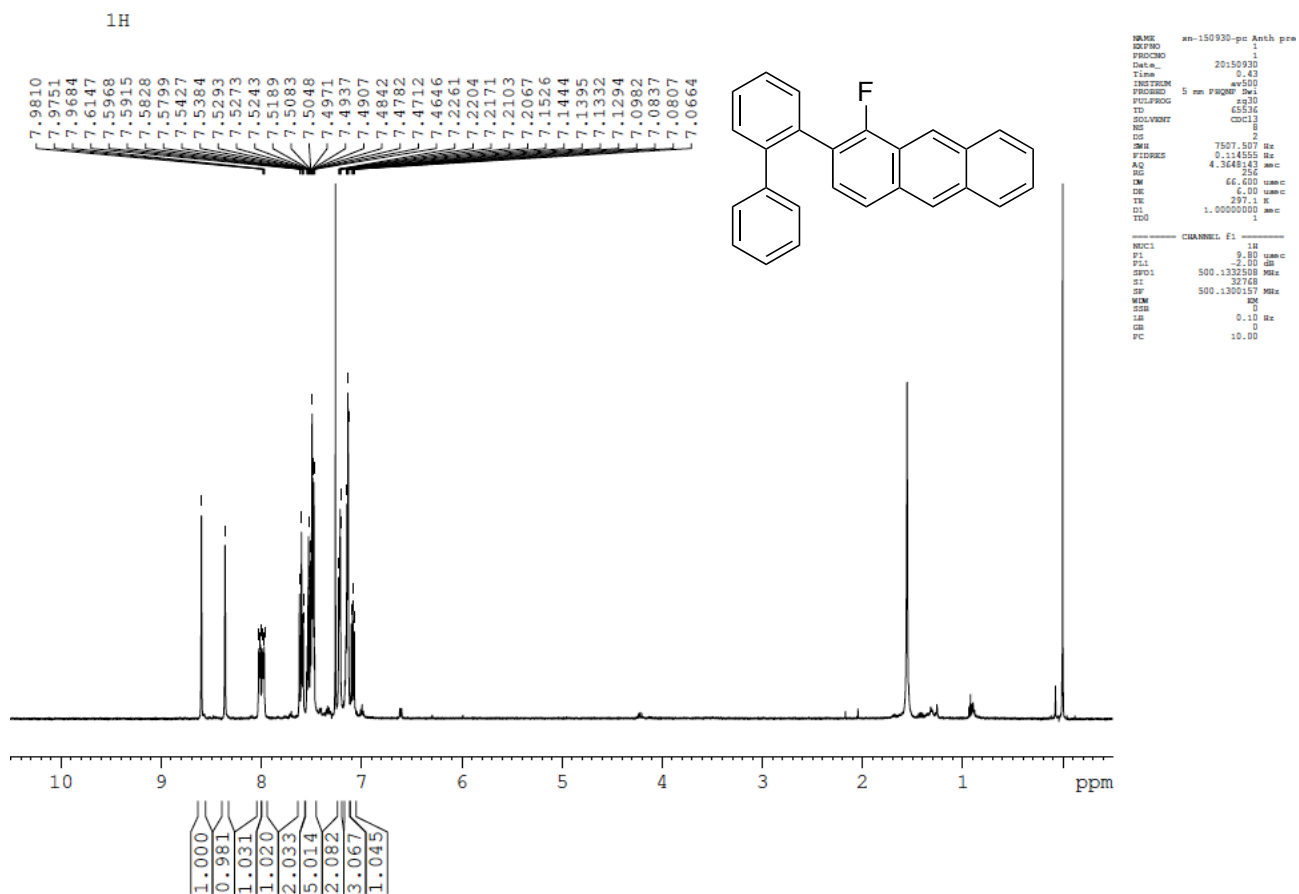

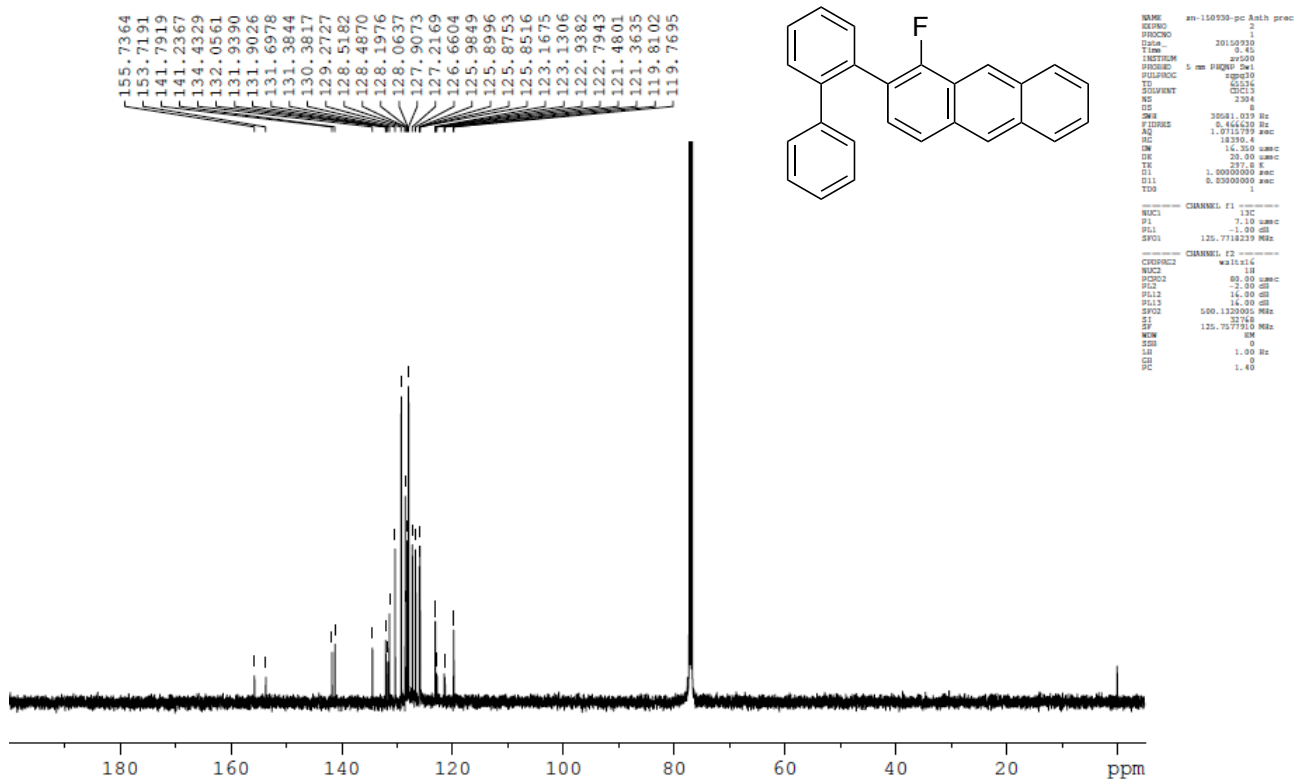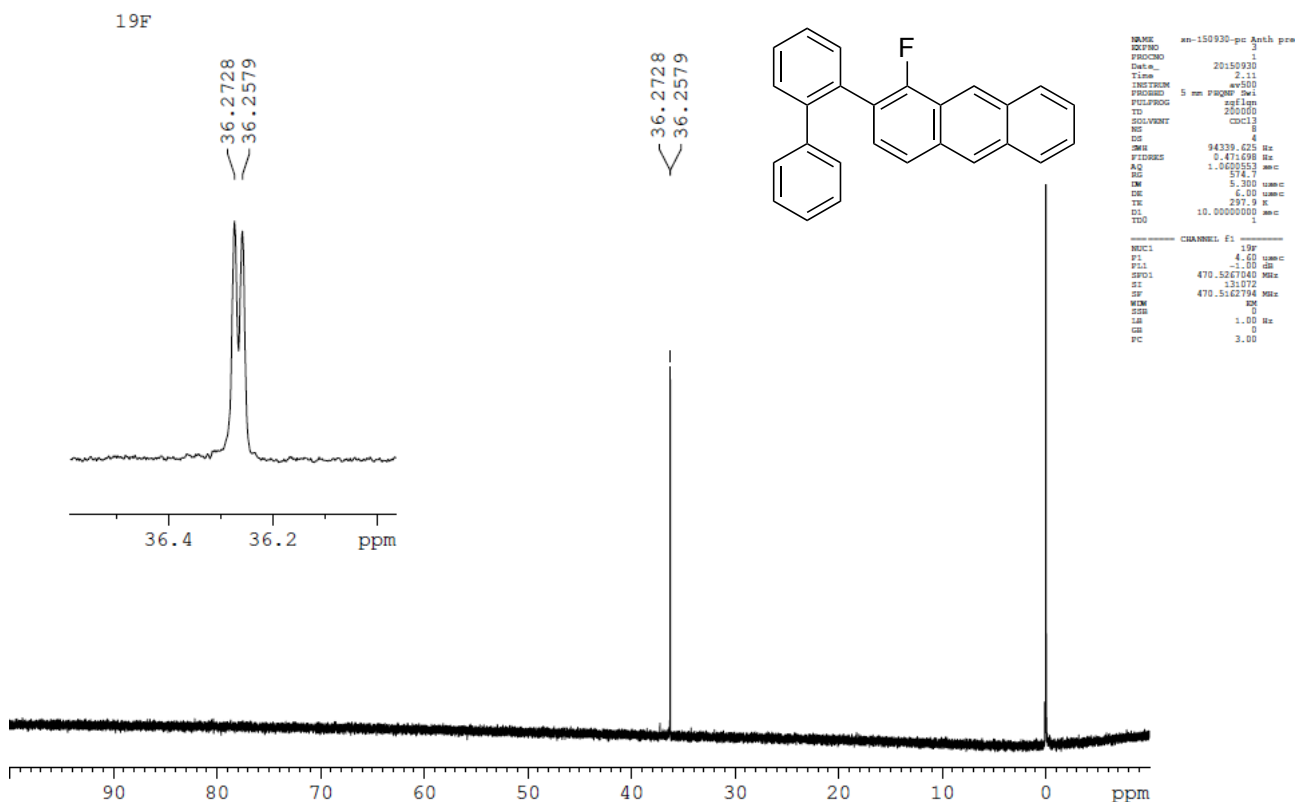

# 2-(Biphenyl-2-yl)-1-chloronaphthalene (1h)

<sup>1</sup>H

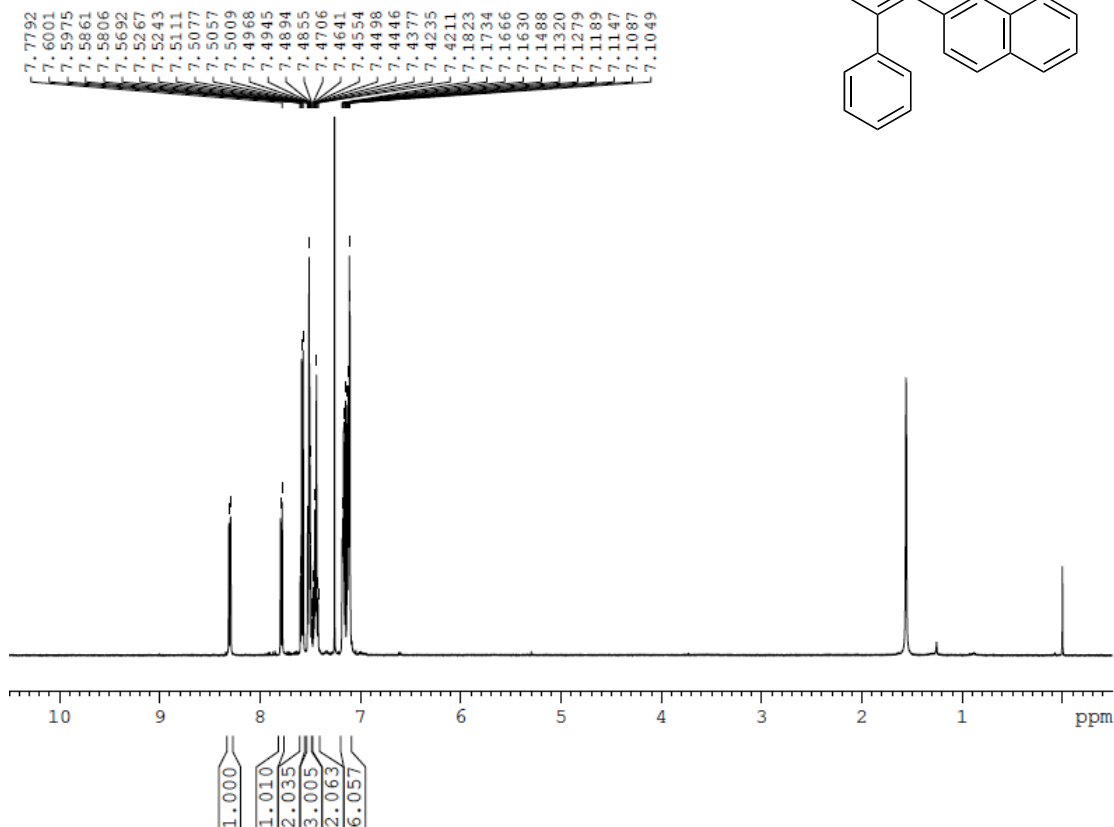

```
NAME an-150914-pc Cl 1G pro
EXPNO 1
PROCNO 1
Date_ 20150914
Time 2.59
INSTRUM av500
PROBHD 5 mm F4007 5e1
PULPROG zgpg30
PCPDPRG 45236
TD 65536
SOLVENT CDCl3
NS 2
DS 2
SWH 7507.107 Hz
FIDRES 0.114555 Hz
AQ 41.3646143 sec
RG 181
CW 66.500 usec
DE 6.00 usec
TE 292.4 K
D1 1.00000000 sec
D11 0
TDS 1
```

===== CHANNEL F1 =====

```
NUC1 13C
P1 9.00 usec
PL1 -2.00 dB
SFO1 500.132008 MHz
SF 500.1300153 MHz
WDM 0
SCB 0
LB 0.10 Hz
GB 0
PC 10.00
```

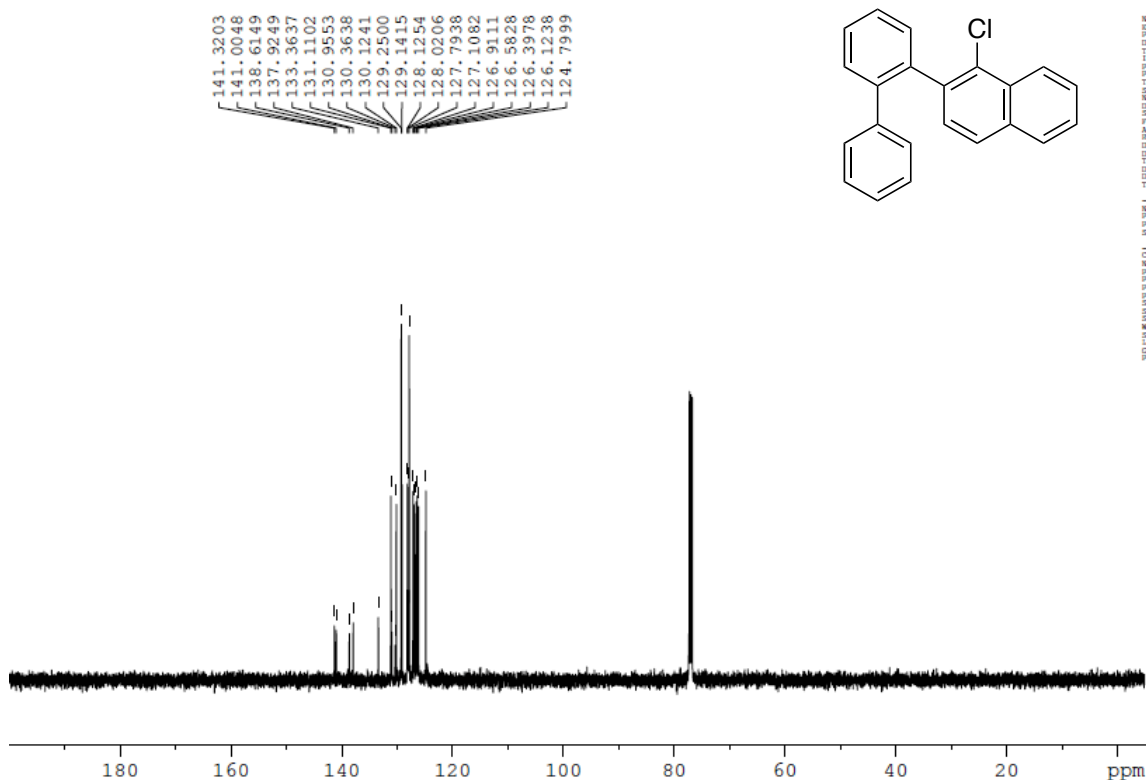

```
NAME an-150914-pc Cl 1G pro
EXPNO 1
PROCNO 1
Date_ 20150914
Time 2.59
INSTRUM av500
PROBHD 5 mm F4007 5e1
PULPROG zgpg30
PCPDPRG 45236
TD 65536
SOLVENT CDCl3
NS 2
DS 2
SWH 30581.578 Hz
FIDRES 0.464430 Hz
AQ 1.0715790 sec
RG 18392.4
CW 16.250 usec
DE 25.00 usec
TE 292.4 K
D1 1.00000000 sec
D11 0
TDS 1
```

===== CHANNEL F1 =====

```
NUC1 13C
P1 7.10 usec
PL1 -1.00 dB
SFO1 125.7718239 MHz
```

===== CHANNEL F2 =====

```
NAME an-150914-pc Cl 1G pro
EXPNO 1
PROCNO 1
Date_ 20150914
Time 2.59
INSTRUM av500
PROBHD 5 mm F4007 5e1
PULPROG zgpg30
PCPDPRG 45236
TD 65536
SOLVENT CDCl3
NS 2
DS 2
SWH 125.7718239 MHz
FIDRES 0.464430 Hz
AQ 1.0715790 sec
RG 18392.4
CW 16.250 usec
DE 25.00 usec
TE 292.4 K
D1 1.00000000 sec
D11 0
TDS 1
```

===== CHANNEL F2 =====

```
NUC2 13C
P2 7.10 usec
PL2 -1.00 dB
SFO2 125.7718239 MHz
```

## 1H

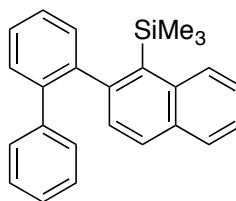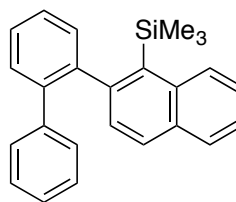

## 2-(Biphenyl-2-yl)-1-bromonaphthalene (1i)

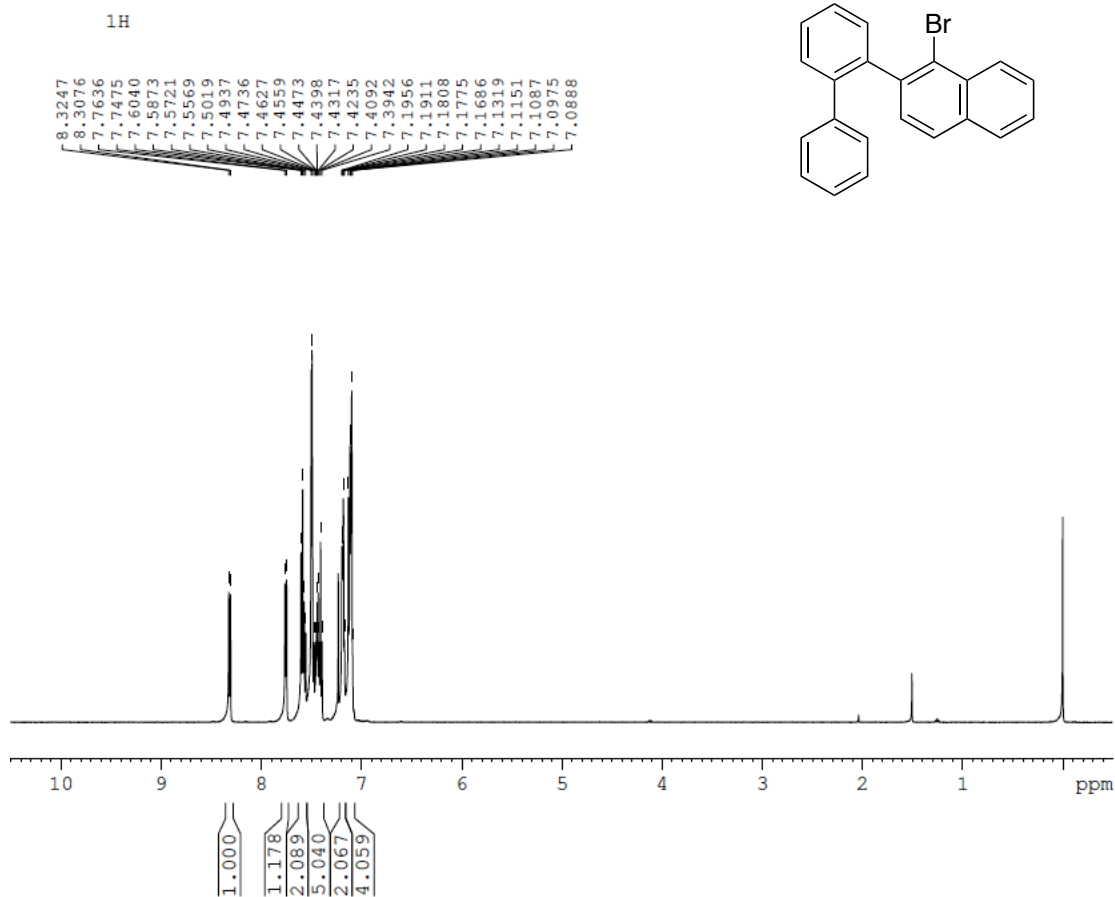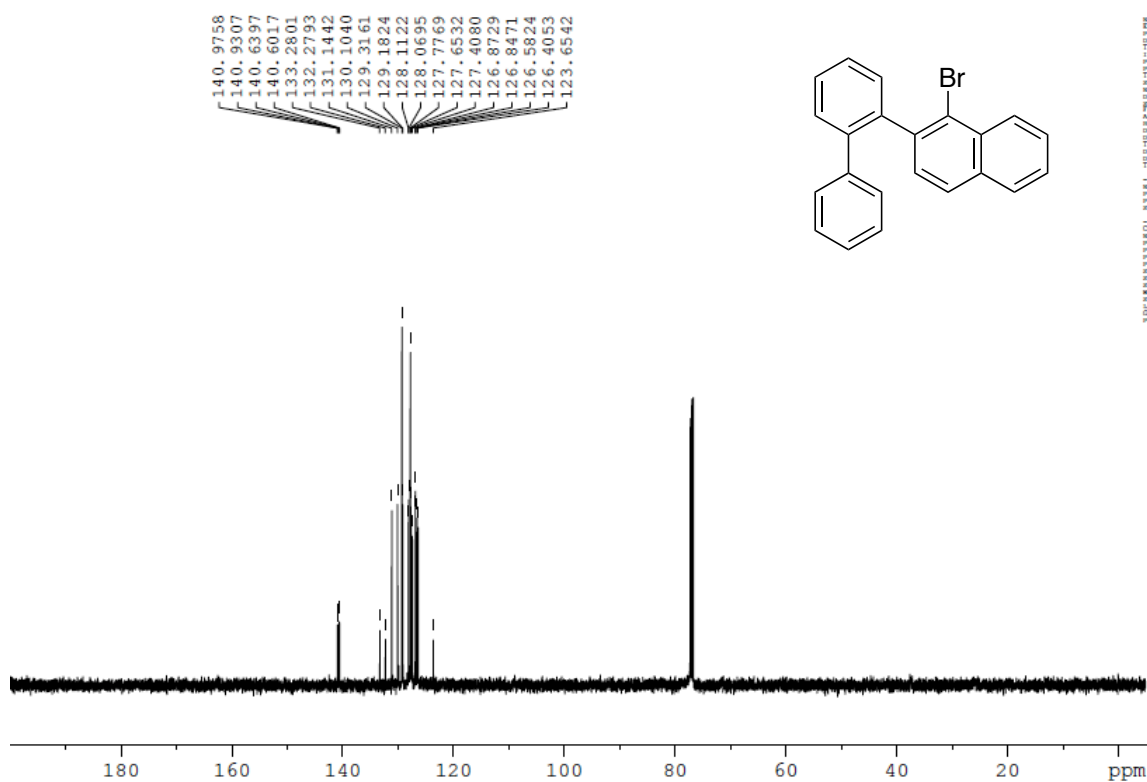

2-(Biphenyl-2-yl)-1-iodonaphthalene (1j)

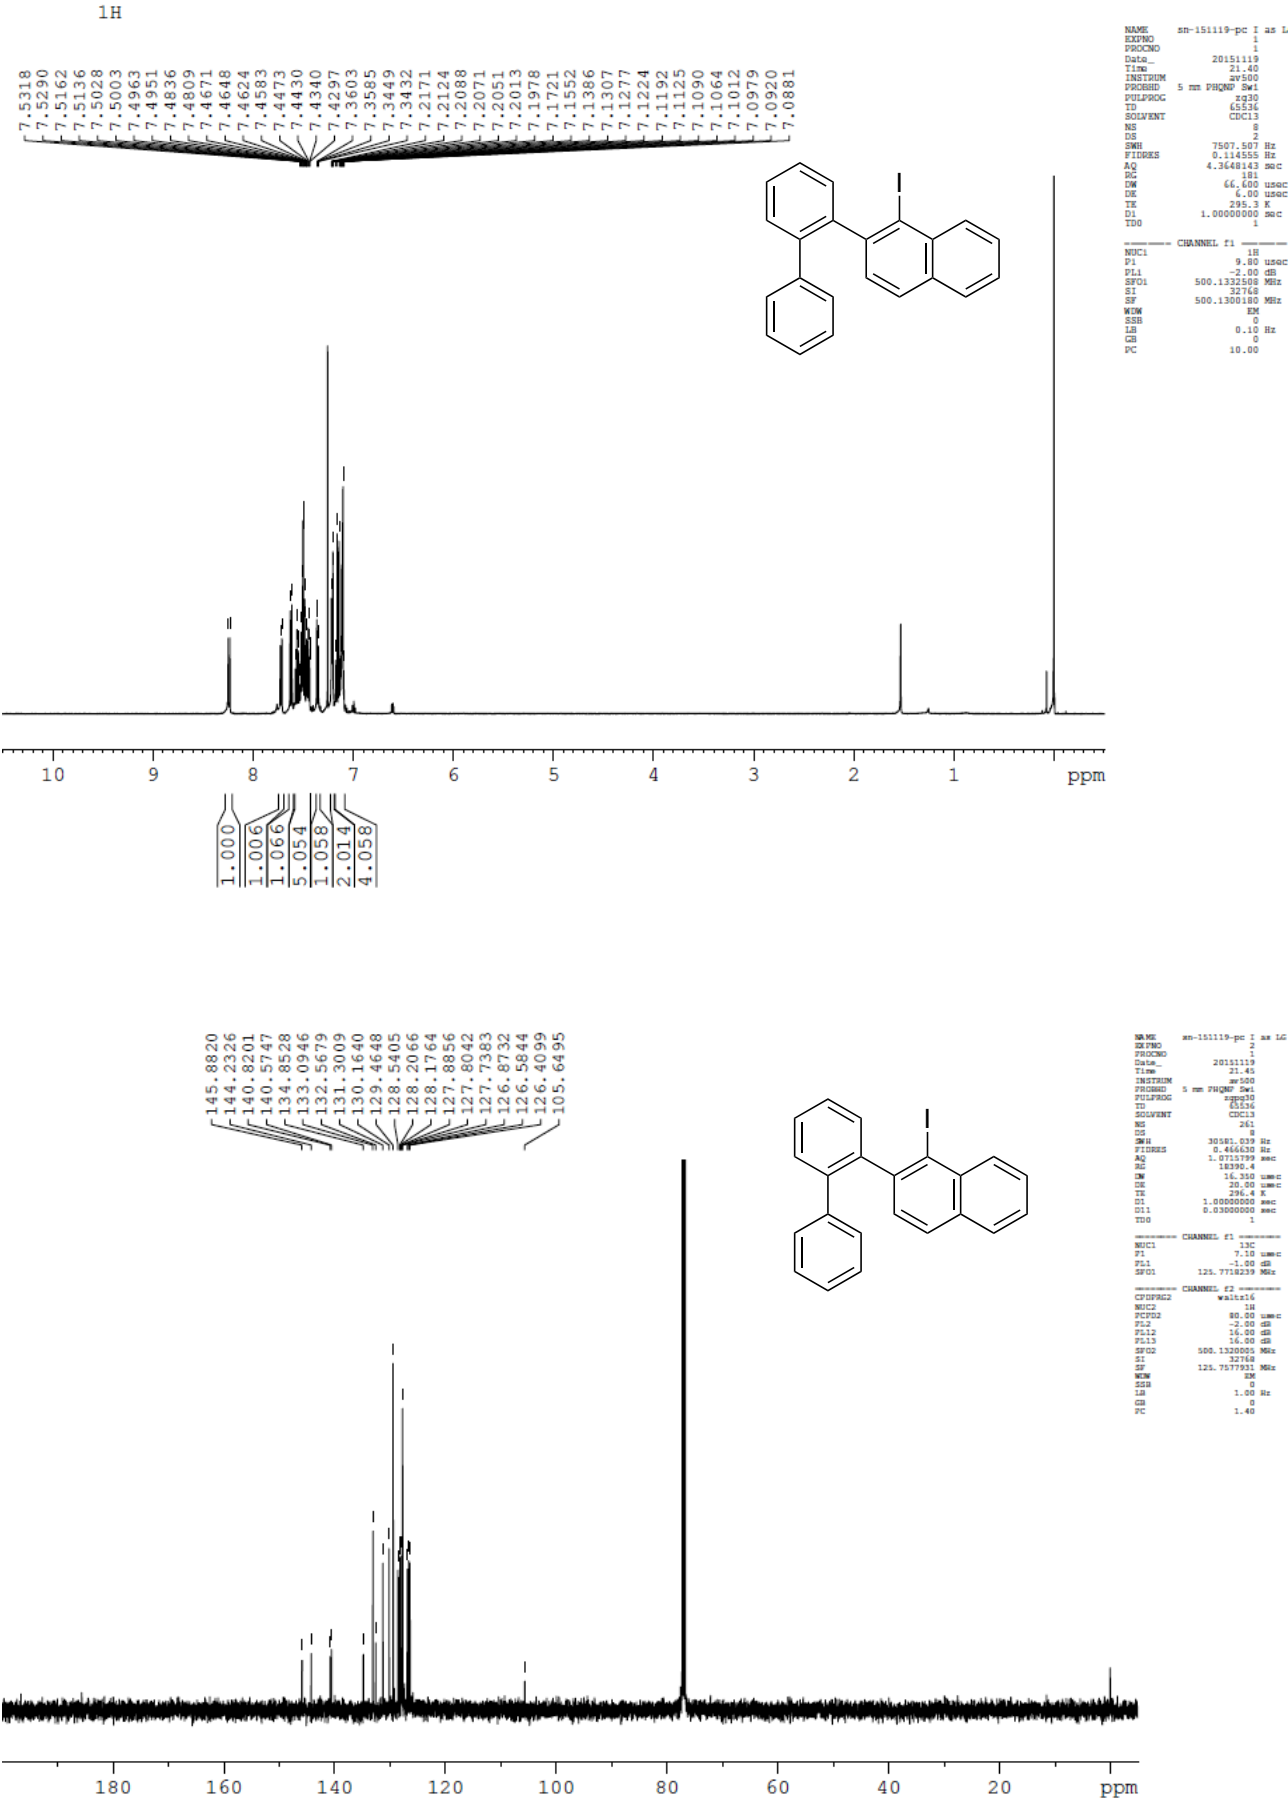



2-(Biphenyl-2-yl)naphthalen-1-amine (1k)

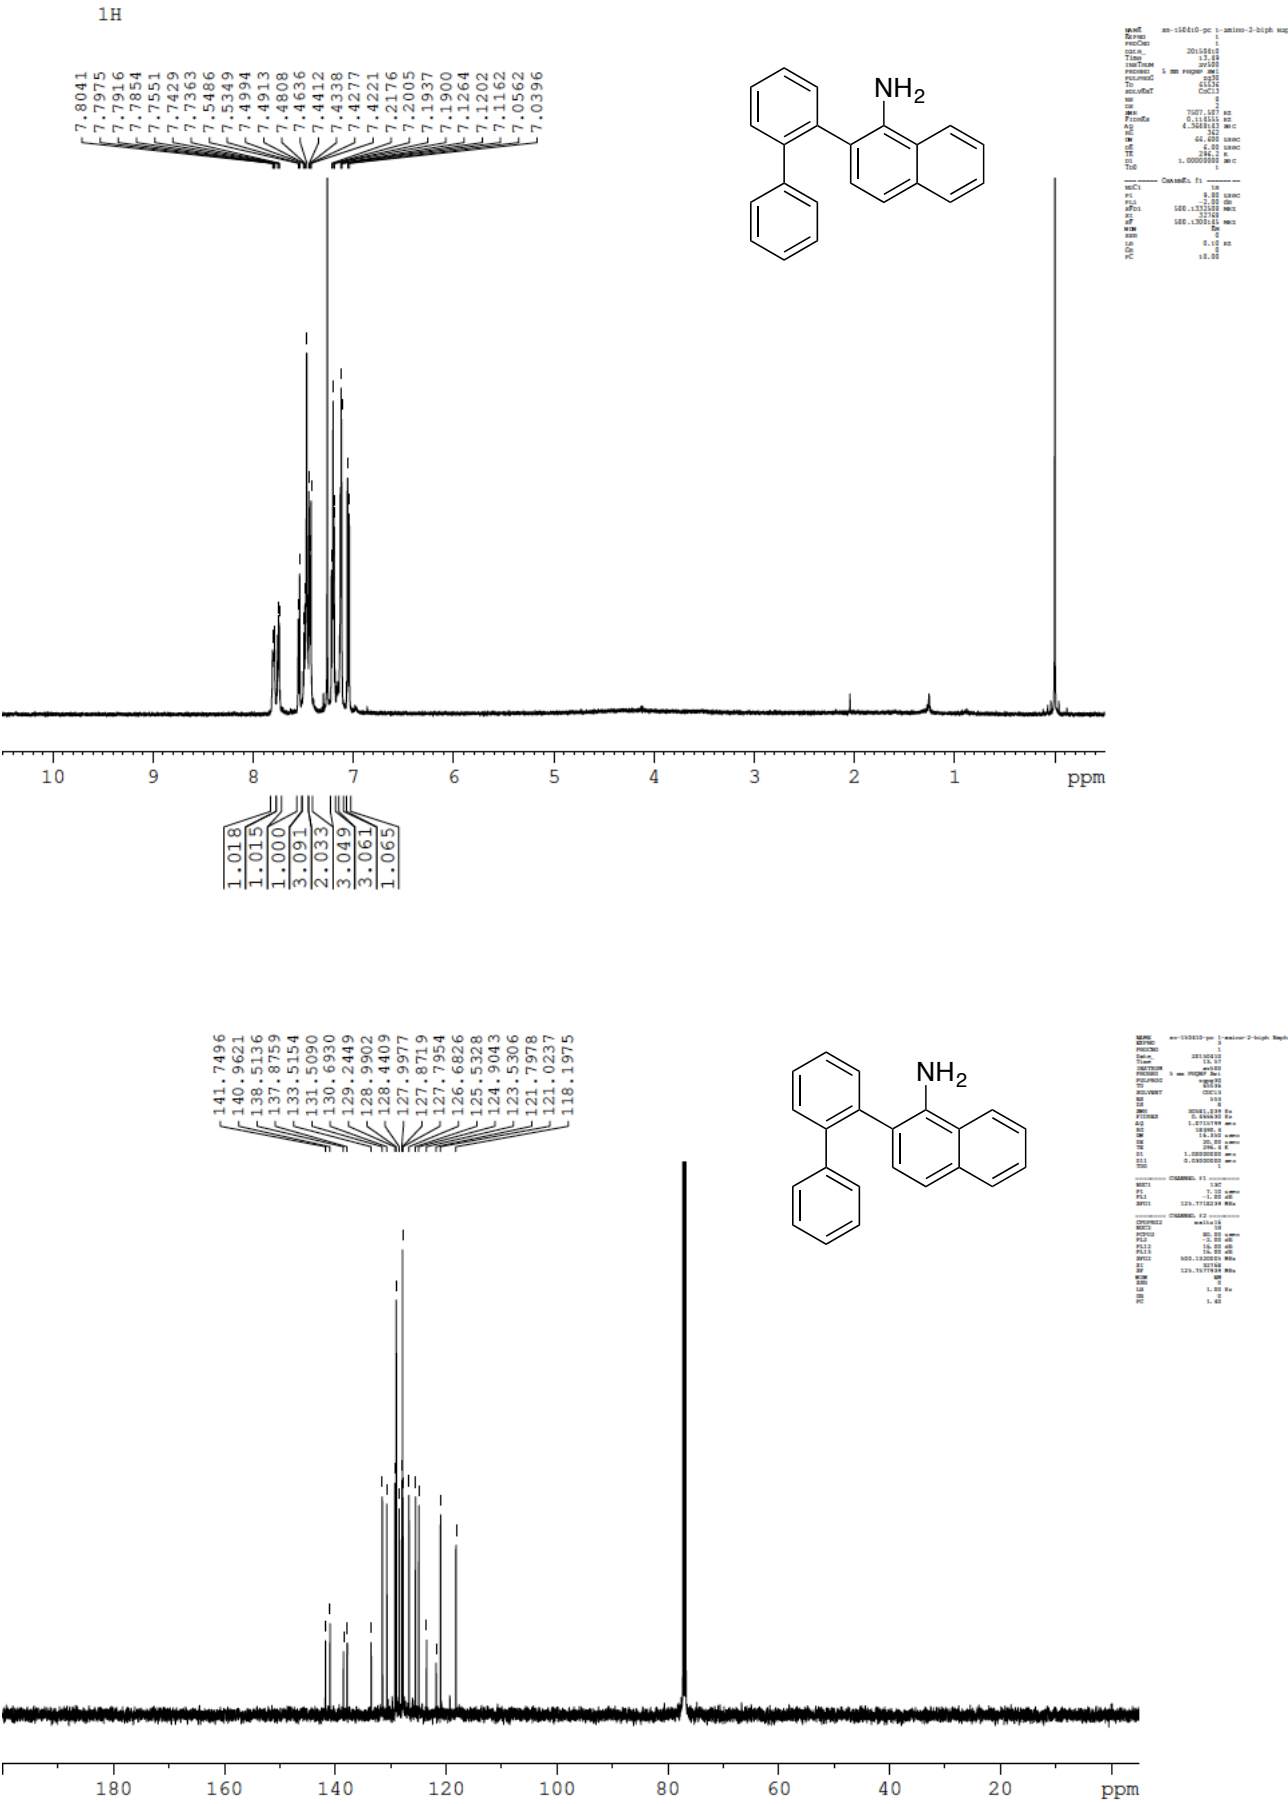

Benzo[*f*]tetraphene (2a)

<sup>1</sup>H

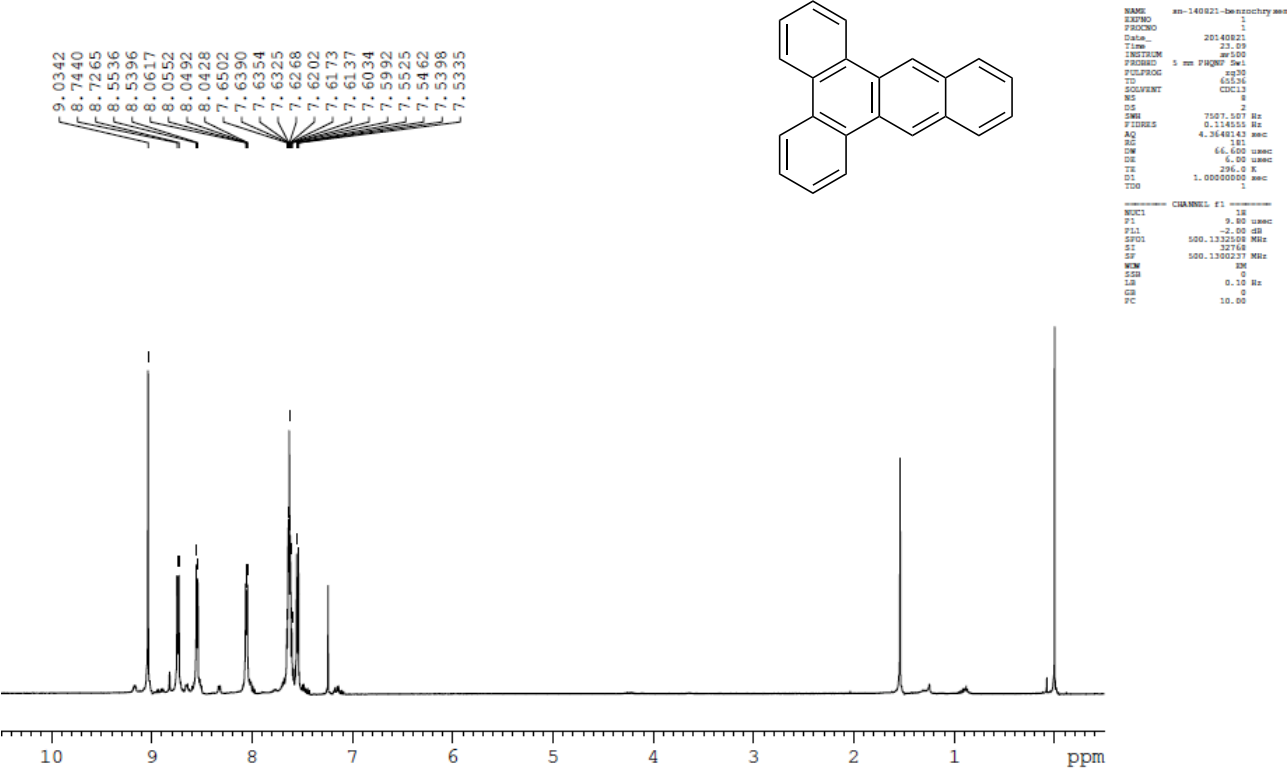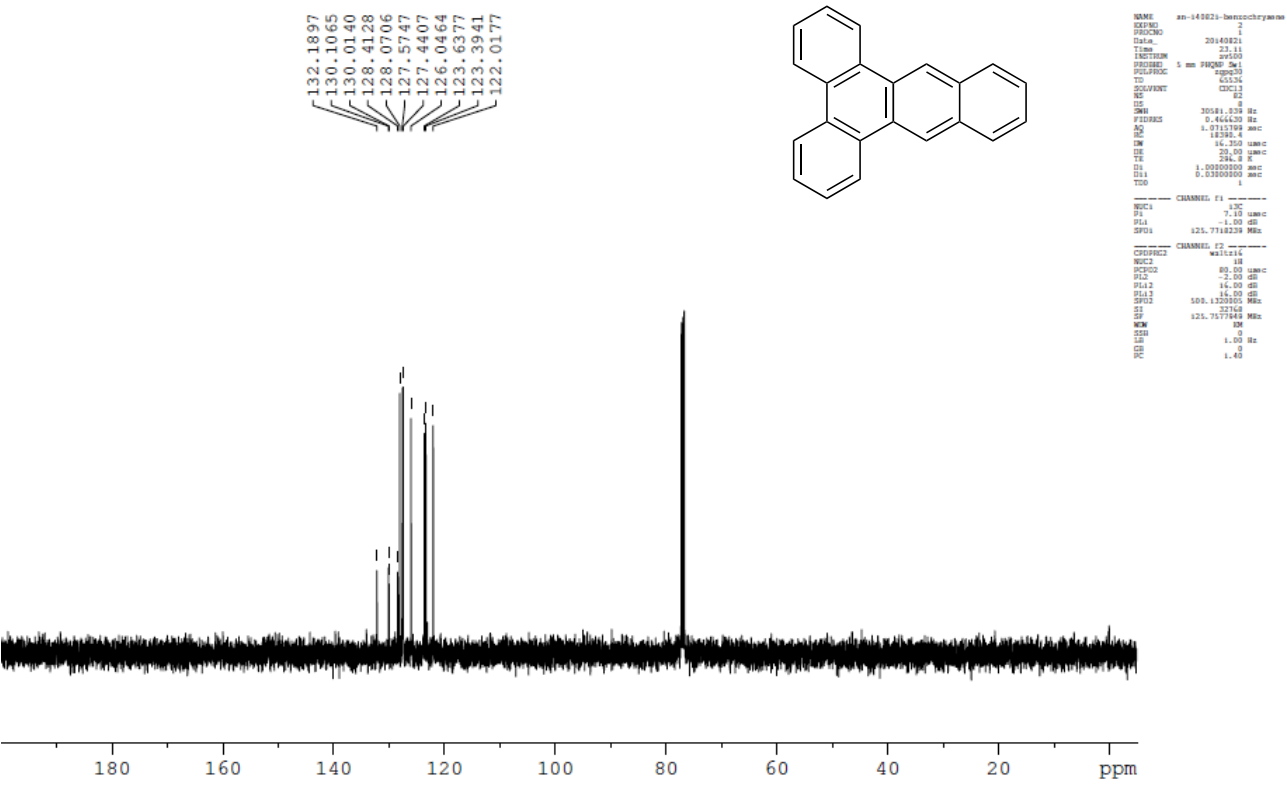

2-Methylbenzo[f]tetraphene (2b)

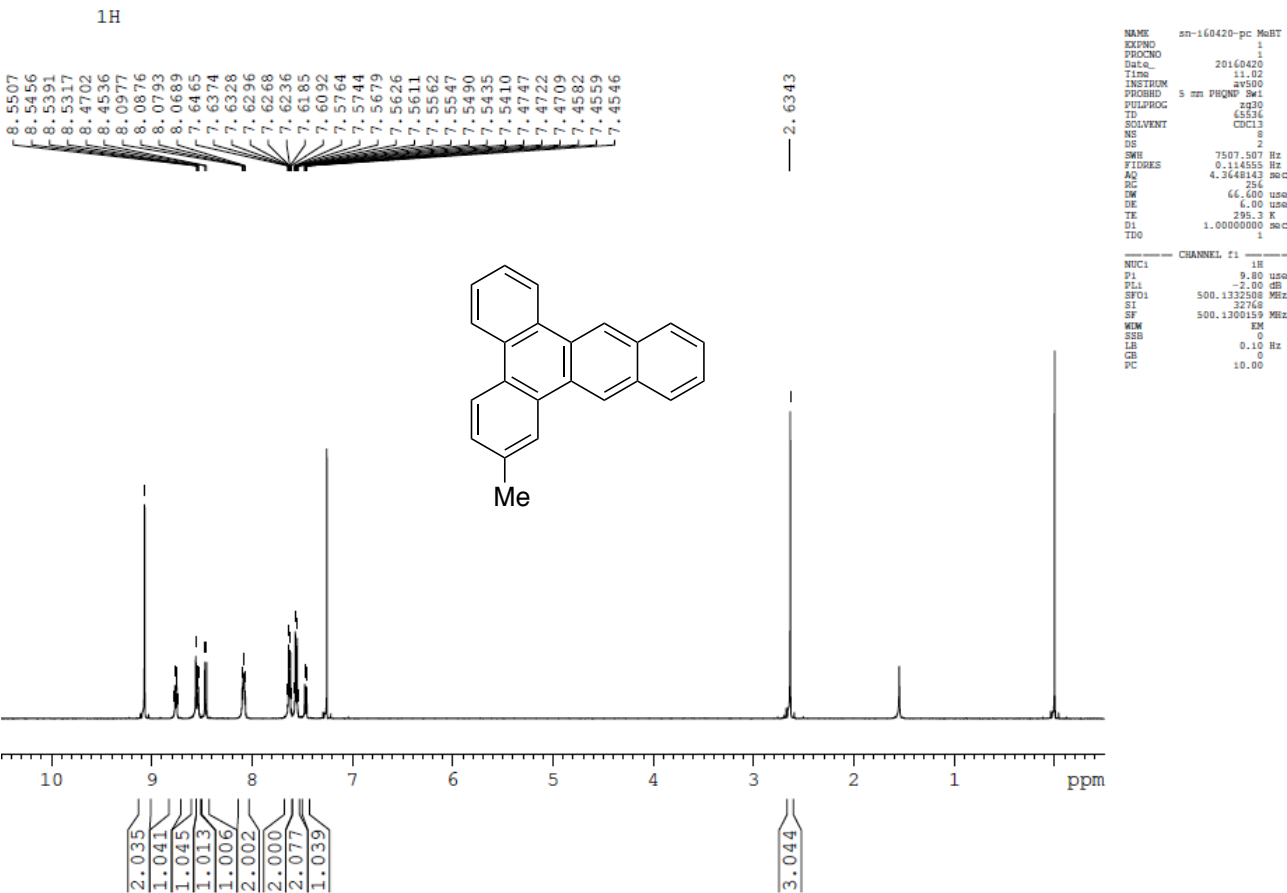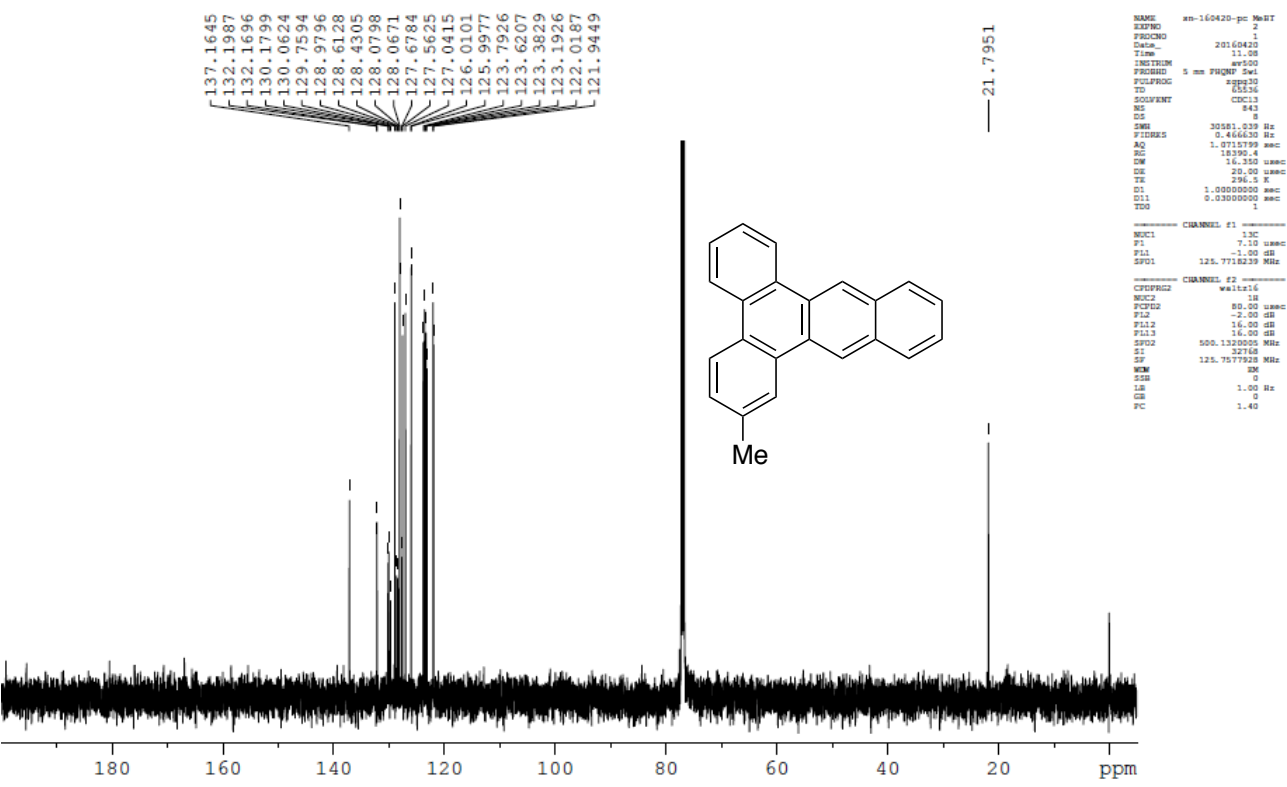

# 2-Butylbenzo[f]tetraphene (2c)

<sup>1</sup>H

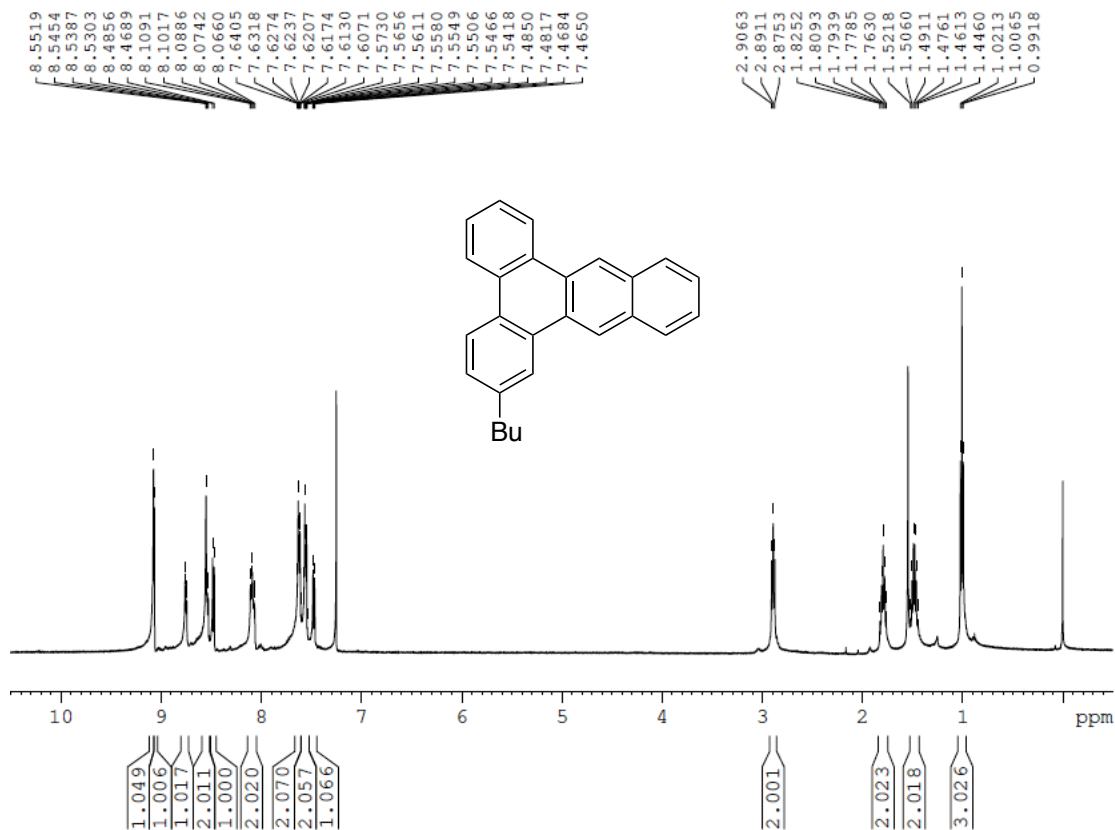

```

NAME      sn-160516-pc BuBT
EXPNO     1
PROCNO    1
Data_     20160516
Time      10.49
INSTRUM   av500
PROBHD    5 mm PUNIP 5w1
PULPROG   zgpg30
TD         65536
SOLVENT    CDCl3
NS         8
DS         2
SWH        7507.507 Hz
FIDRES     0.114555 Hz
AQ         4.3648143 sec
RG         181
DE         66.600 usec
TE         295.4 K
D1         1.00000000 sec
TD0        1
----- CHANNEL f1 -----
NUC1       1H
P1         9.80 usec
PL1        -2.00 dB
SFO1       500.1332508 MHz
SF         500.13300168 MHz
MIM        0
SSB        0
GB         0.10 Hz
PC         10.00
  
```

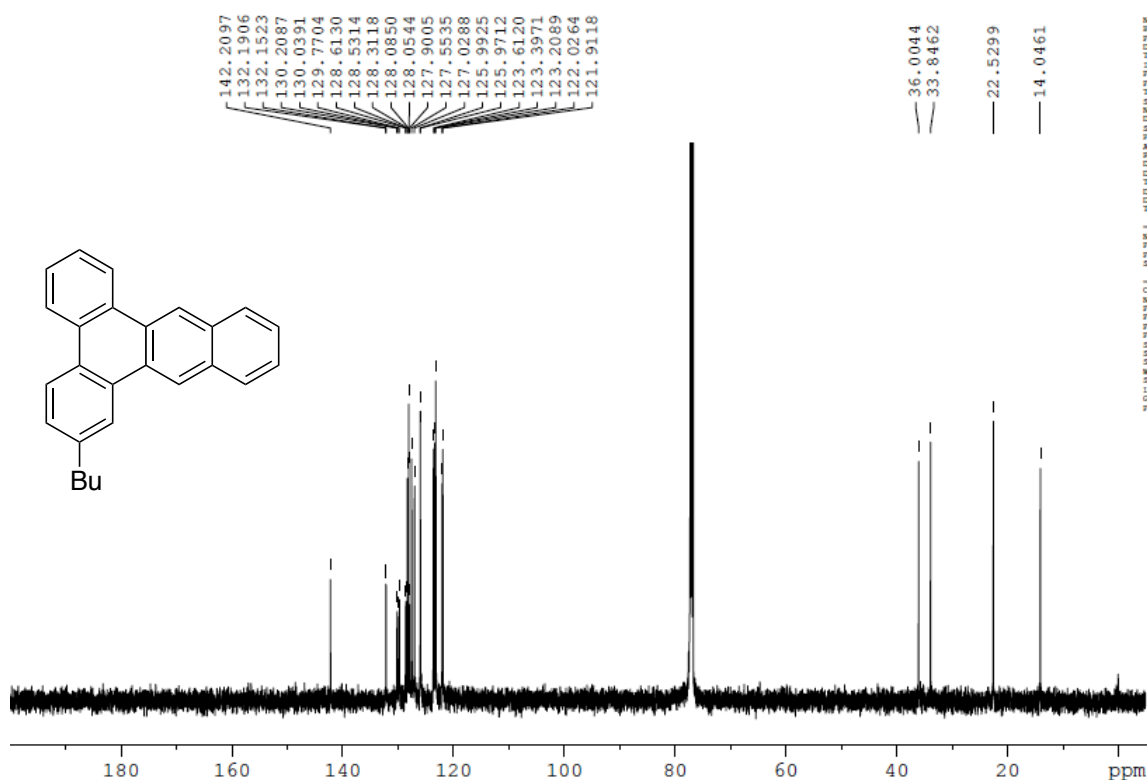

```

NAME      sn-160516-pc BuBT
EXPNO     2
PROCNO    1
Data_     20160516
Time      10.56
INSTRUM   av500
PROBHD    5 mm PUNIP 5w1
PULPROG   zgpg30
TD         65536
SOLVENT    CDCl3
NS         8
DS         2
SWH        30581.039 Hz
FIDRES     0.466630 Hz
AQ         1.9715799 sec
RG         18392.4
DE         16.300 usec
TE         296.7 K
D1         1.00000000 sec
D11        0.03000000 sec
TD0        1
----- CHANNEL f1 -----
NUC1       13C
P1         7.10 usec
PL1        -1.00 dB
SFO1       125.7577930 MHz
----- CHANNEL f2 -----
CPDPRG2   waltz16
NUC2       1H
PCPD2      80.00 usec
PL2        -2.00 dB
PL12       16.00 dB
PL13       16.00 dB
SFO2       500.1320005 MHz
SF         500.132750 MHz
MIM        0
SSB        0
GB         1.00 Hz
PC         1.40
  
```

## 2-Fluorobenzo[*f*]tetraphene (2d)

<sup>1</sup>H

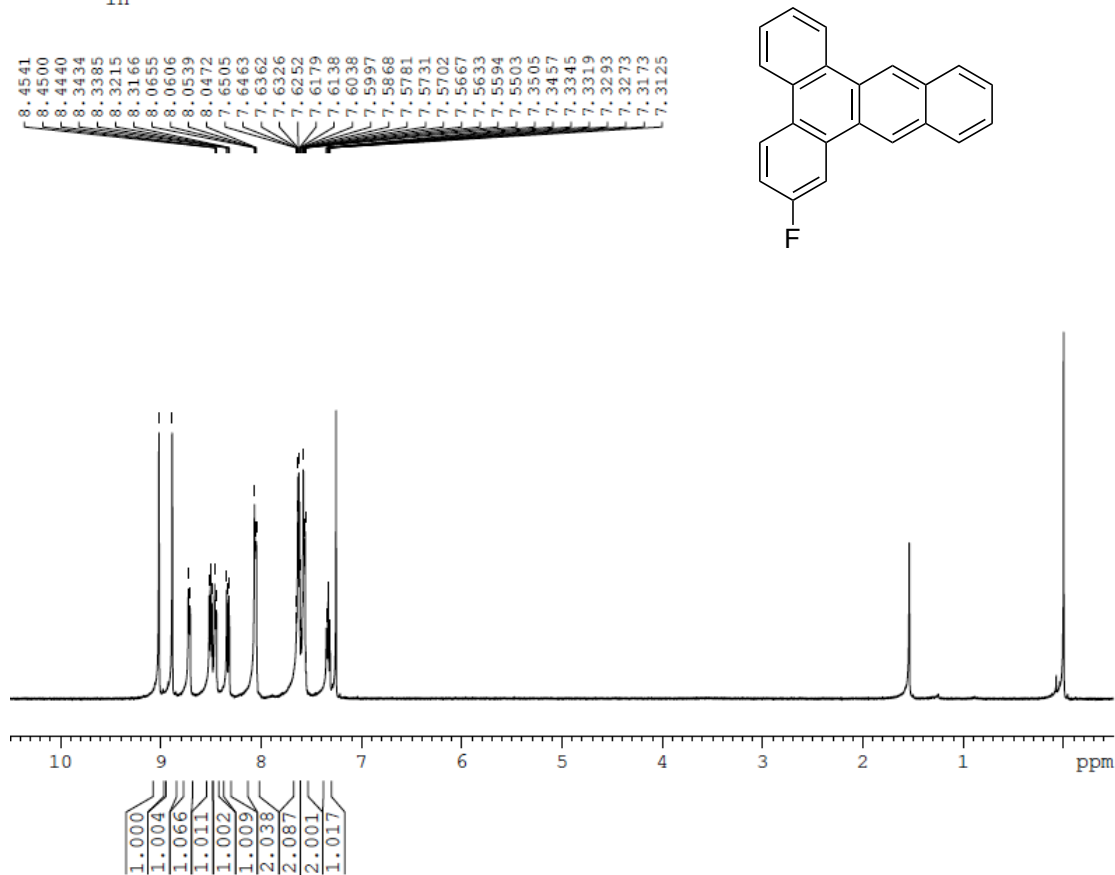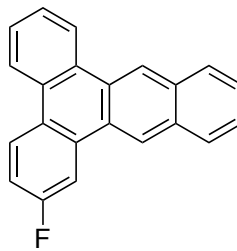

```

NAME      an-160415-pc F NT 2
EXPNO    1
PROCNO    1
Date_     20160416
Time      14.48
INSTRUM    av500
PROBHD    5 mm FPGMPC Sw1
PULPROG    zg30
TD         65536
SOLVENT    CDCl3
NS         8
DS         2
SWH        7507.507 Hz
FIDRES     0.114555 Hz
AQ         4.3648143 sec
RG         181
CW         66.6000 usec
DE         6.00 usec
TE         295.4 K
D1         1.00000000 sec
TD0        1
  
```

---

```

CHANNEL F1
NUC1      1H
P1         9.80 usec
PL1        -2.00 dB
SFO1      500.1320508 MHz
SI         32768
SF         500.1320508 MHz
WDW        EM
SSB        0
LB         0.10 Hz
GB         0
PC         10.00
  
```

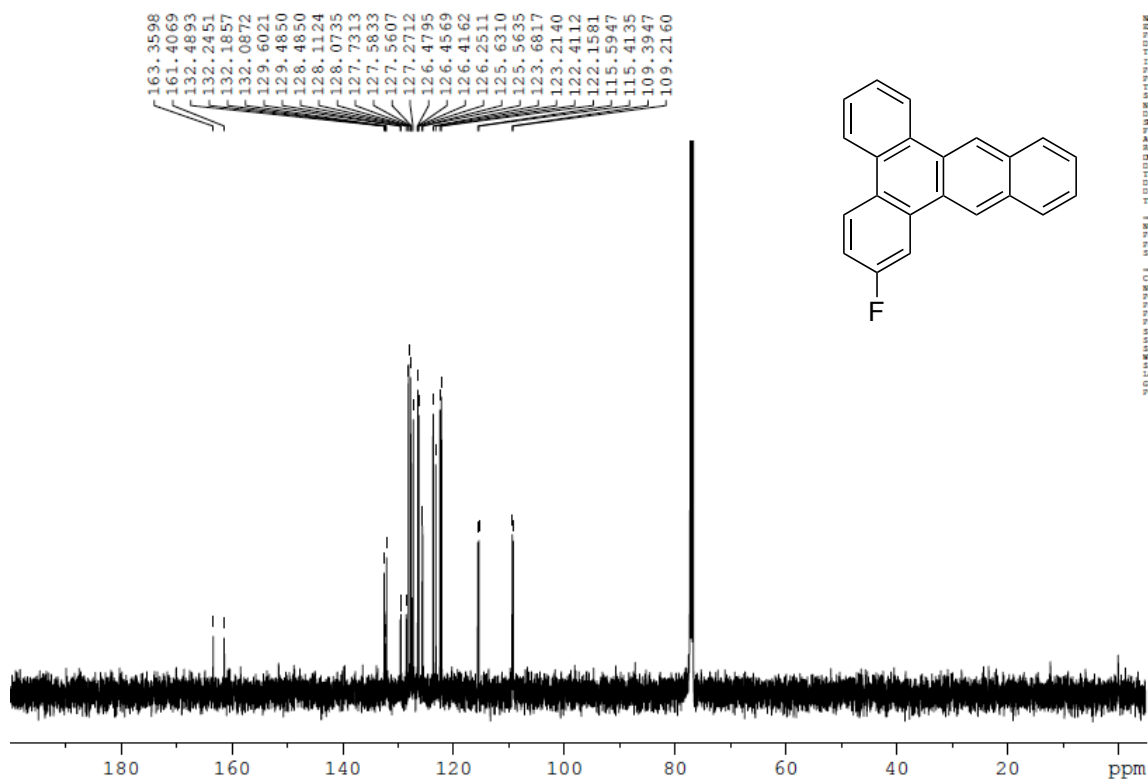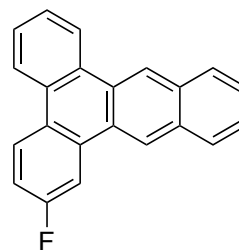

```

NAME      an-160415-pc F NT 2
EXPNO    2
PROCNO    1
Date_     20160416
Time      14.57
INSTRUM    av500
PROBHD    5 mm FPGMPC Sw1
PULPROG    zgpg30
TD         65536
SOLVENT    CDCl3
NS         8
DS         2
SWH        30581.039 Hz
FIDRES     0.464630 Hz
AQ         1.071379 sec
RG         18390.4
CW         16.350 usec
DE         20.00 usec
TE         296.7 K
D1         1.00000000 sec
D11        0.03000000 sec
TD0        1
  
```

---

```

CHANNEL F1
NUC1      13C
P1         7.10 usec
PL1        -1.00 dB
SFO1      125.7713239 MHz
  
```

---

```

CHANNEL F2
NAME      wait16
NUC2      1H
PCPD2     80.00 usec
PLD2      -2.00 dB
PL12      16.00 dB
SFO2      500.1320508 MHz
SI         32768
SF         125.7577928 MHz
WDW        EM
SSB        0
LB         1.00 Hz
GB         0
PC         1.40
  
```

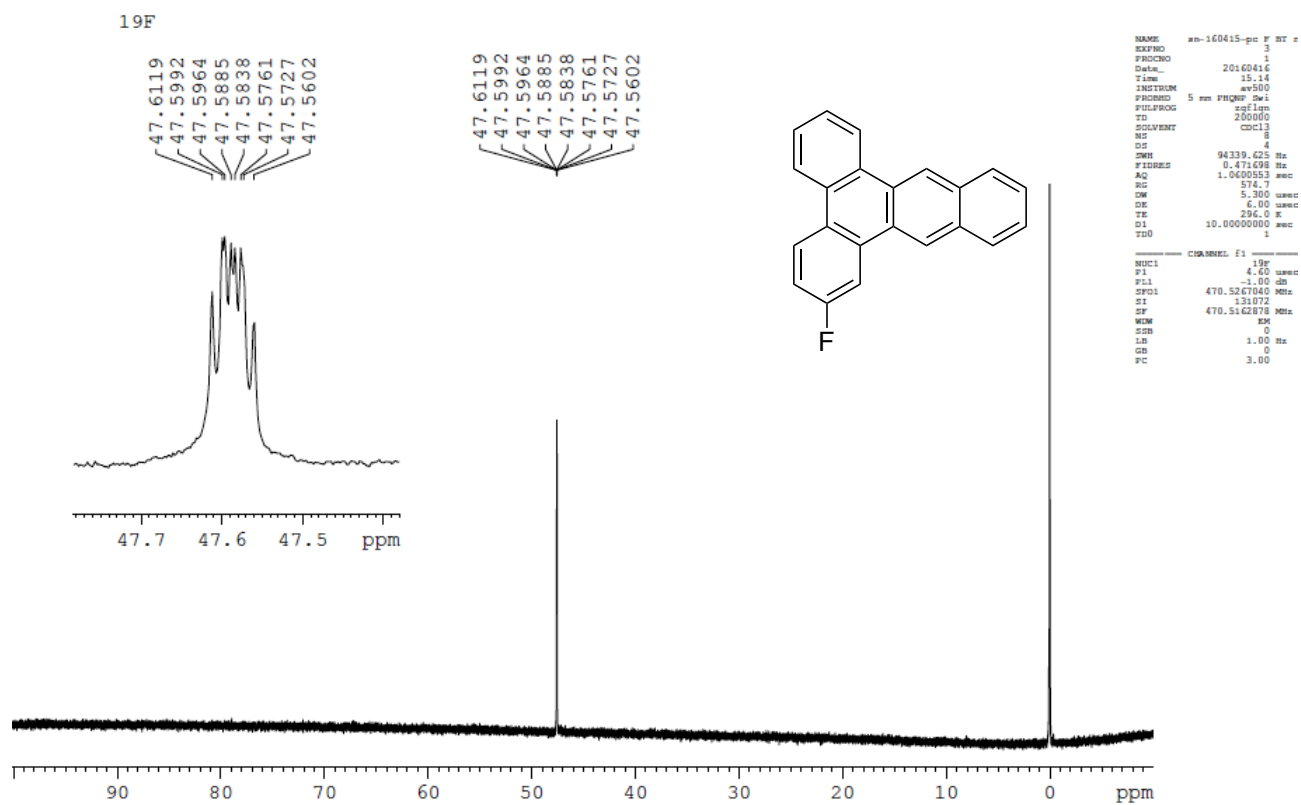

## 2-Chlorobenzo[f]tetraphene (2e)

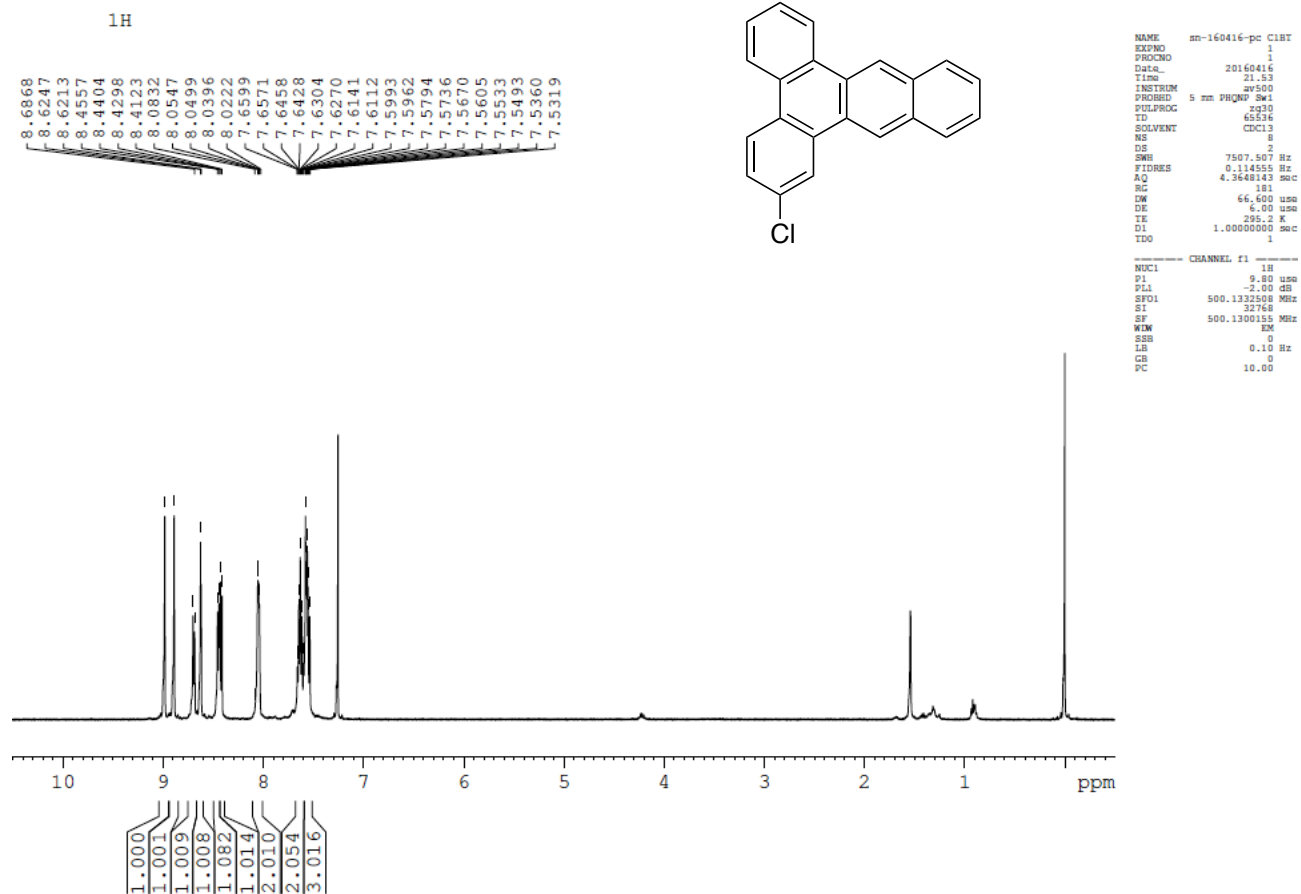

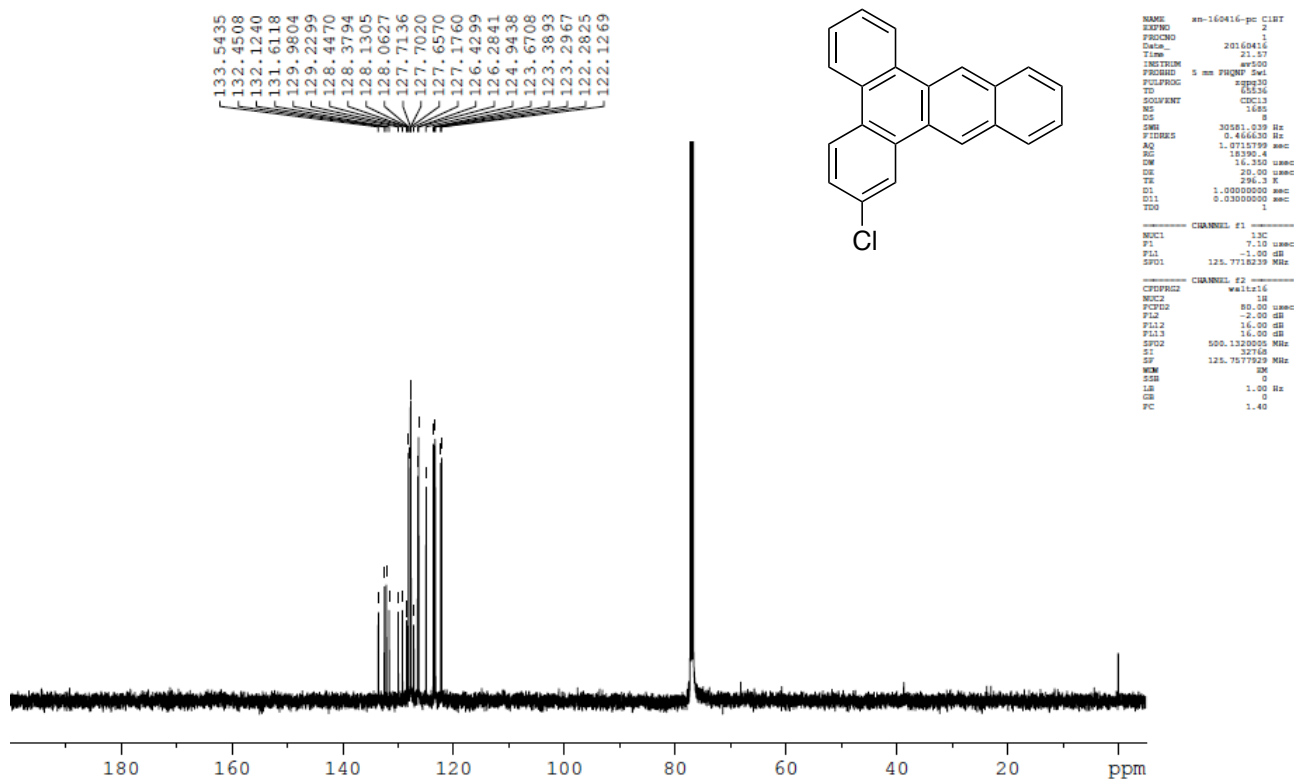

## 2-Phenylbenzo[f]tetraphene (2f)

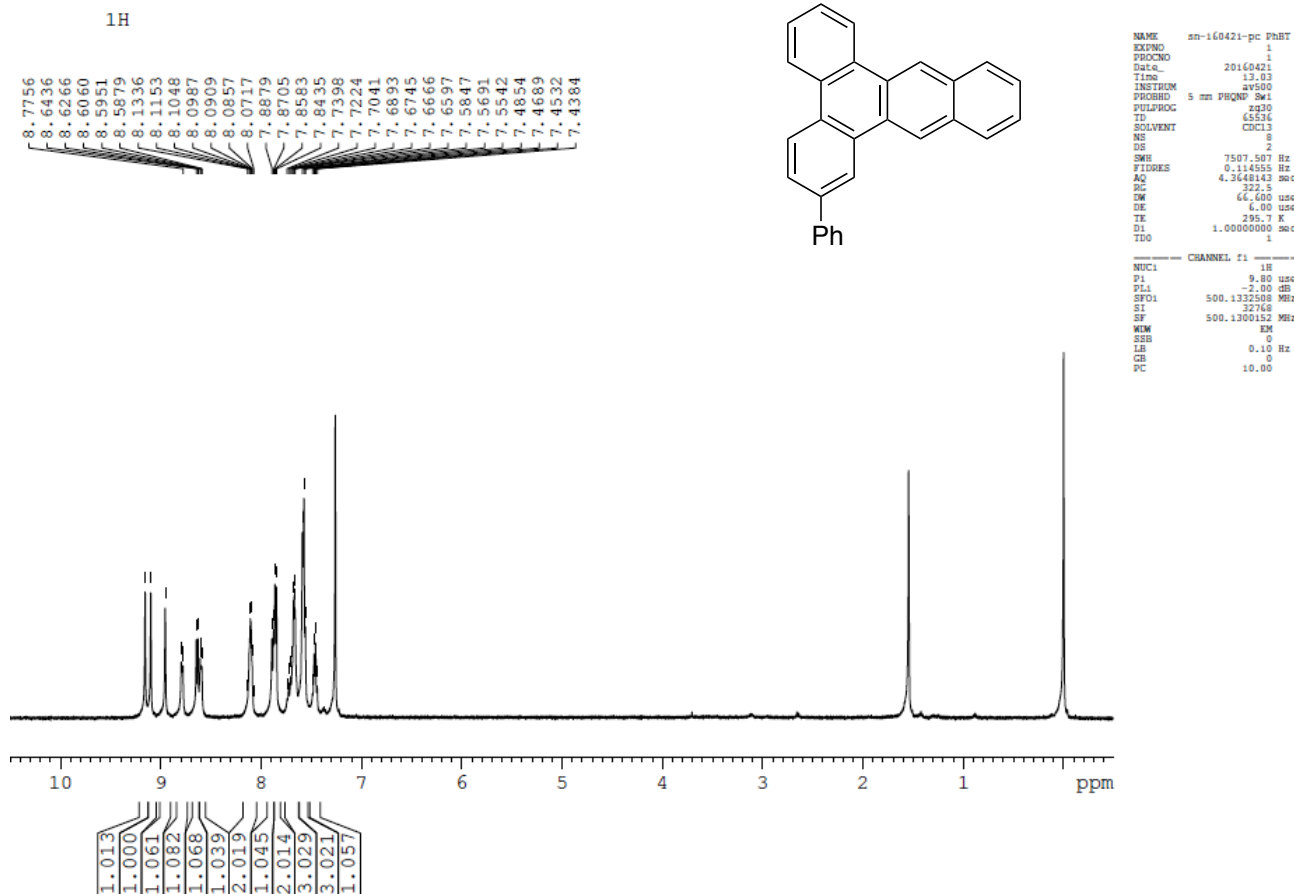

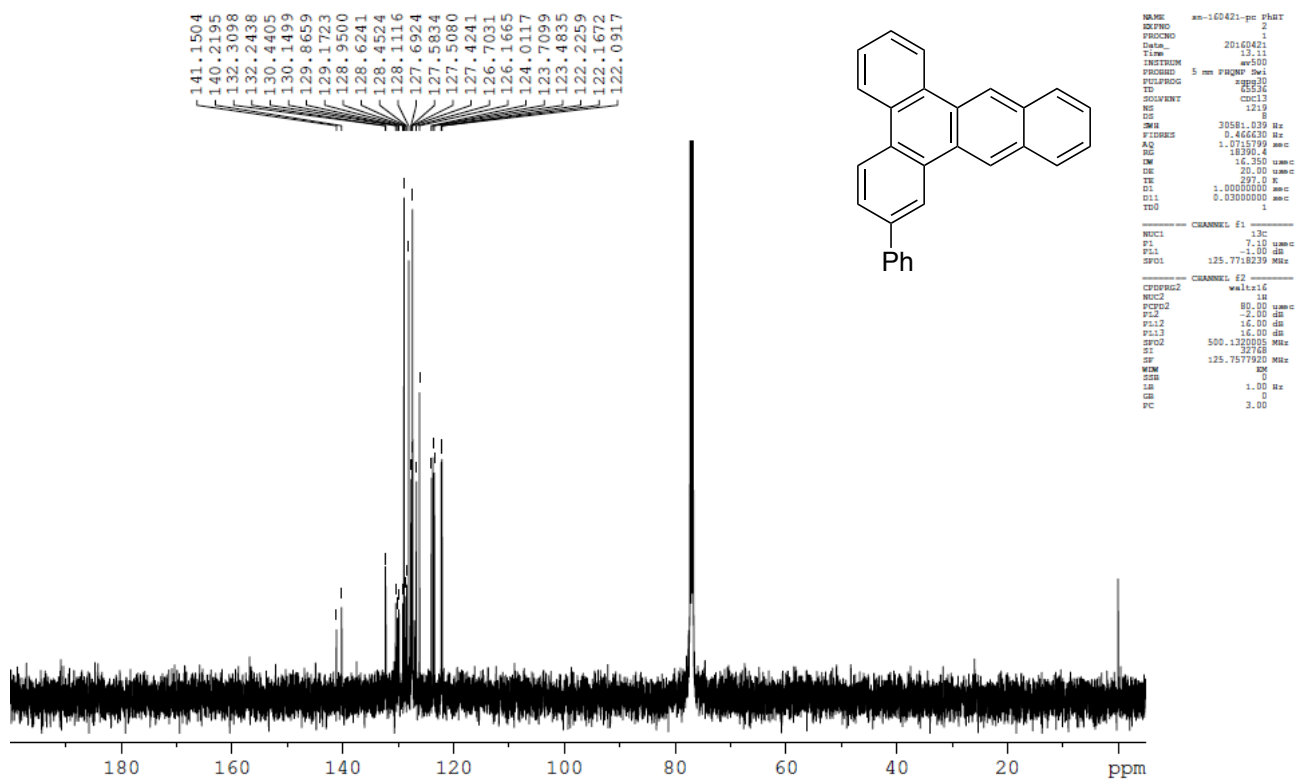

## Dibenzo[*a,c*]tetracene (2g)

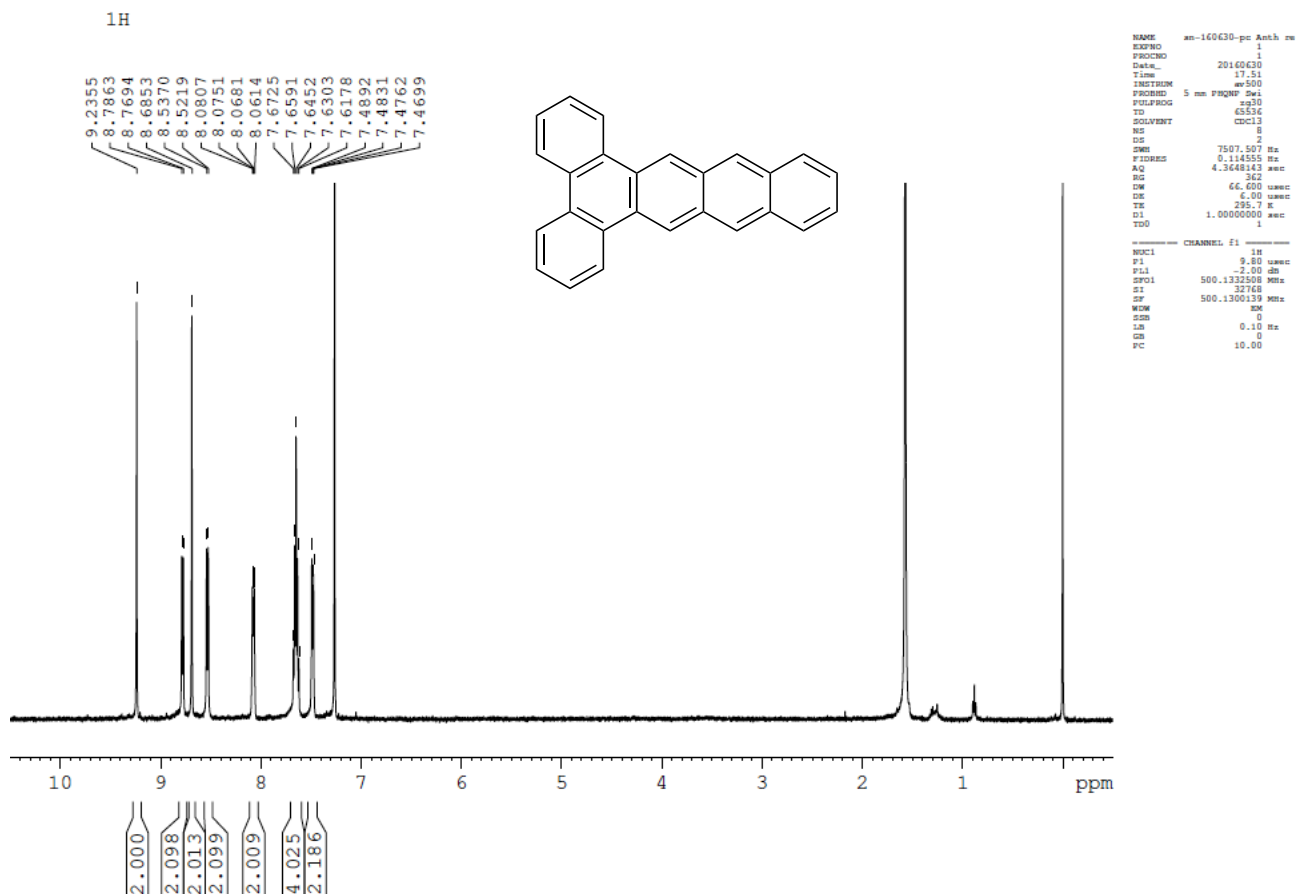



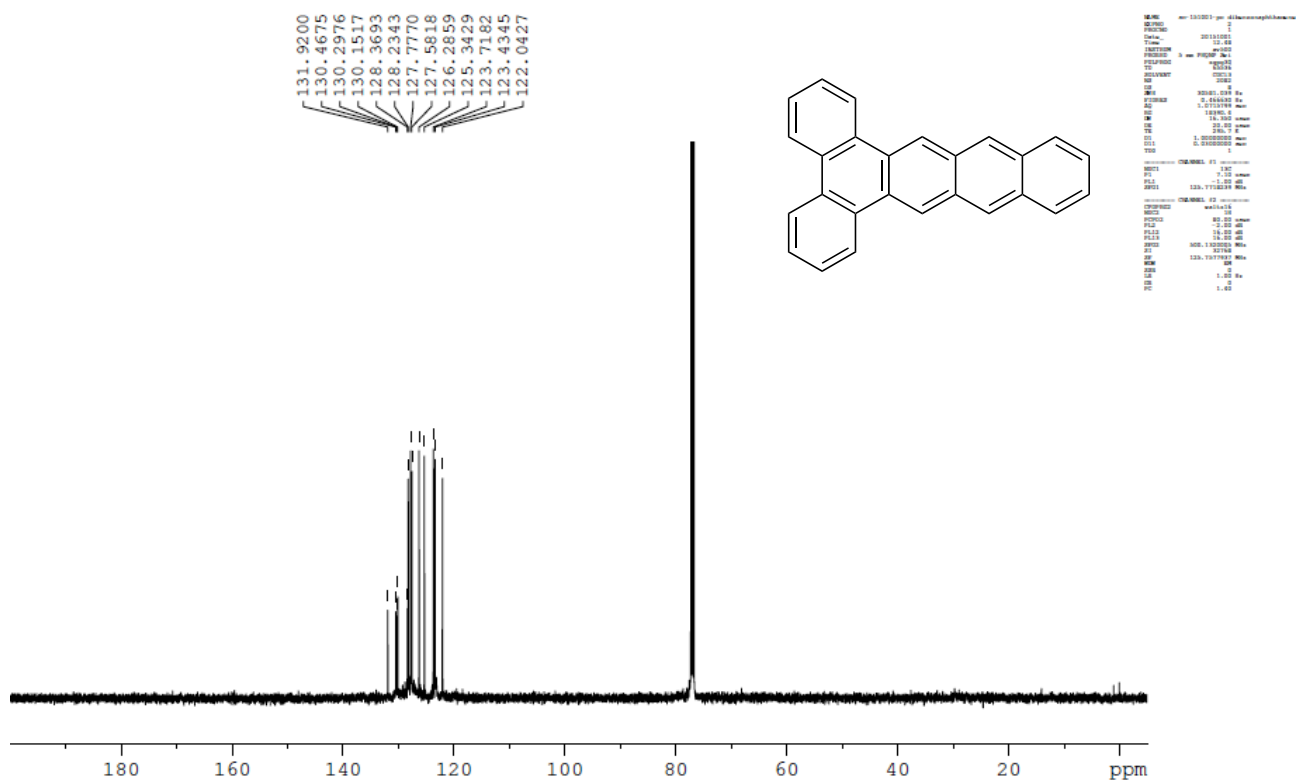

## Benzo[g]chrysene (3a)

<sup>1</sup>H

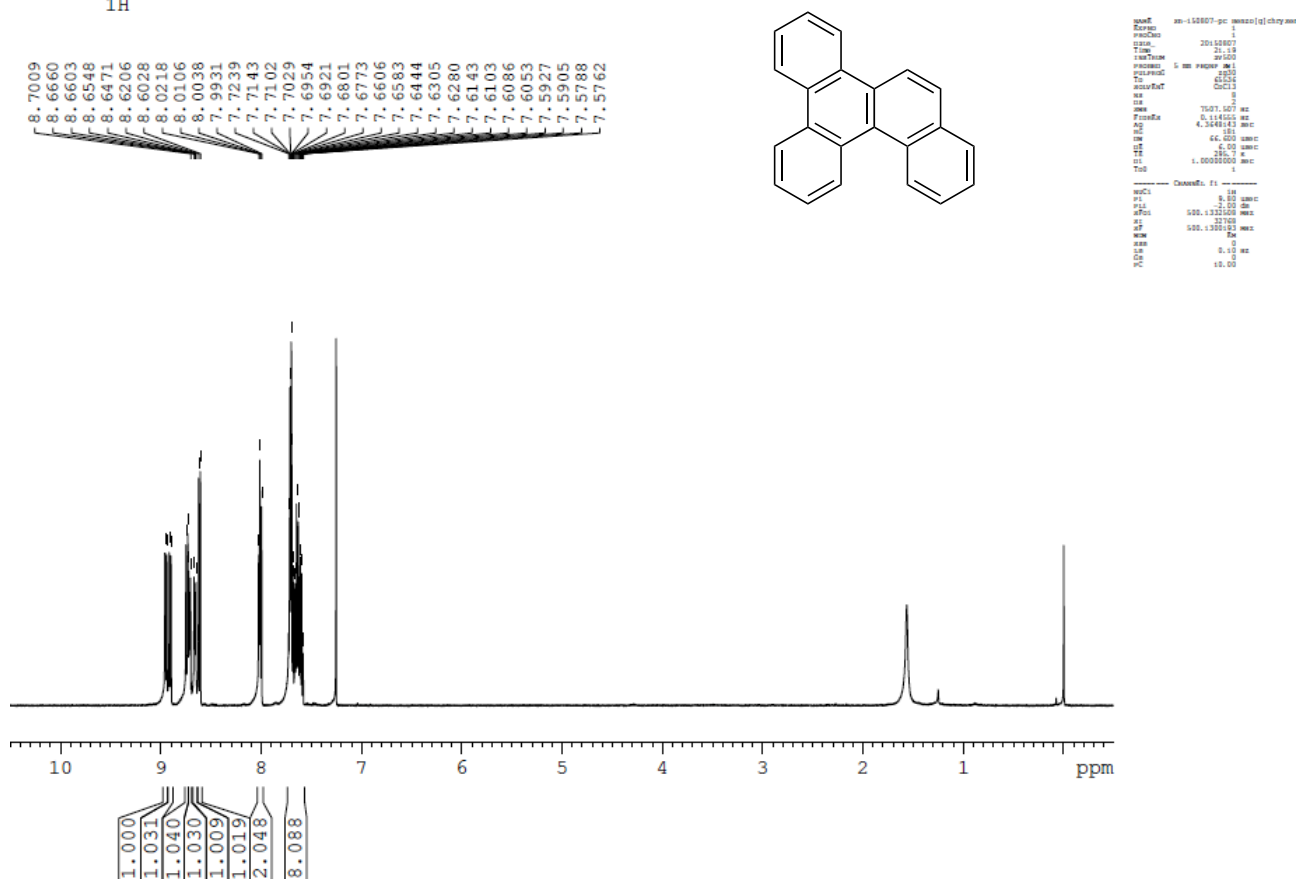

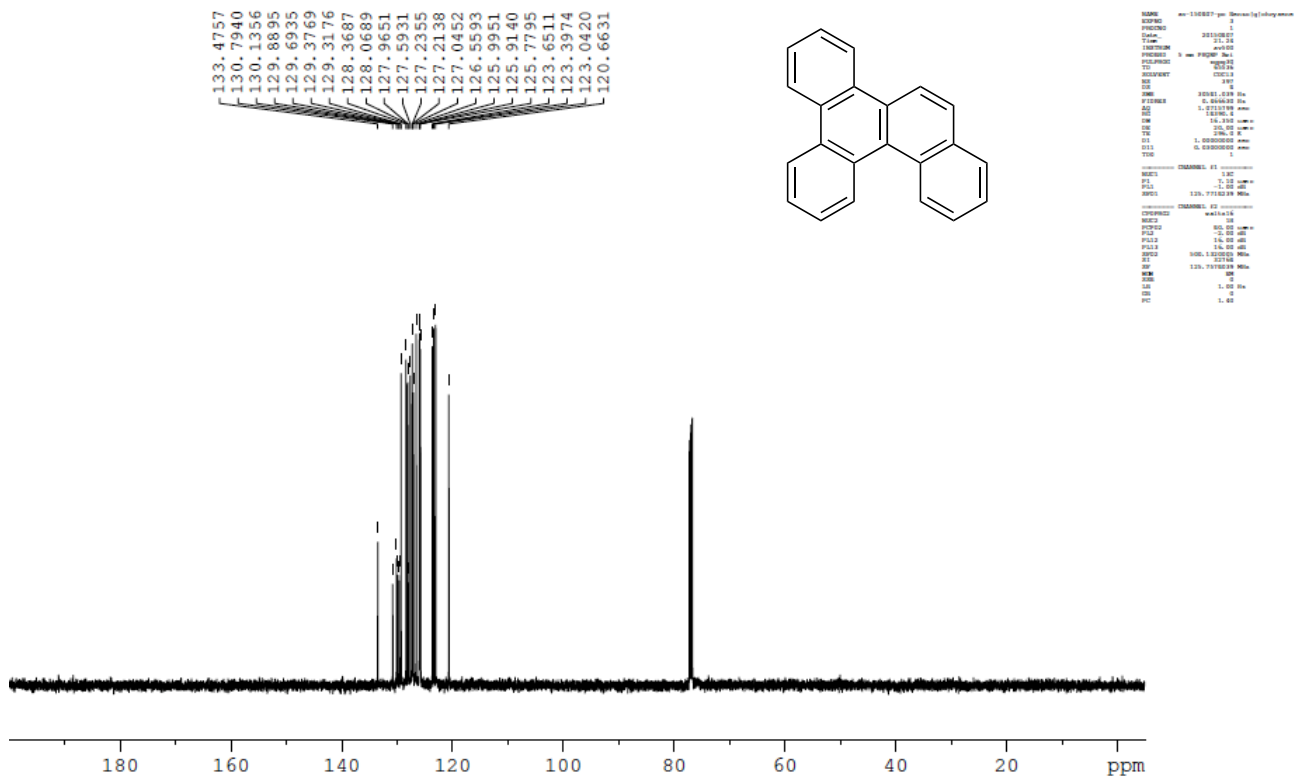

# 12-Methylbenzo[g]chrysene (3b) and 13-Methylbenzo[g]chrysene (3b')

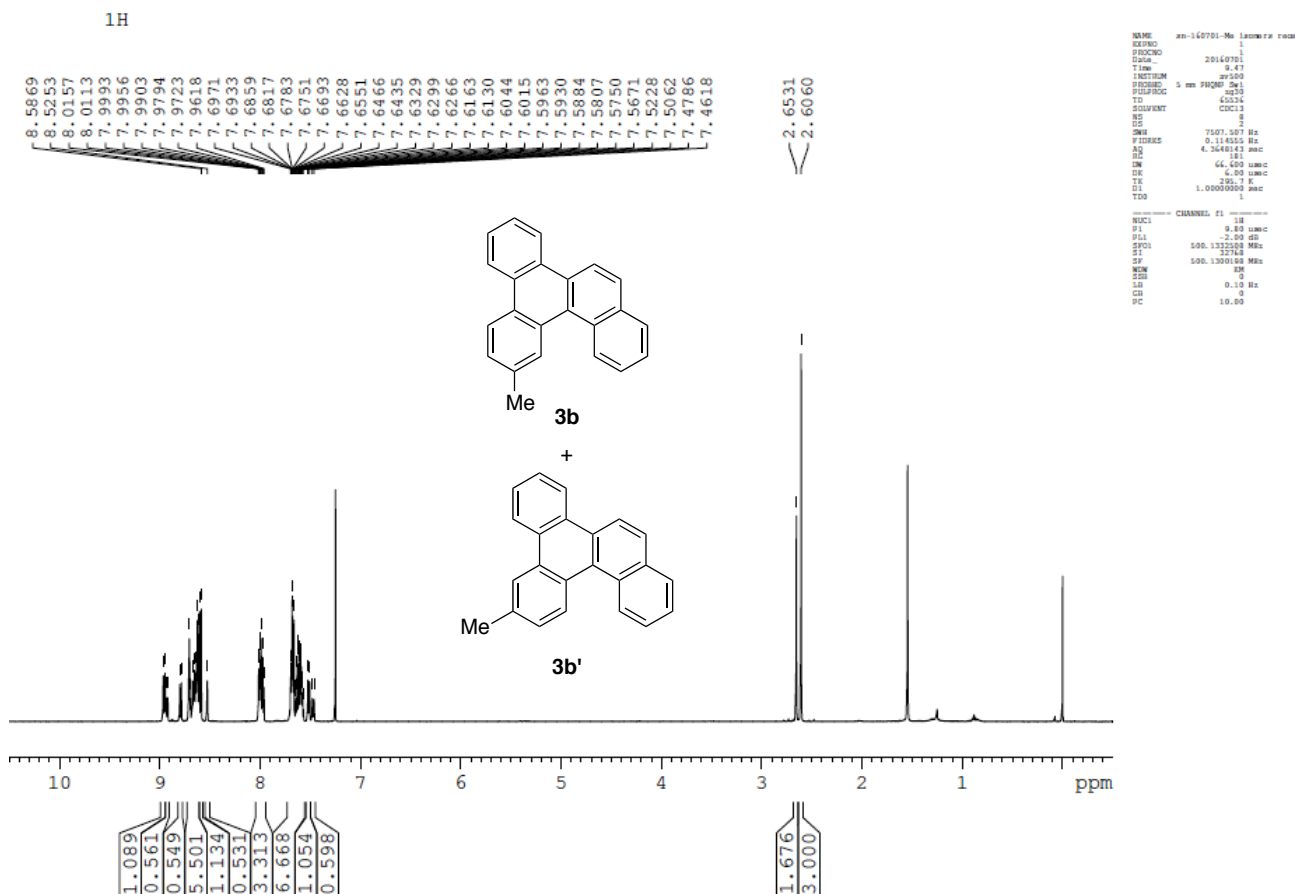

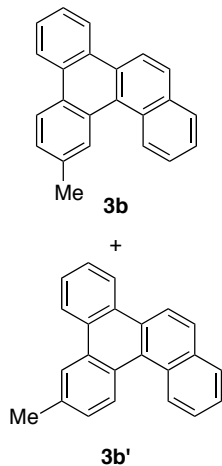

1H

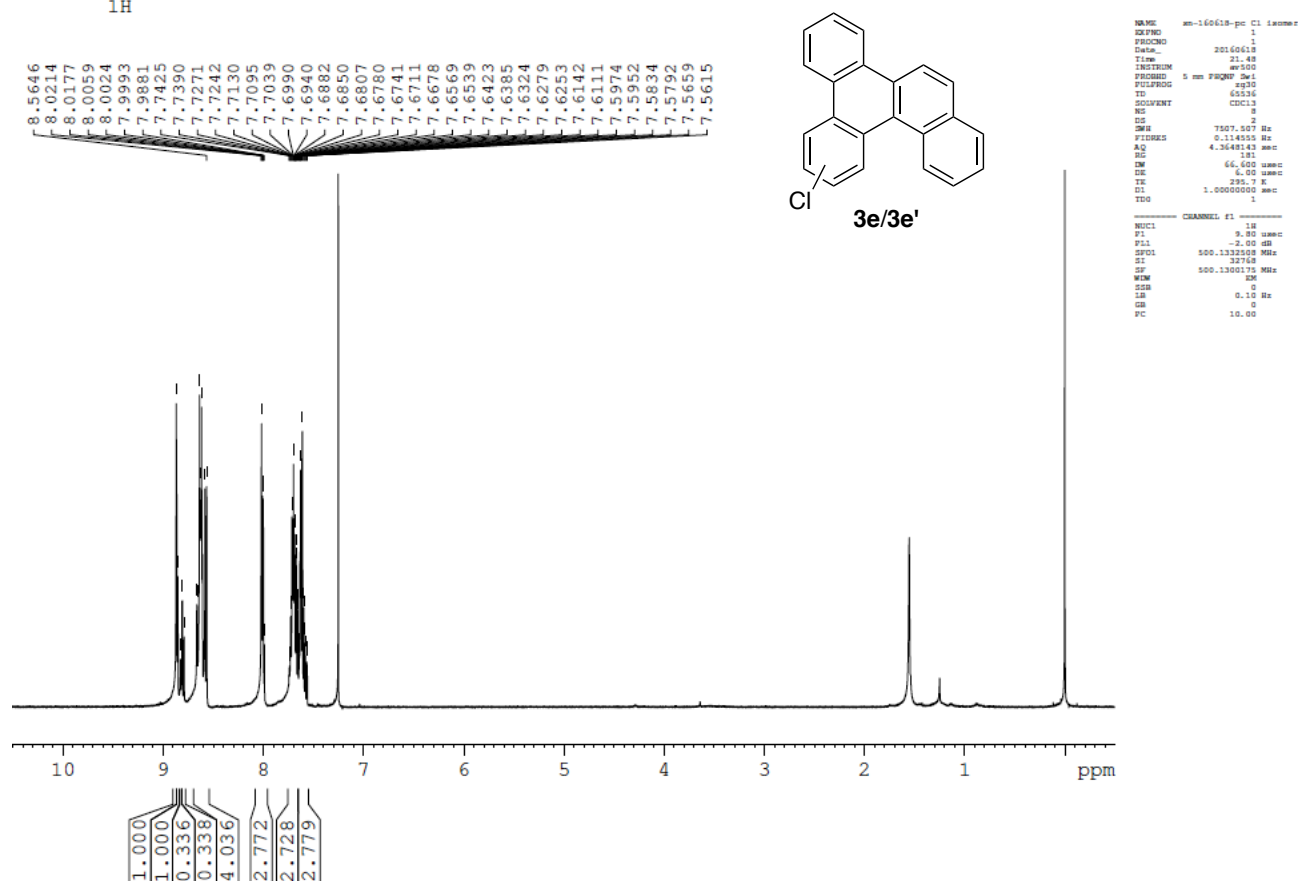

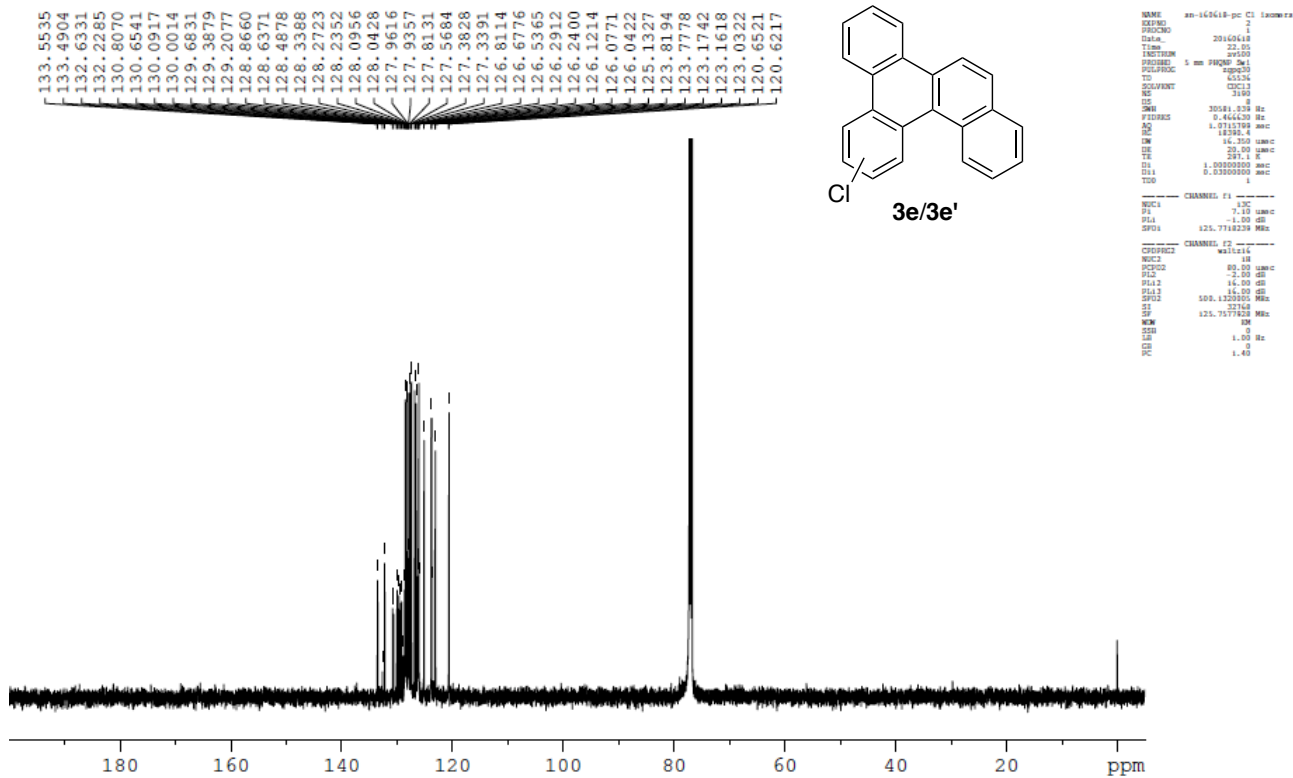

## Dibenzo[*a,c*]tetraphene (3g)

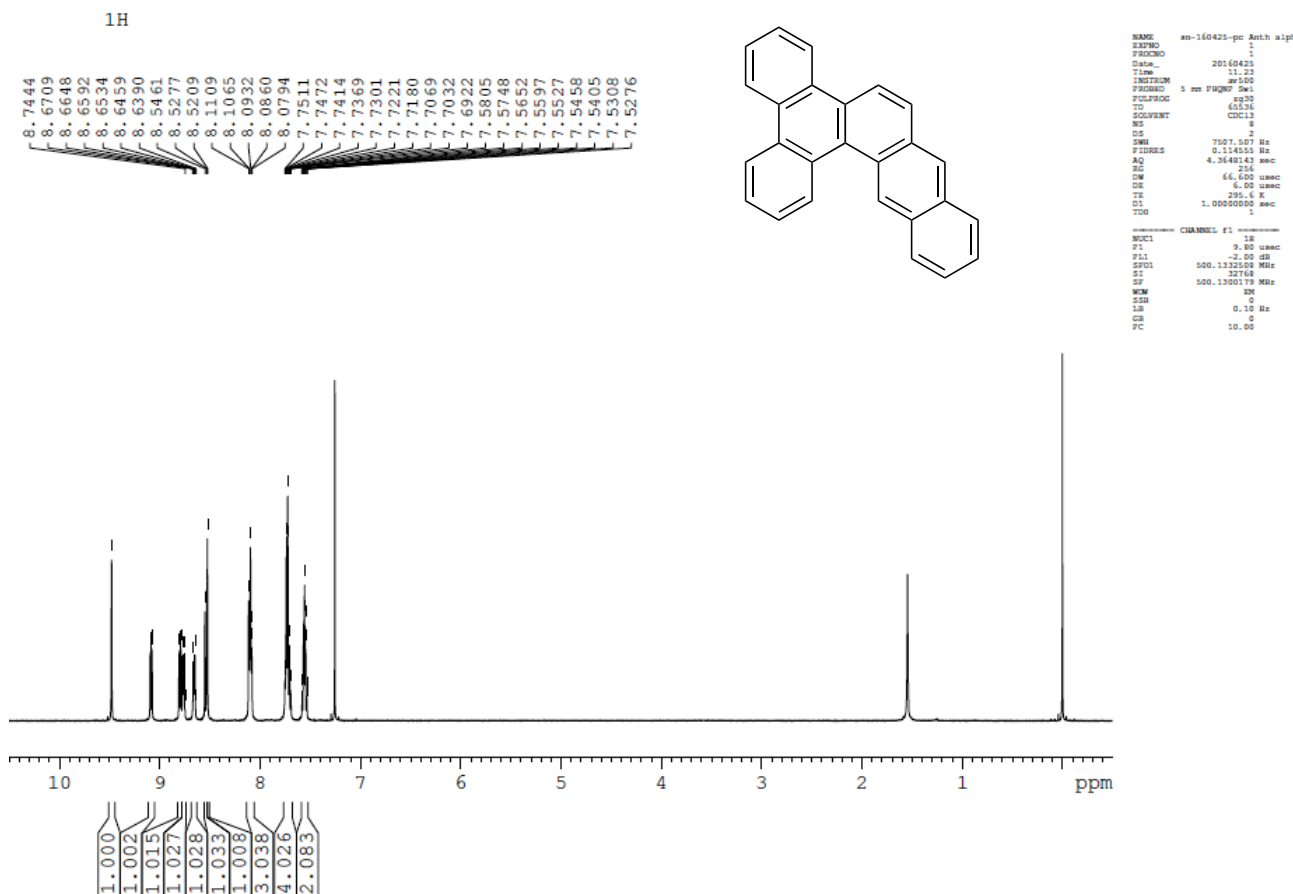

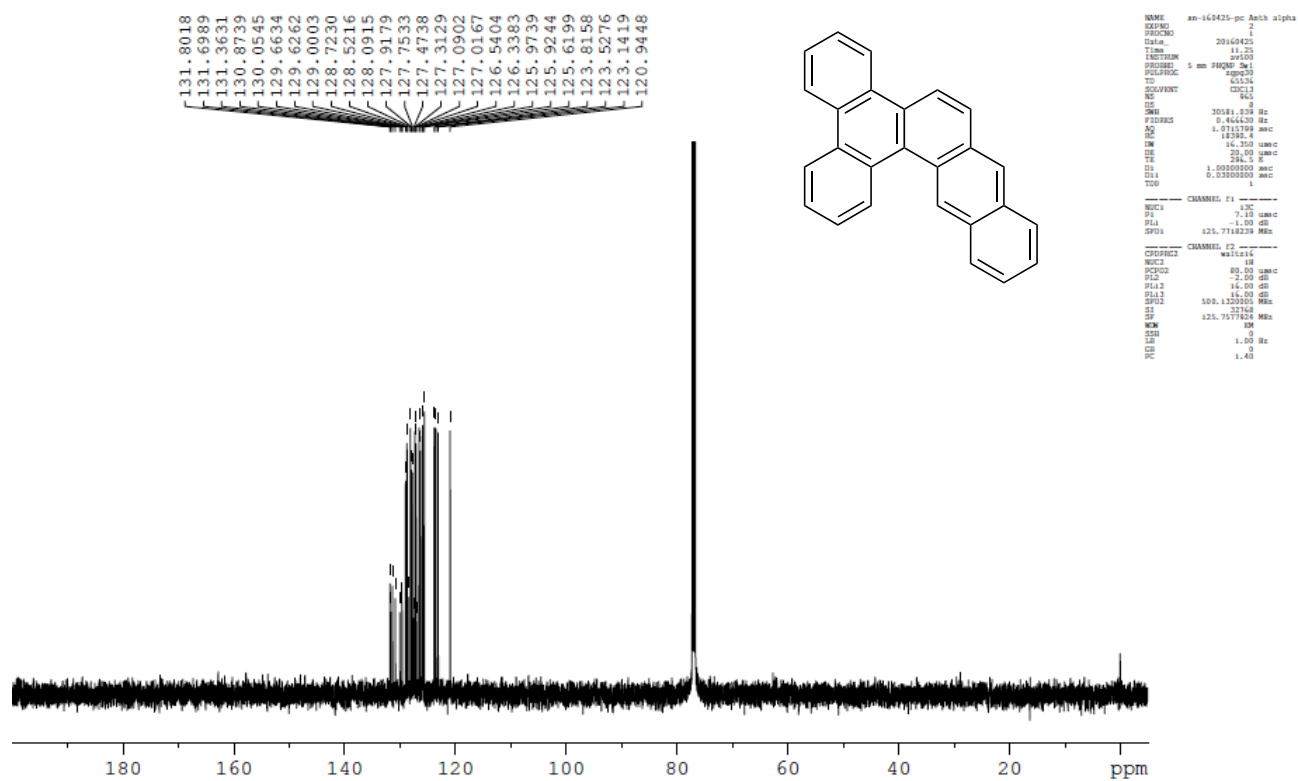

Supplement: c6cc07199f1.pdf [file c6cc07199f1.pdf]
